# Supplementary material
Source: PubMed Central journal article supplement (PMC2688445)

# Supplemental Data File 3:

## Genes Regulated by Caloric Restriction Have Unique Roles within Transcriptional Networks

*William R. Swindell*

*University of Michigan, Departments of Pathology and Geriatrics*

-----

This file displays dendrograms based on each CR-regulated gene and its nearest-neighbors in the genome-wide transcriptional network. For each gene, the 25 most similar genes throughout the genome were identified based upon expression patterns from four independent datasets (Tissue, Developmental, Treatment and Mutation Series). Similarity between genes was determined by averaging absolute correlation coefficients across the four datasets. Each CR-regulated gene was then clustered along with its neighbors to obtain the dendrograms shown in this file. In each image, the CR-regulated gene upon which the dendrogram is based is shown in the upper-left corner. Throughout all images, CR-upregulated genes have red labels, while CR-downregulated genes have green labels.

-----

Contact: William R. Swindell, [wswindel@umich.edu](mailto:wswindel@umich.edu)

# Col3a1

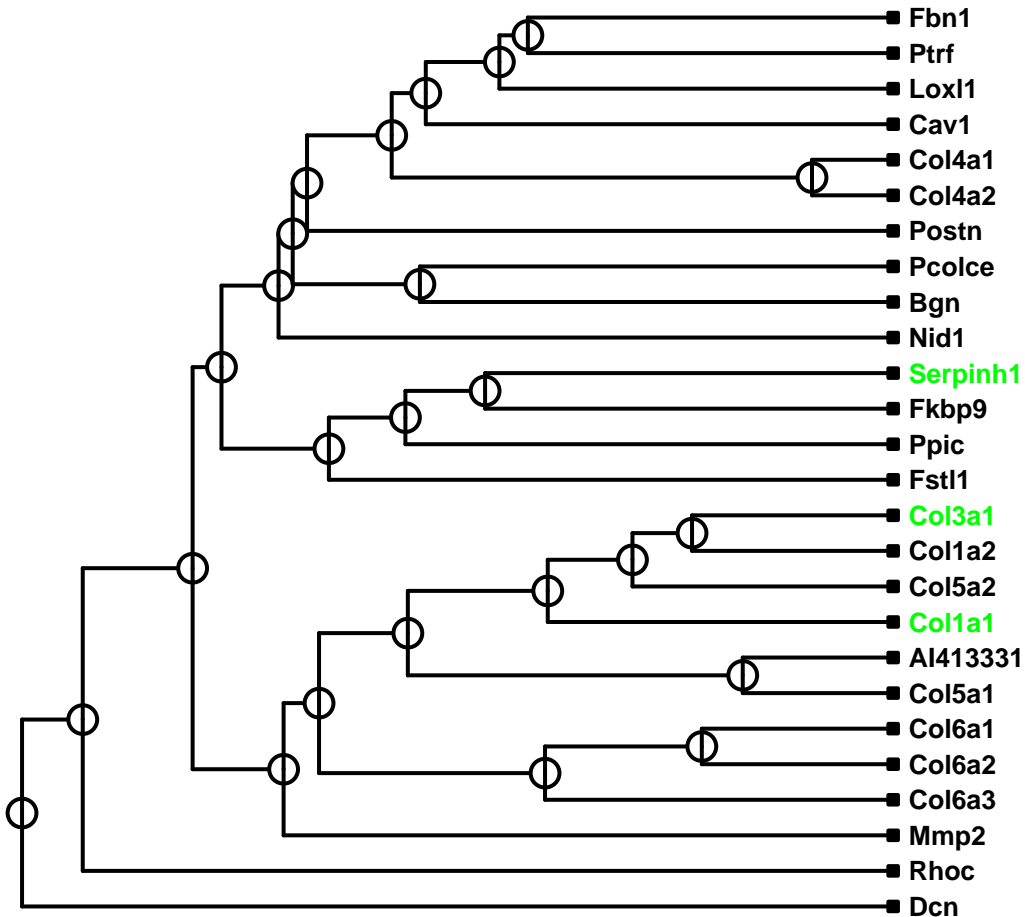

# Cd74

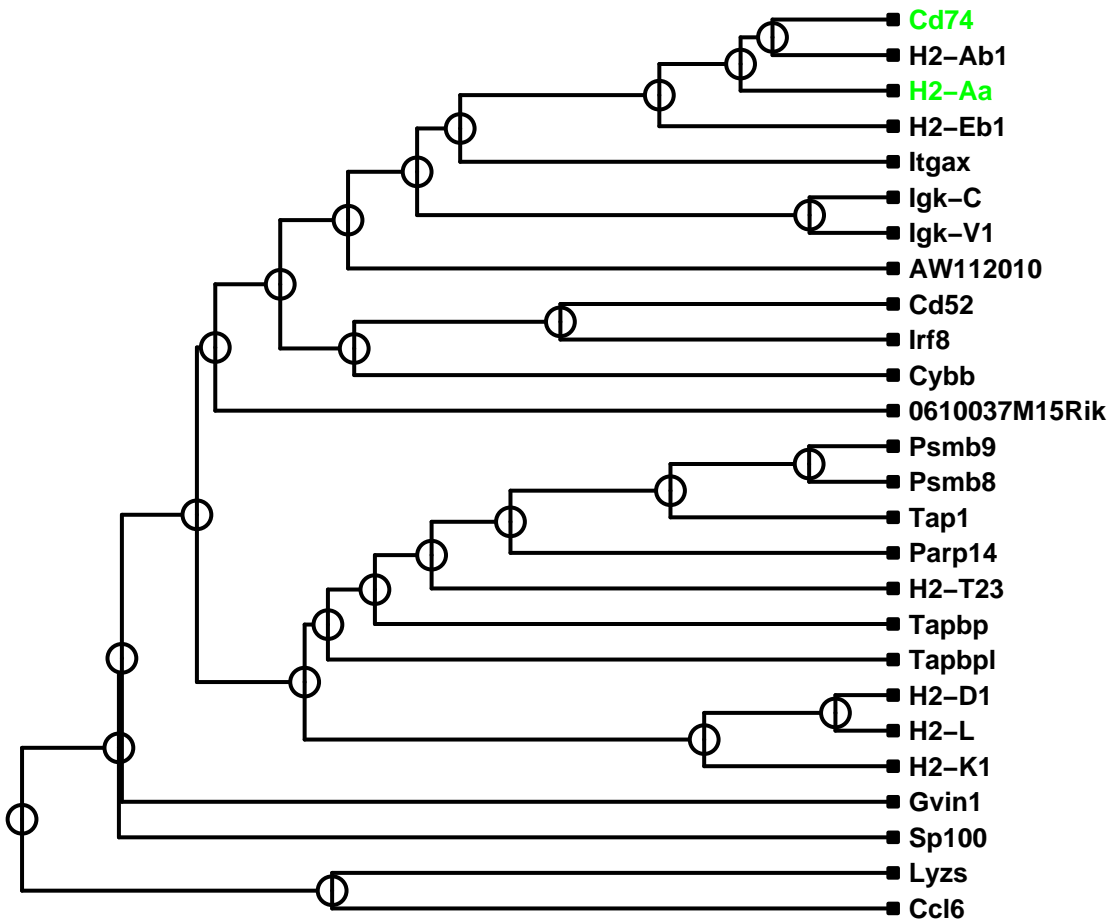

0.30 0.25 0.20 0.15 0.10 0.05 0.00

**Tgtp**

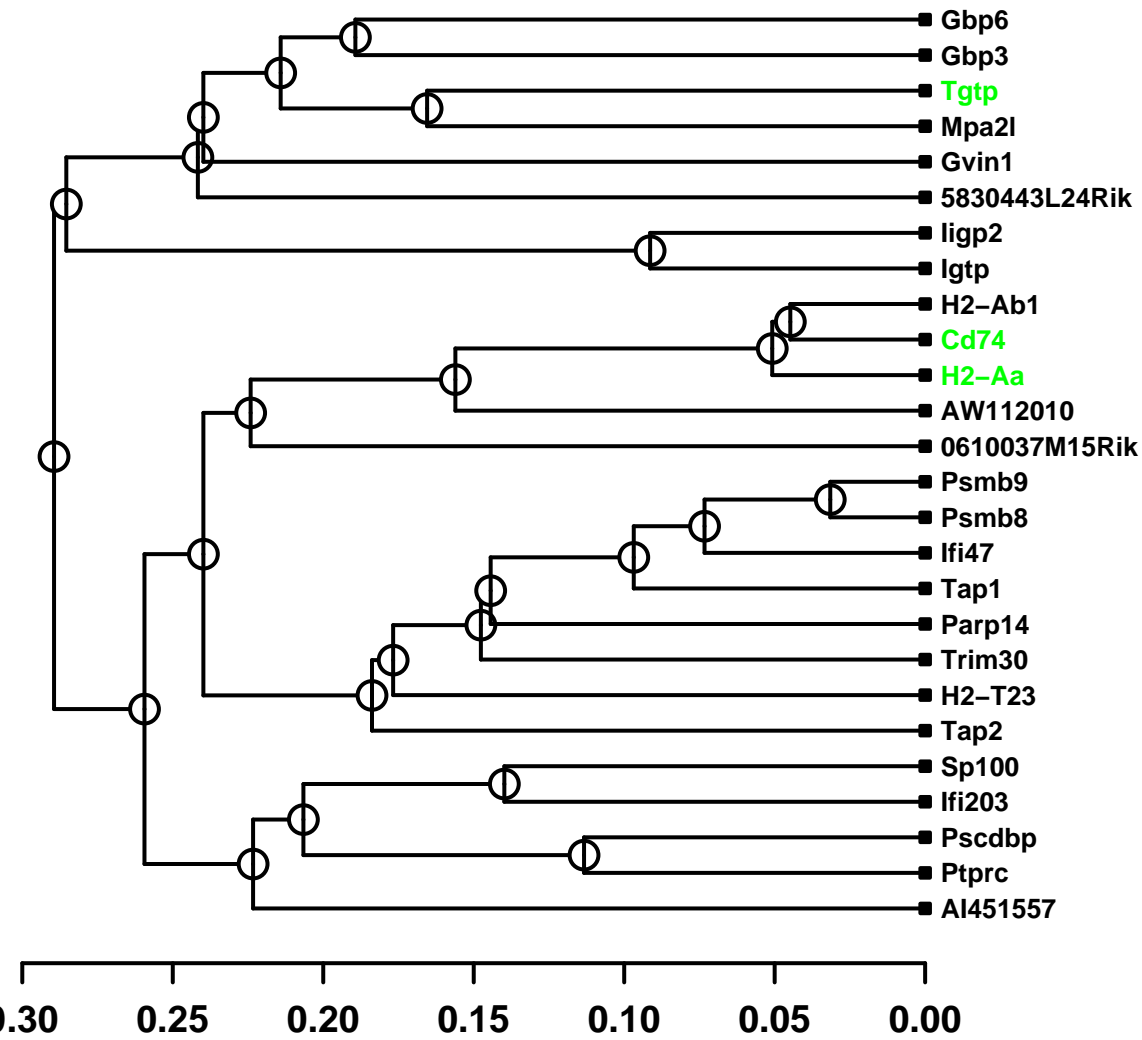

# Ccl9

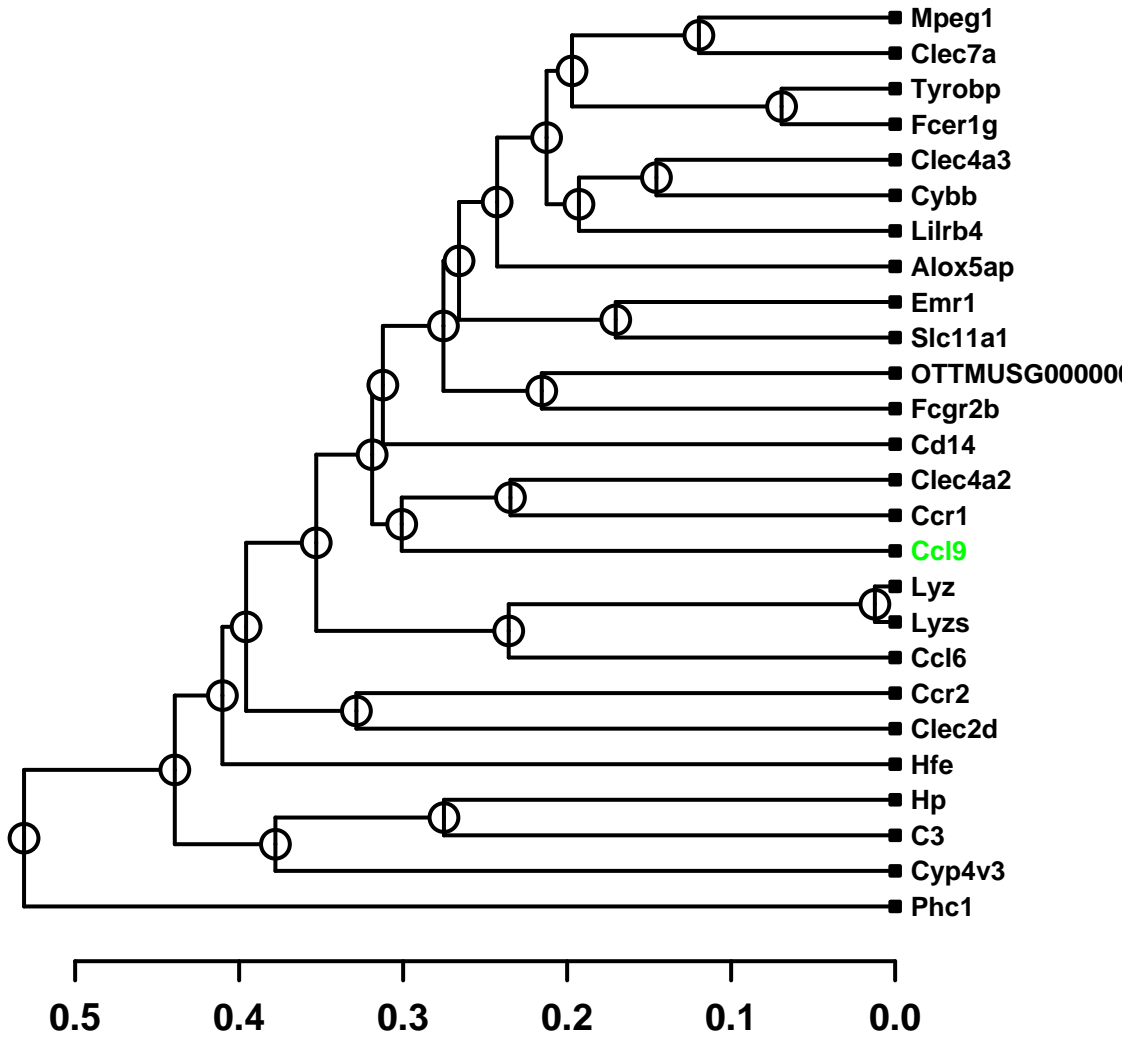

# lfitm3

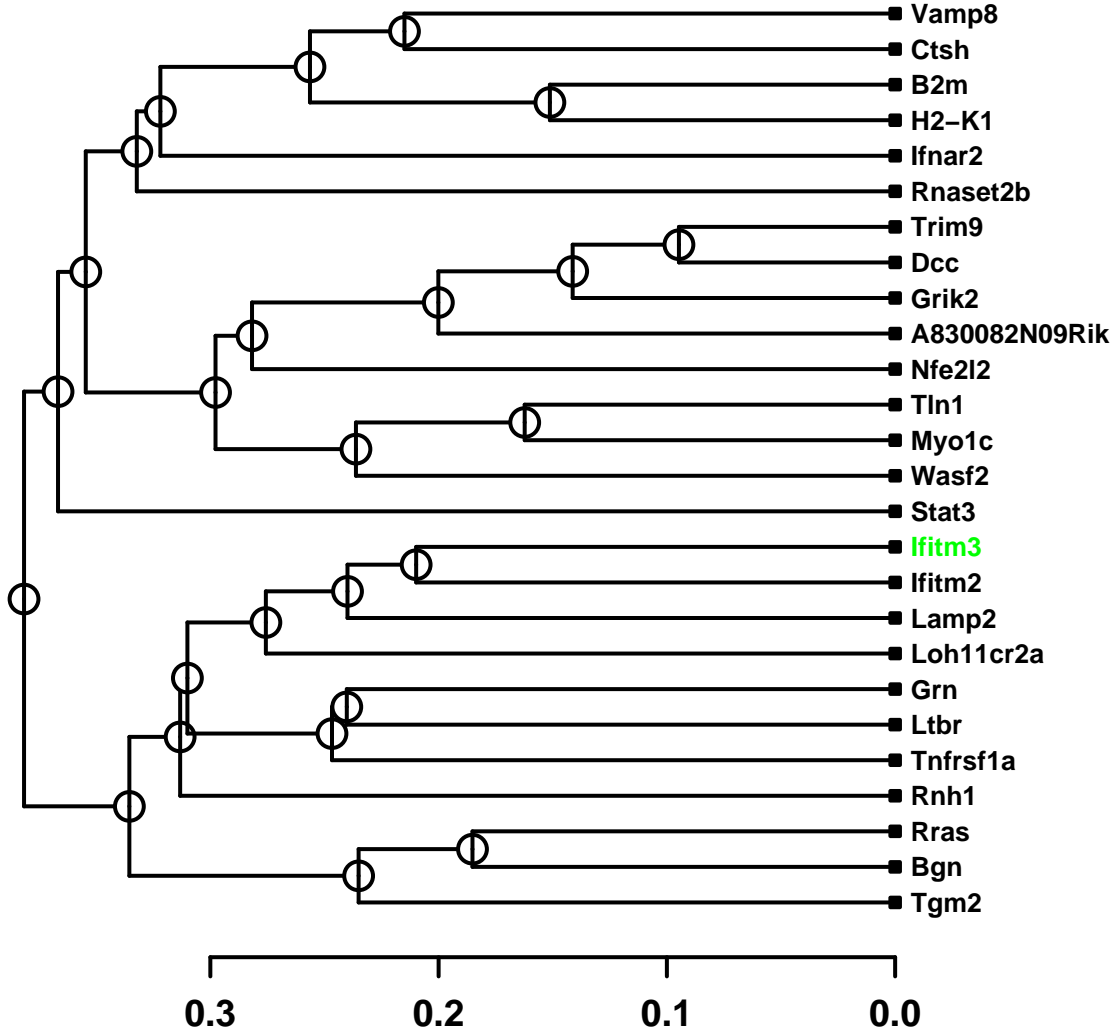

# H2-Aa

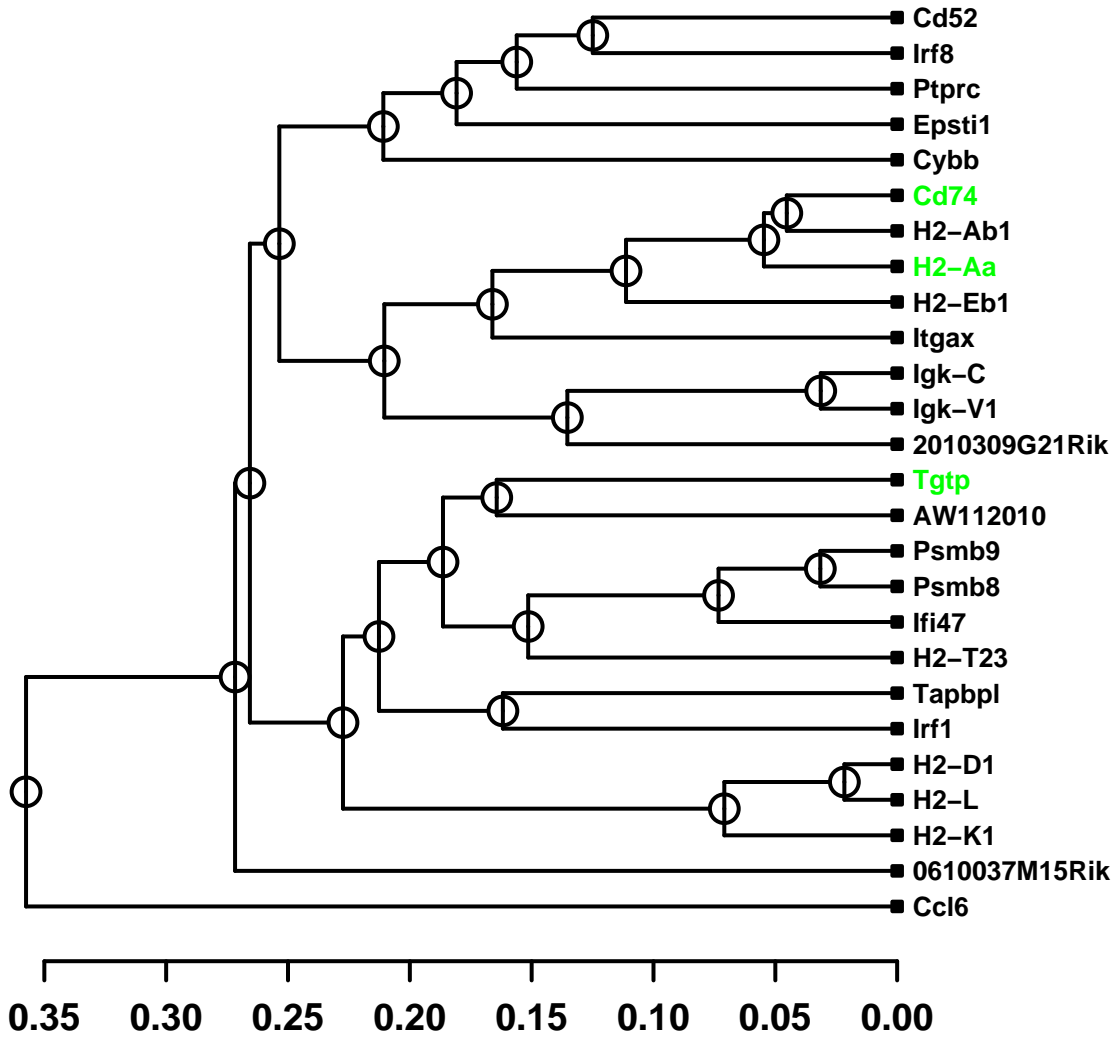

# Col1a1

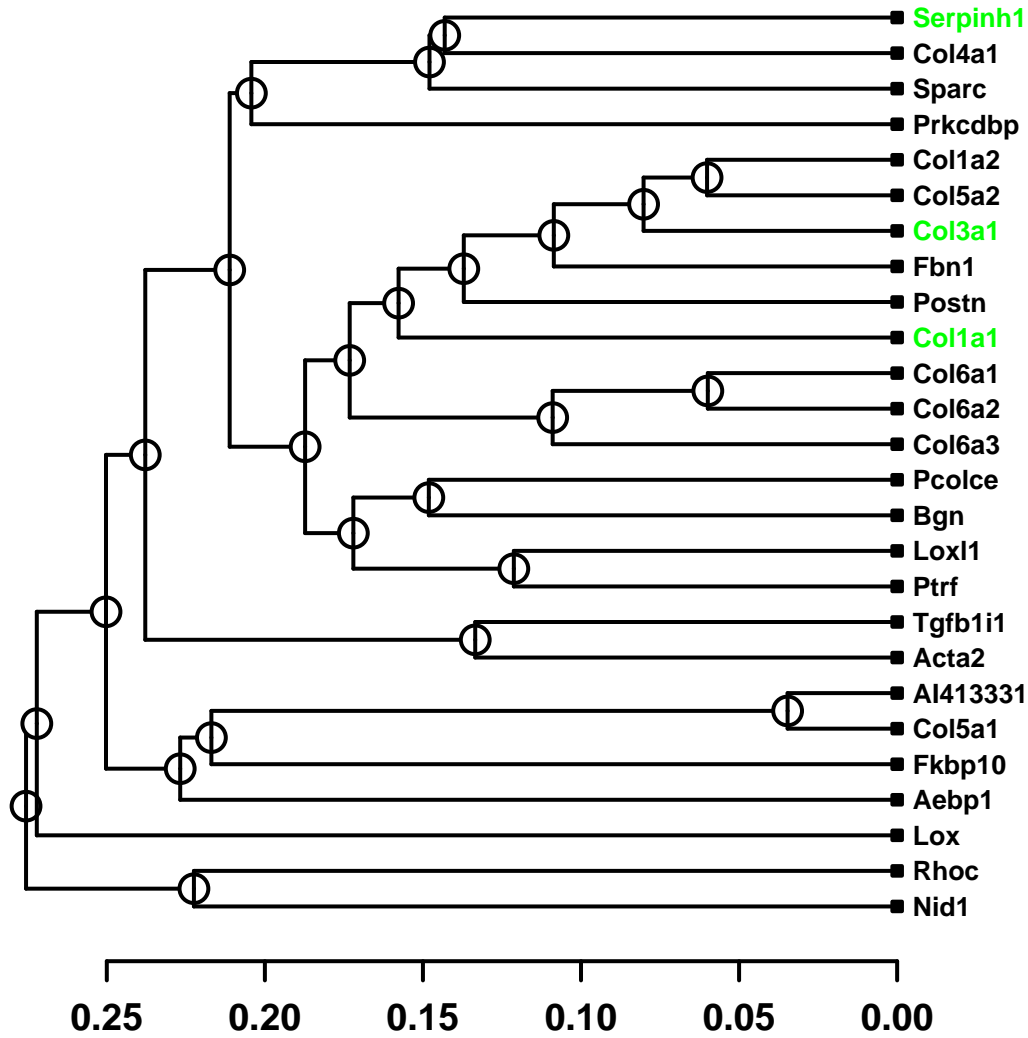



# Gng11

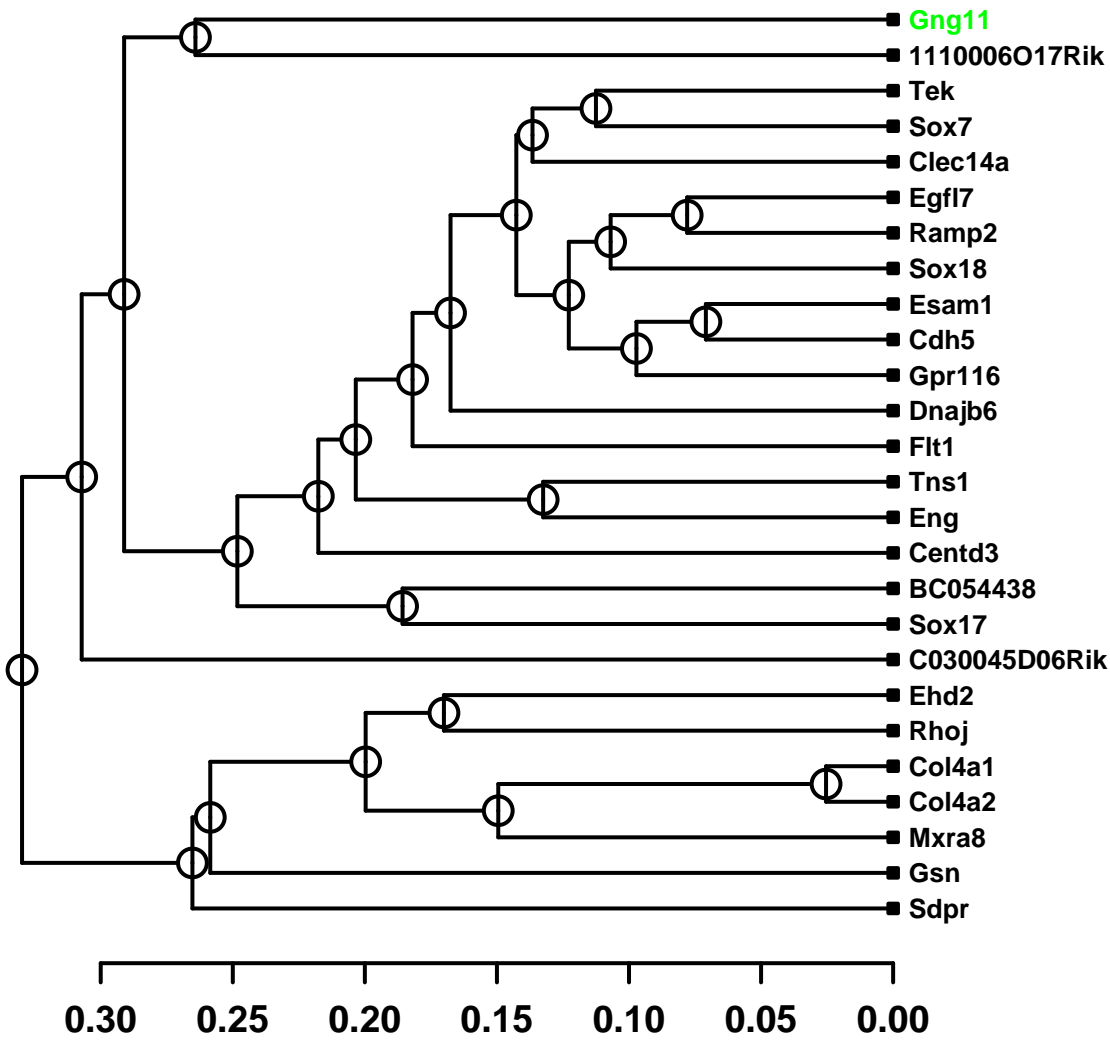

# C1qb

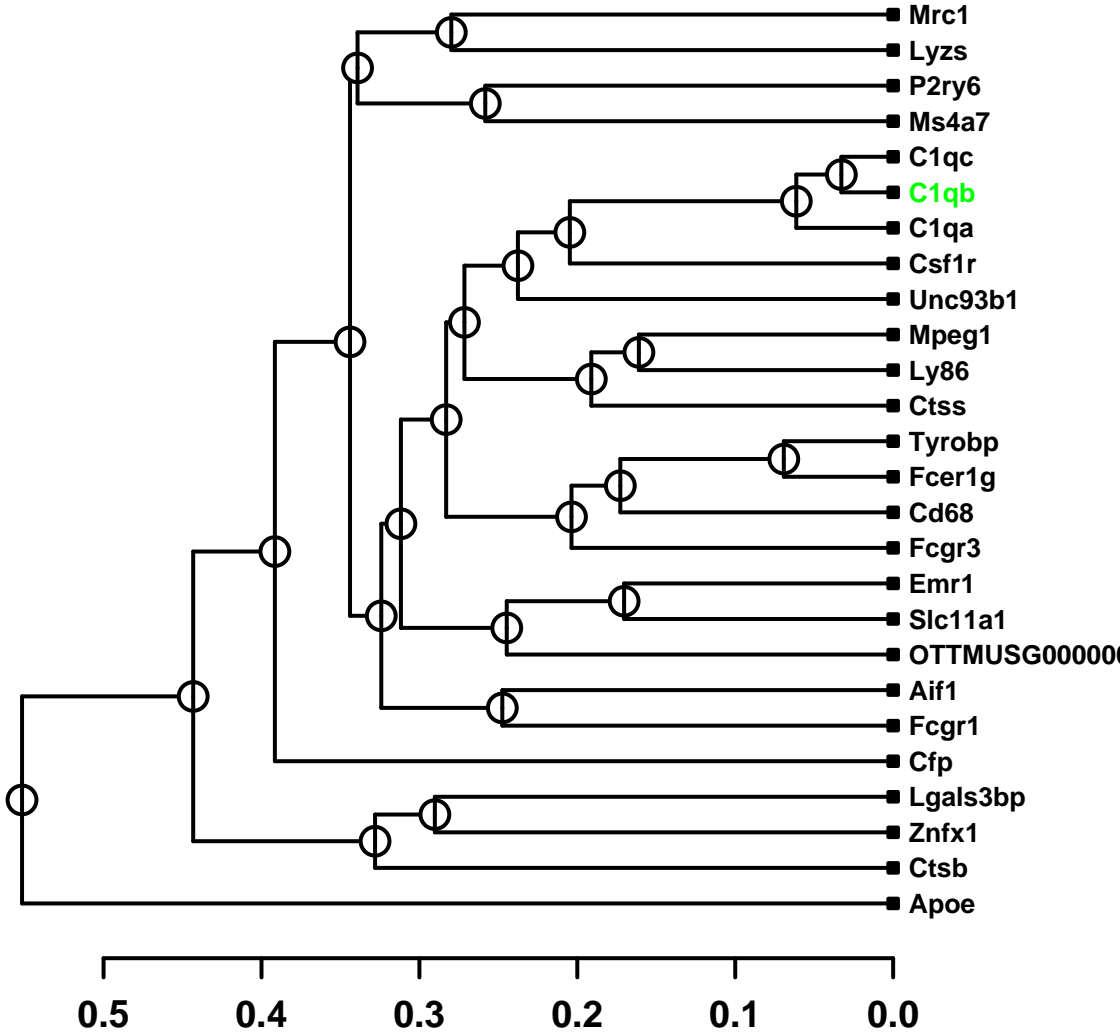

# Hsp110

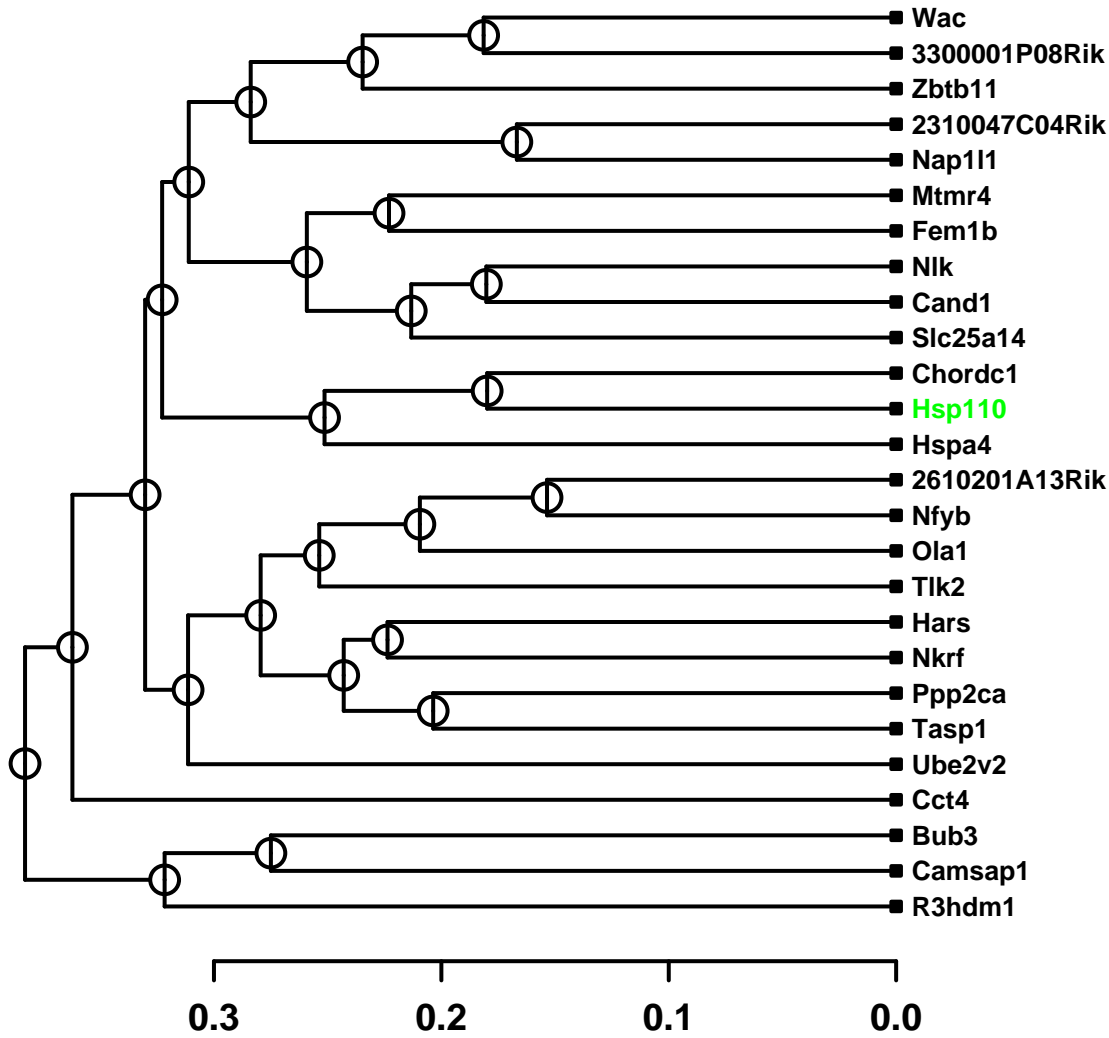

# lfi27

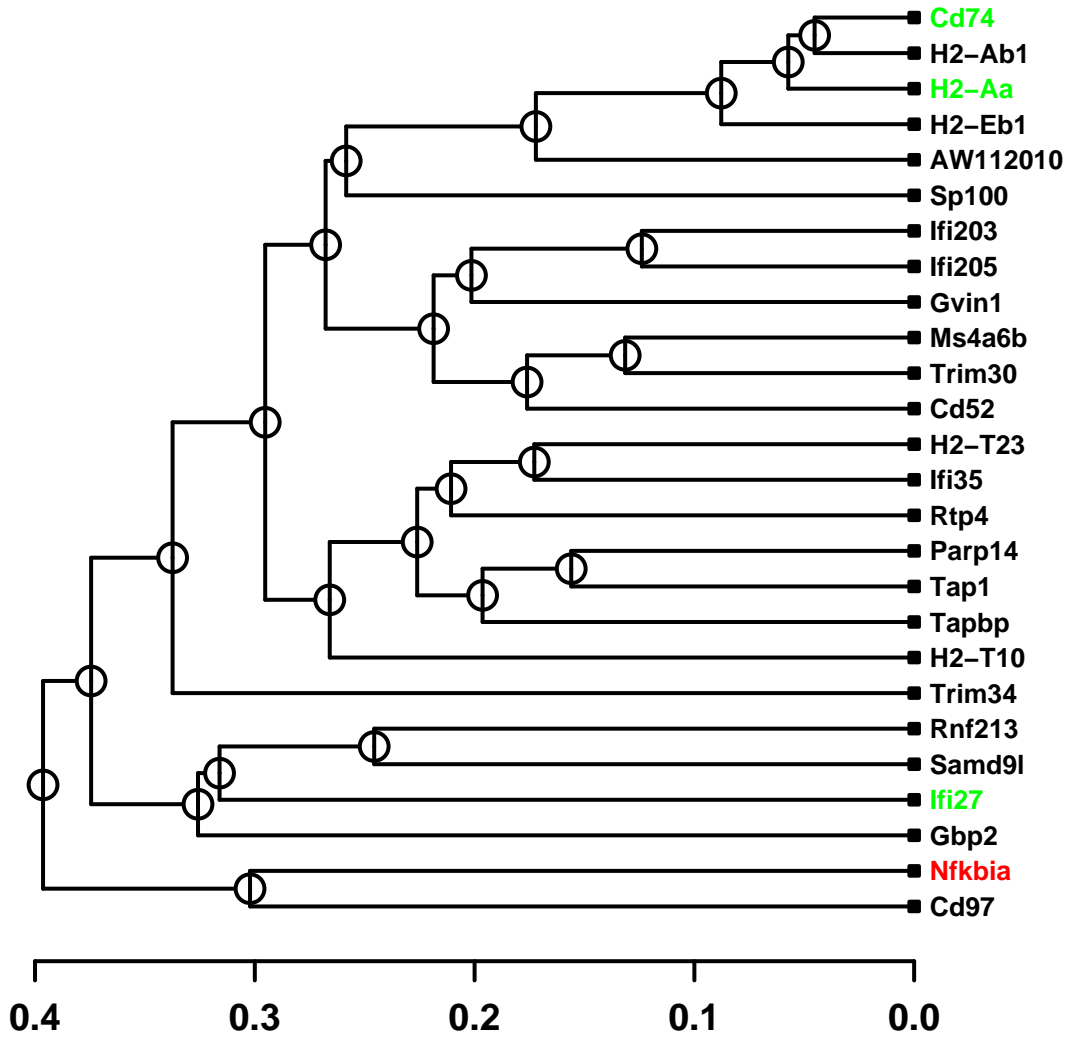

# Serpinh1

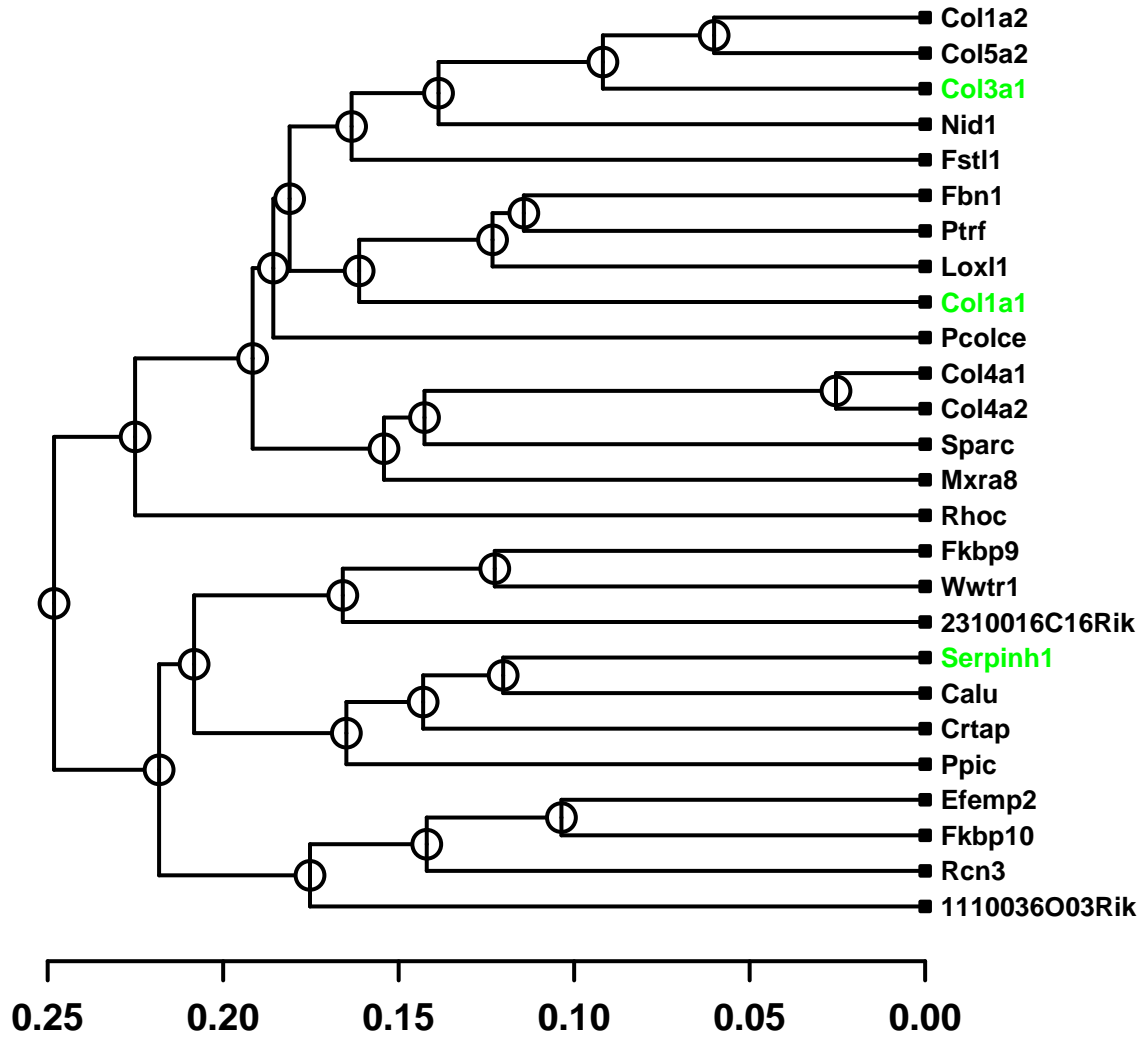

**Mt1**

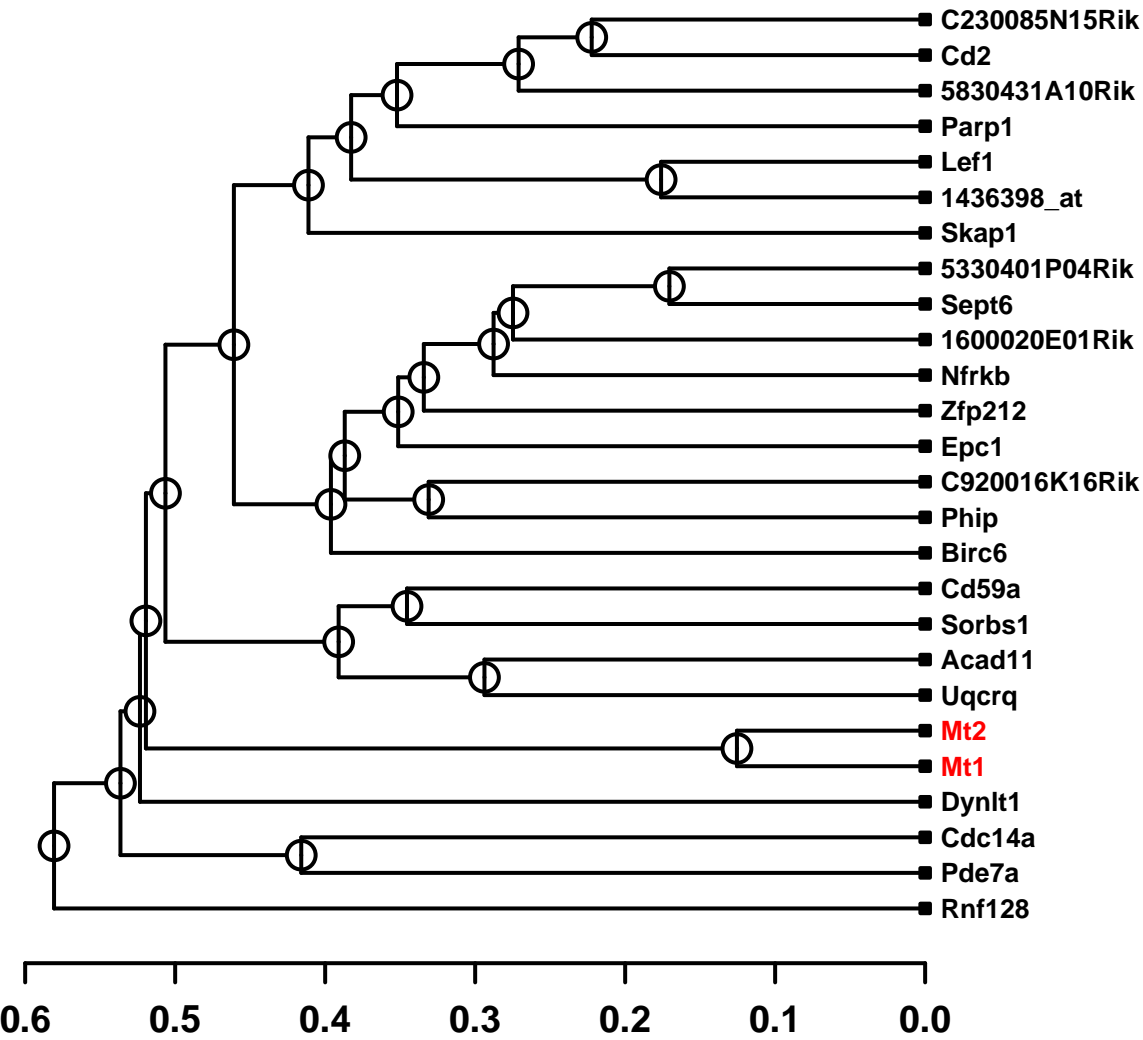

# Mt2

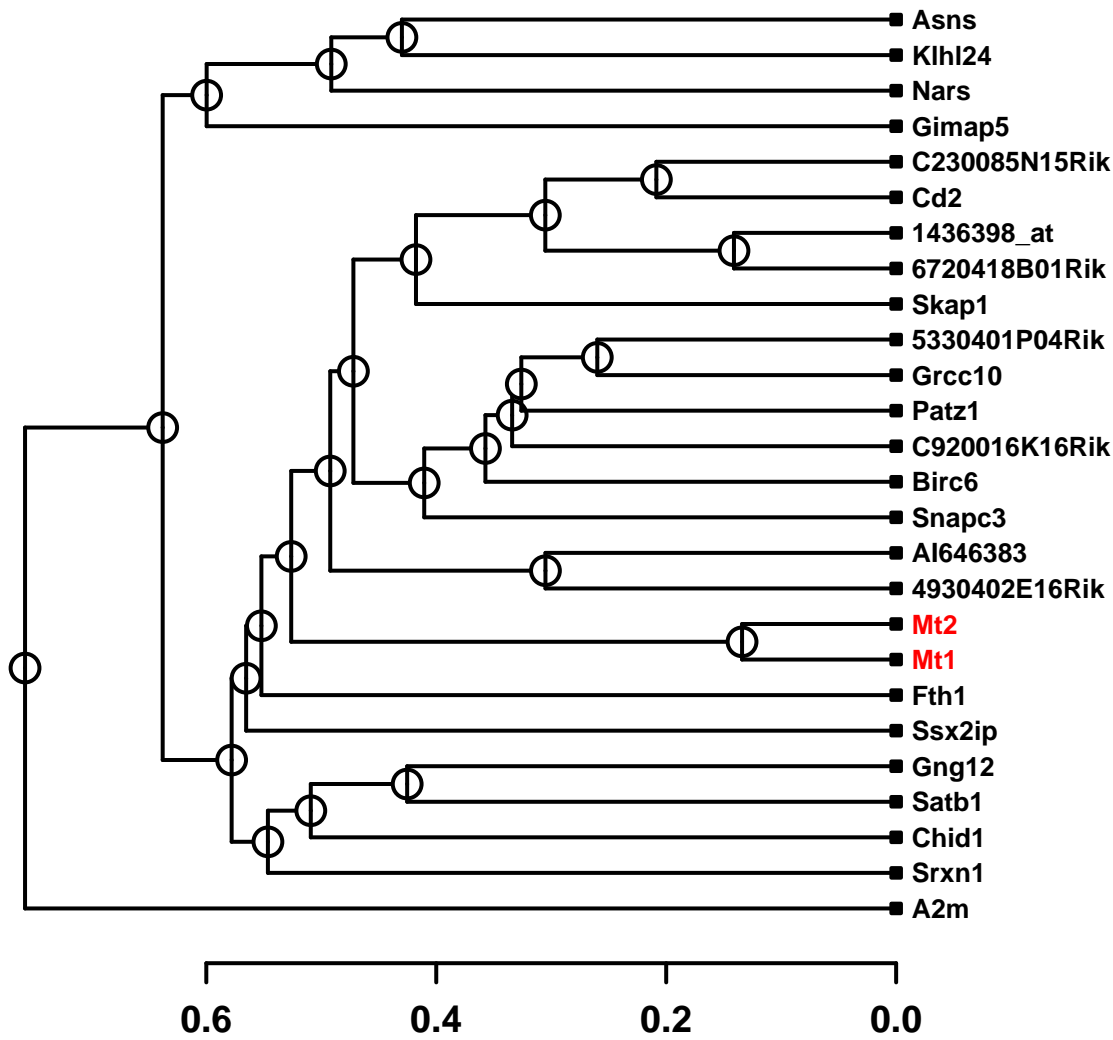

# Per1

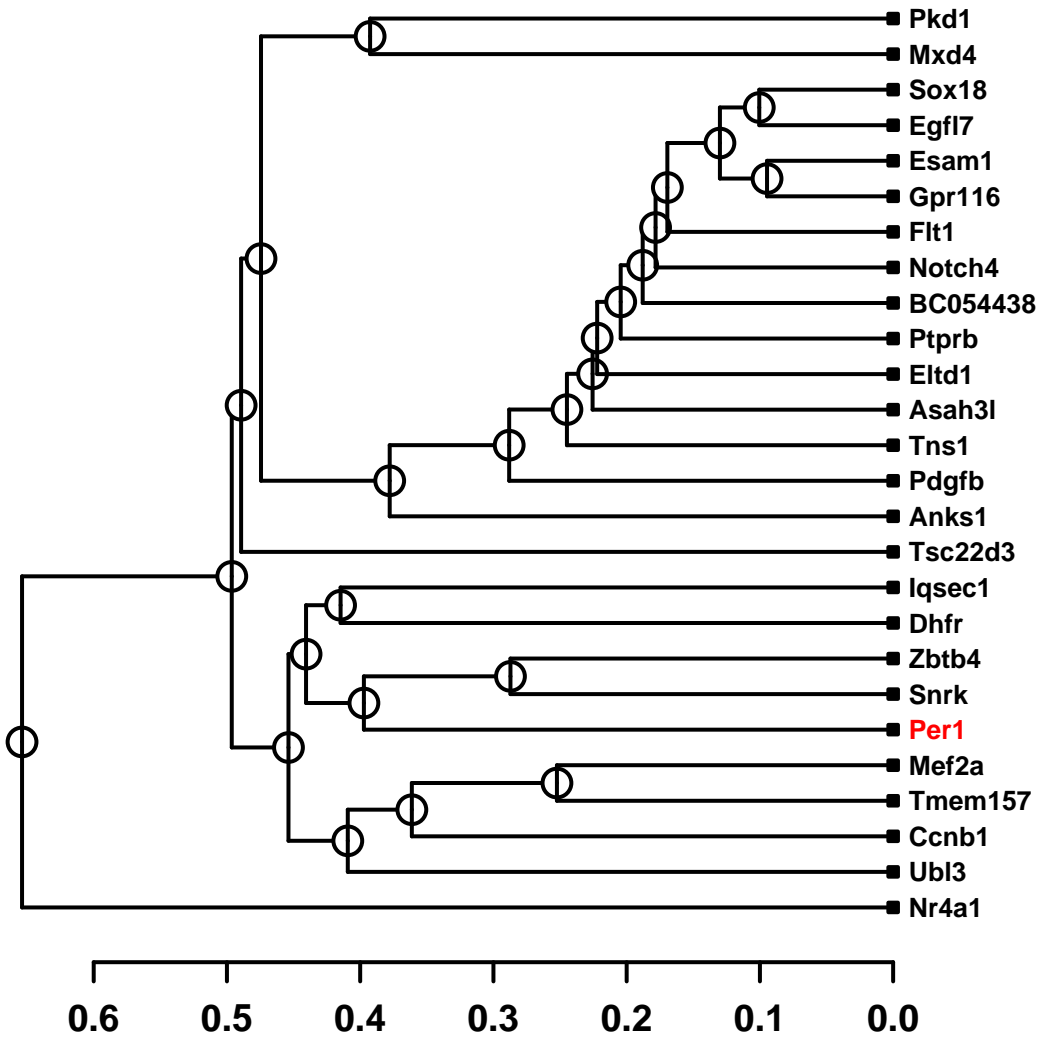



# Per2

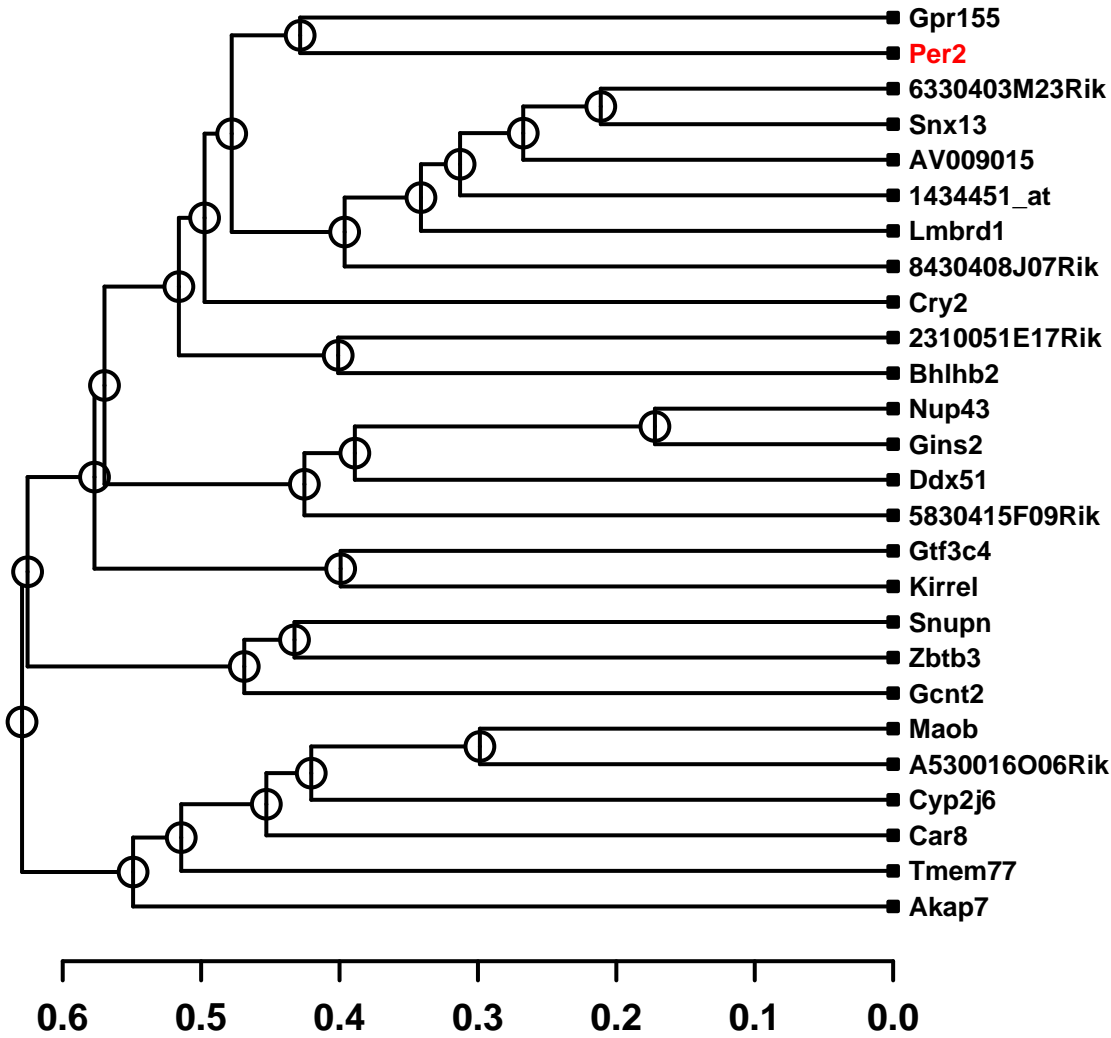

# Ppara

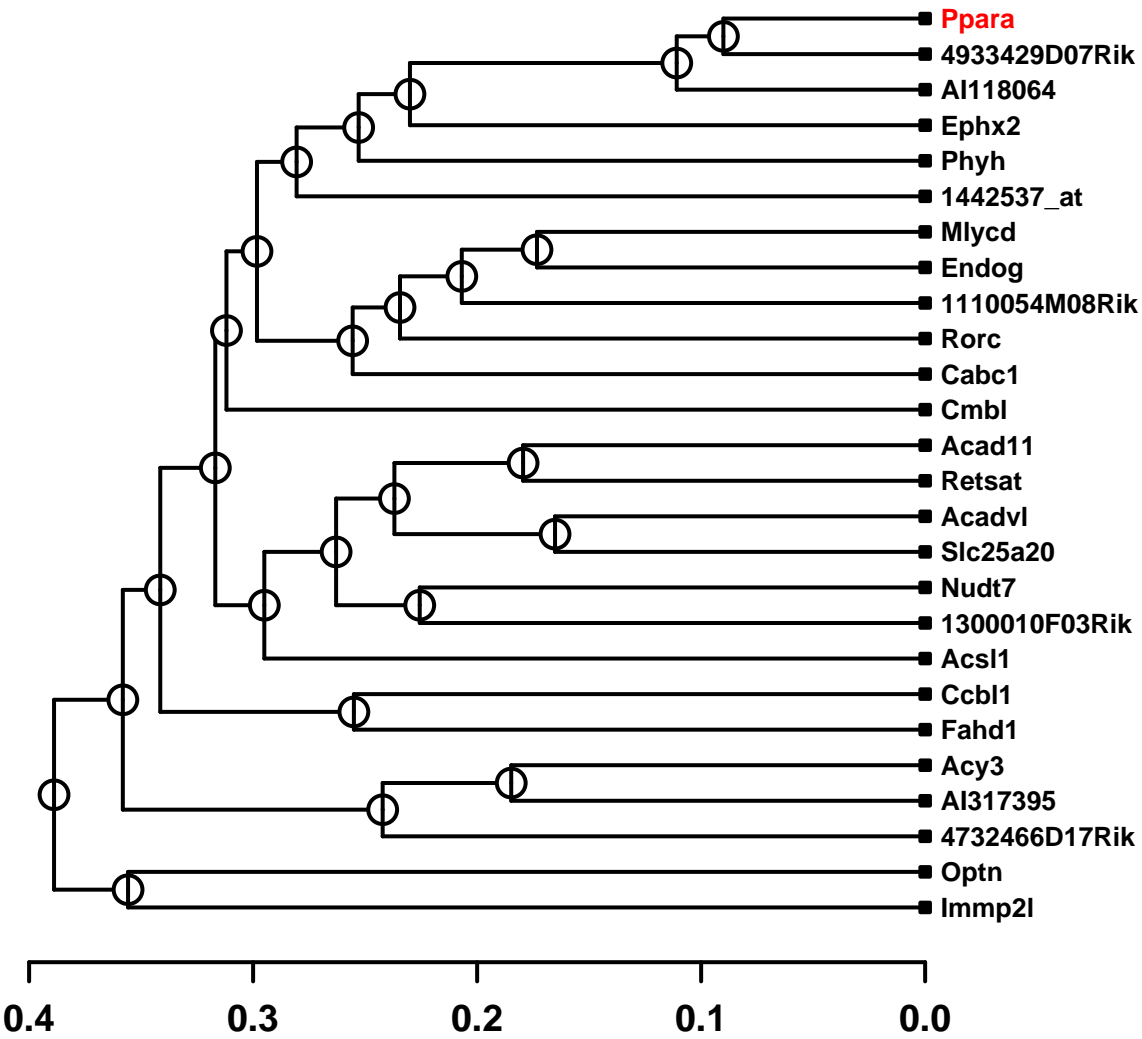

# Sult1a1

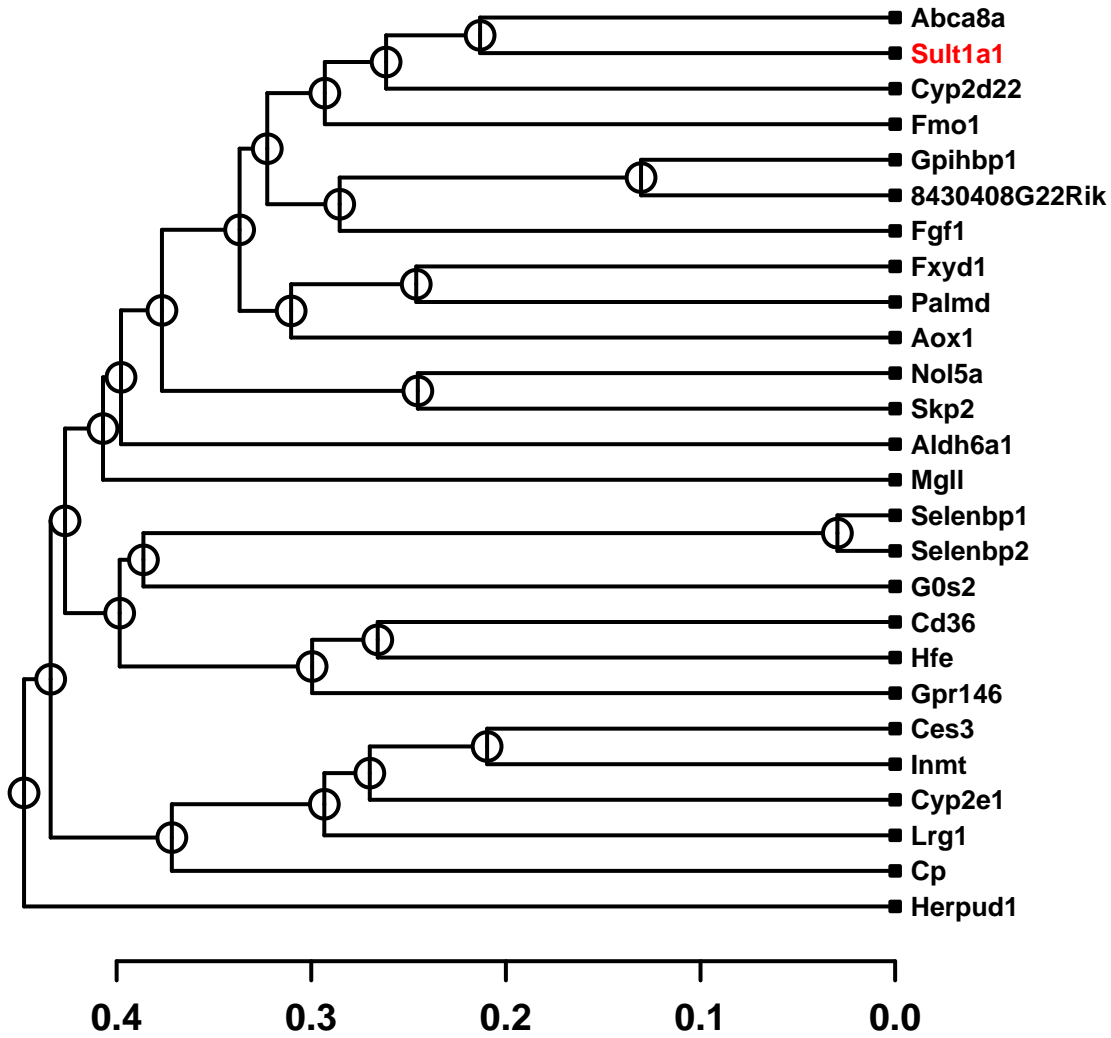

# MGI:1924575

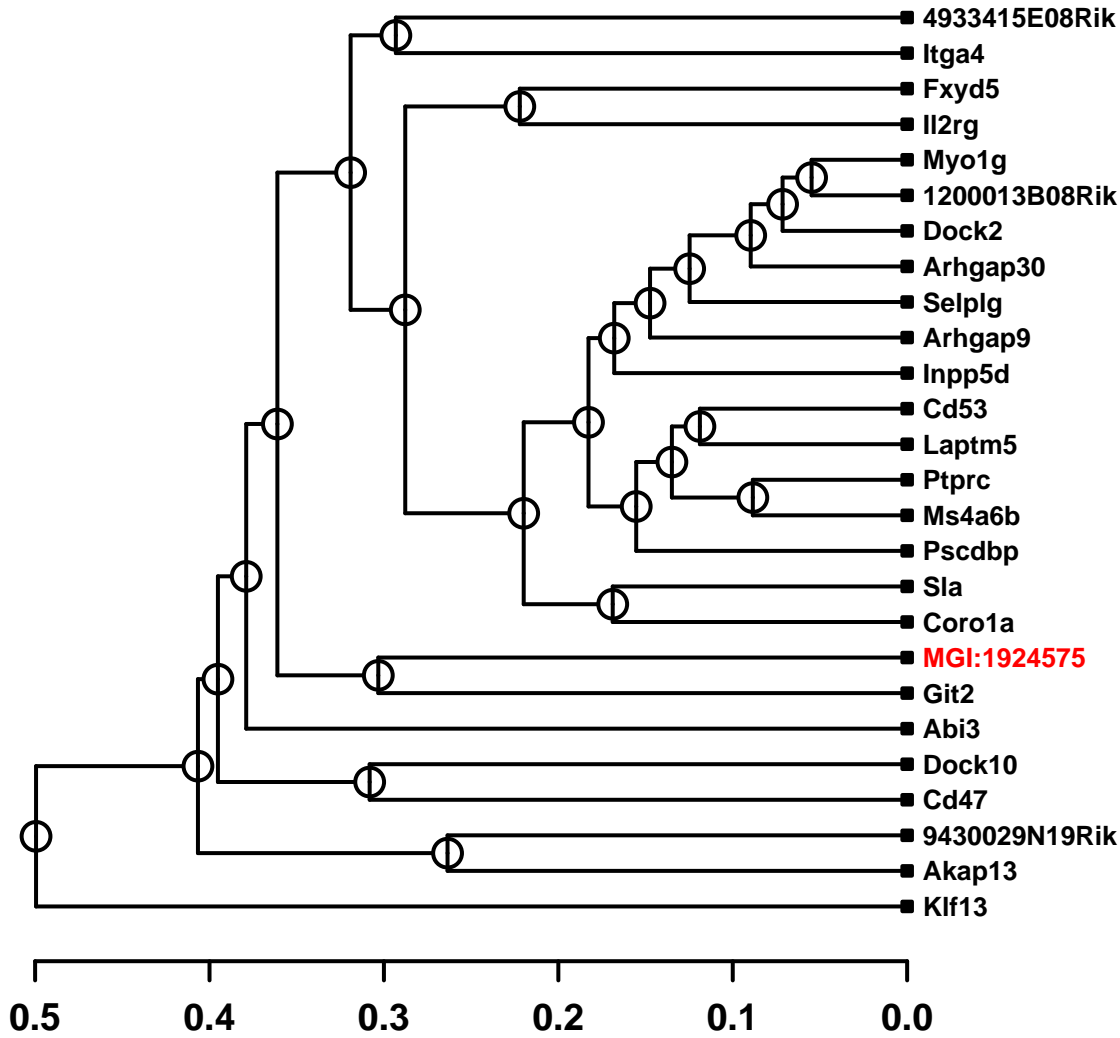

# Ddit4

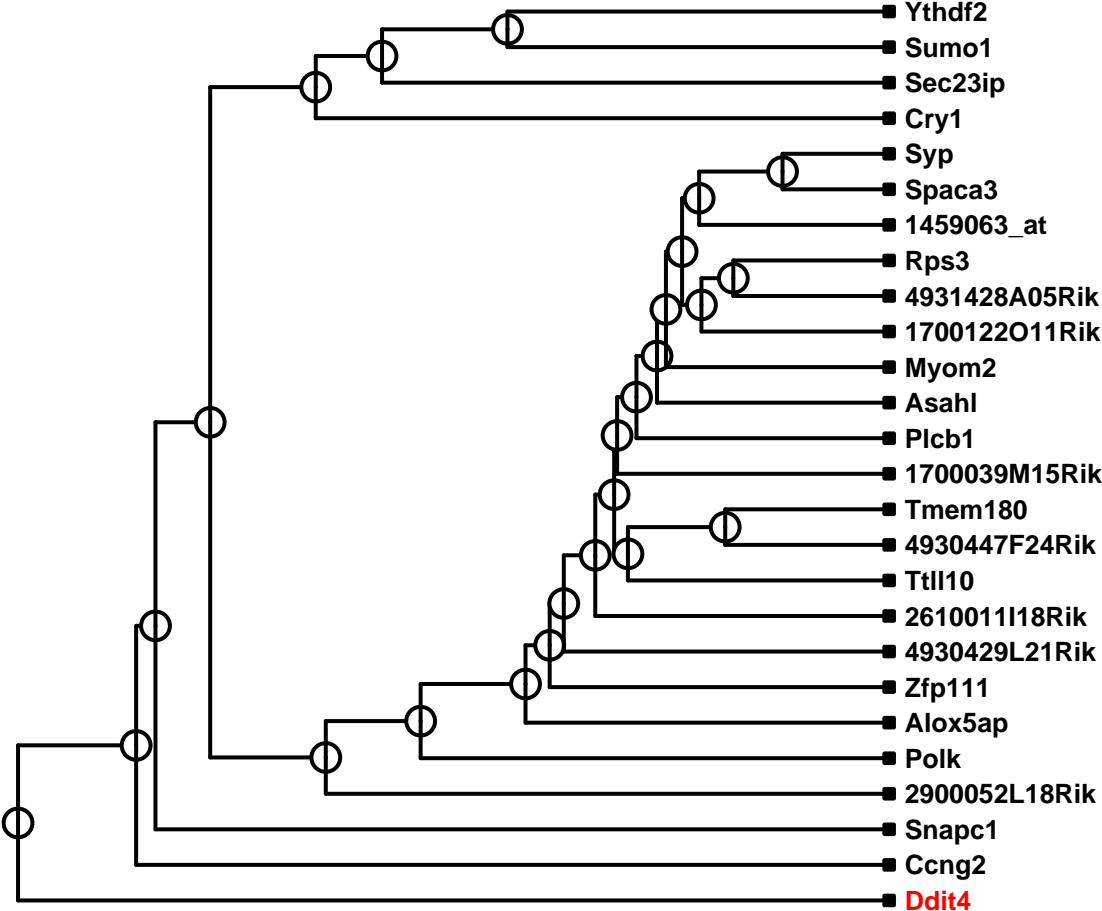

0.4      0.3      0.2      0.1      0.0

# Nfkbia

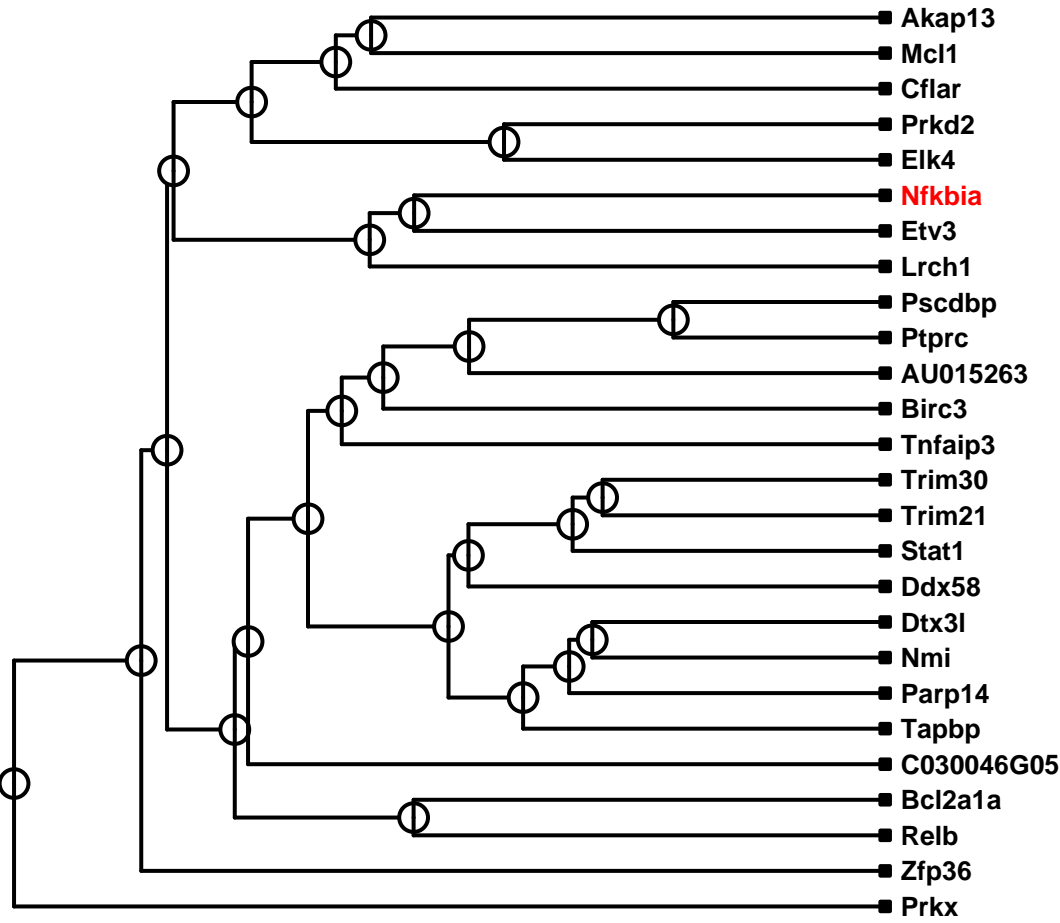

0.4 0.3 0.2 0.1 0.0

# Fkbp5

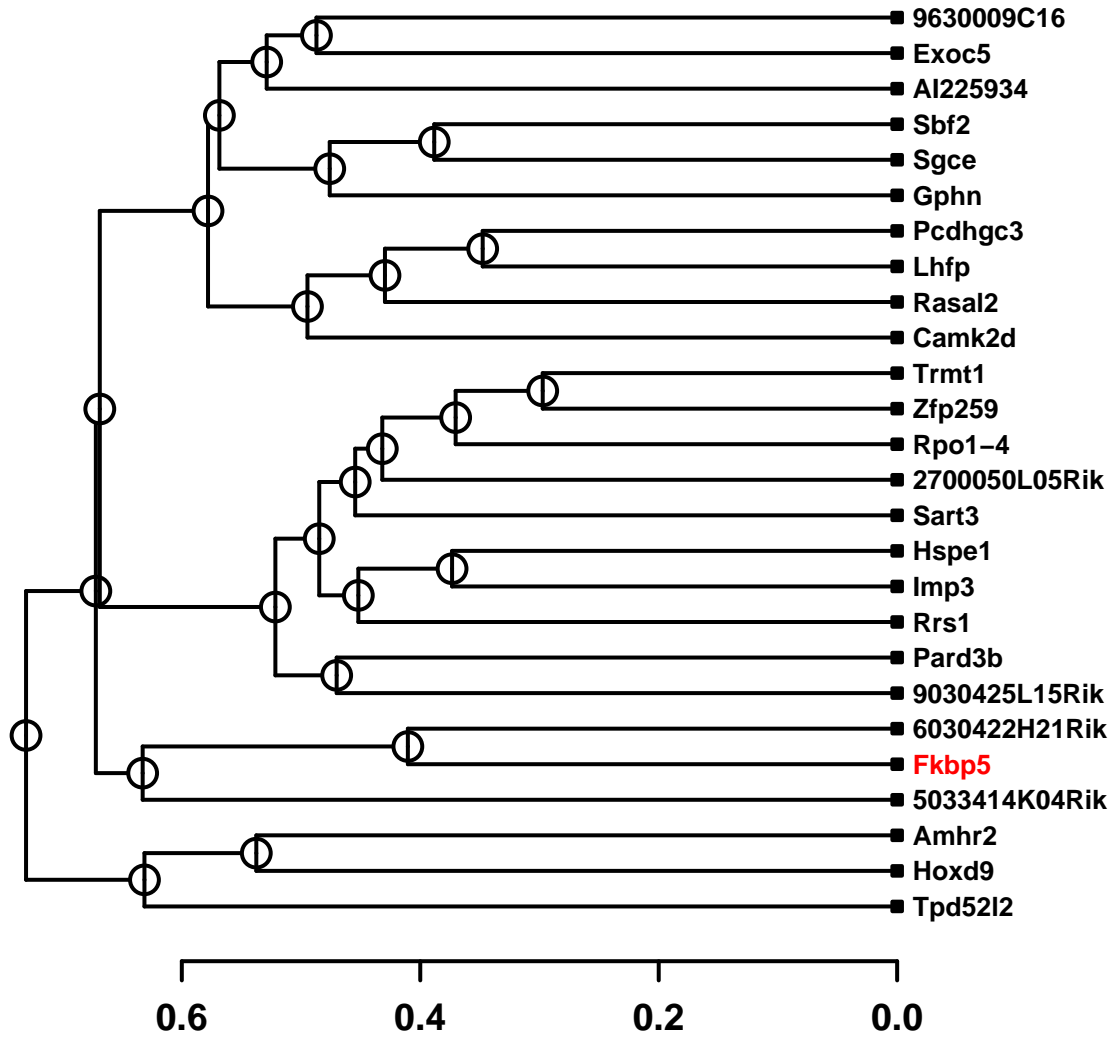

# Peci

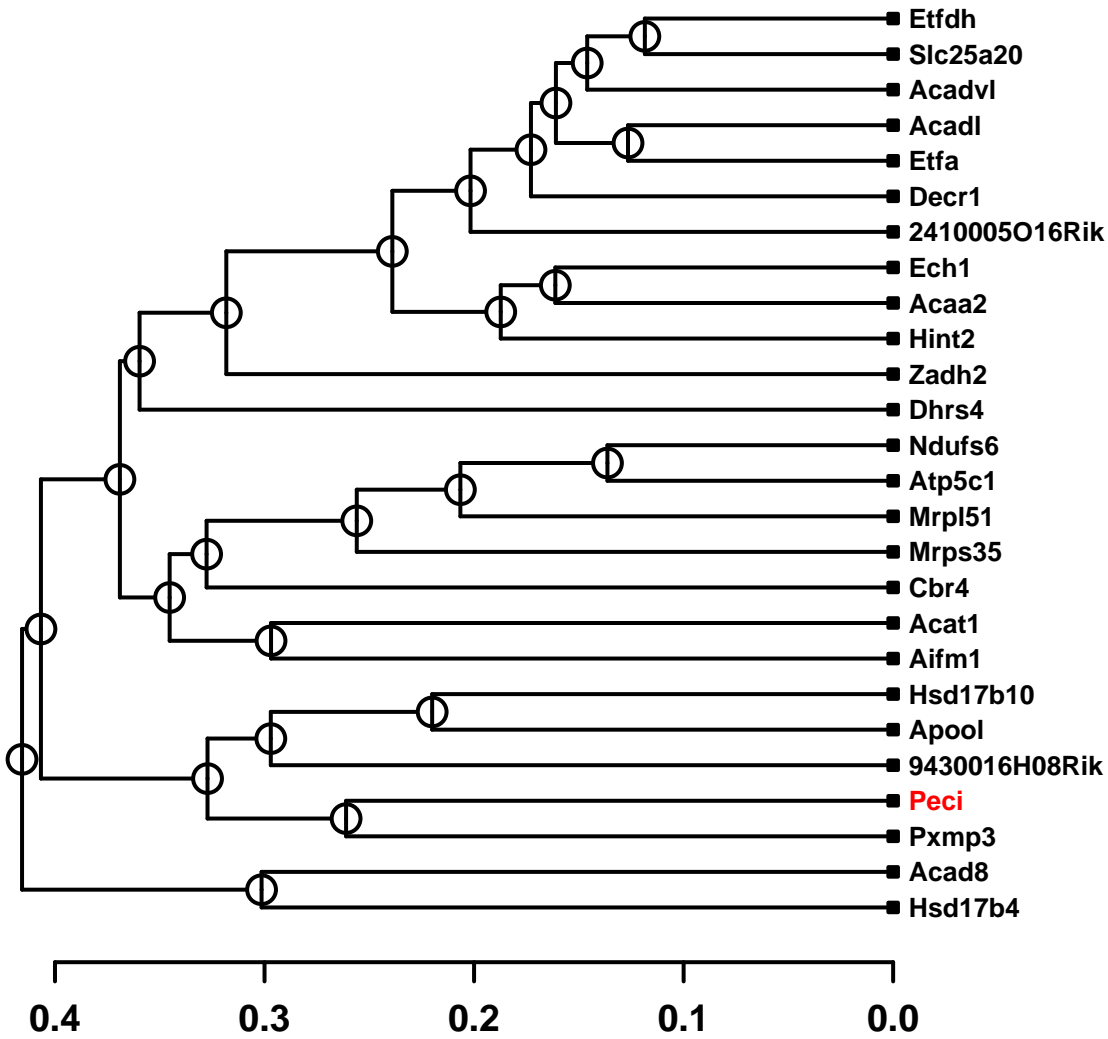



# Rbm3sim

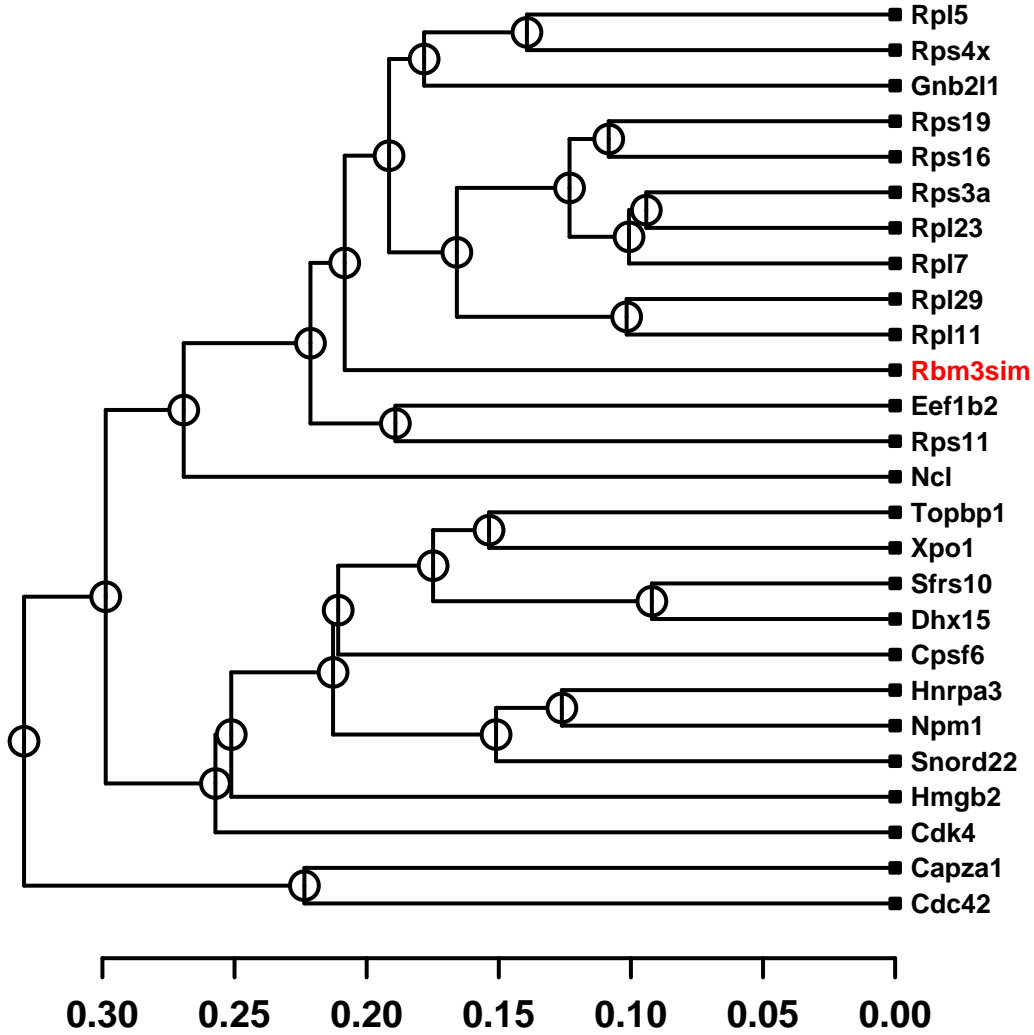

# Pim3

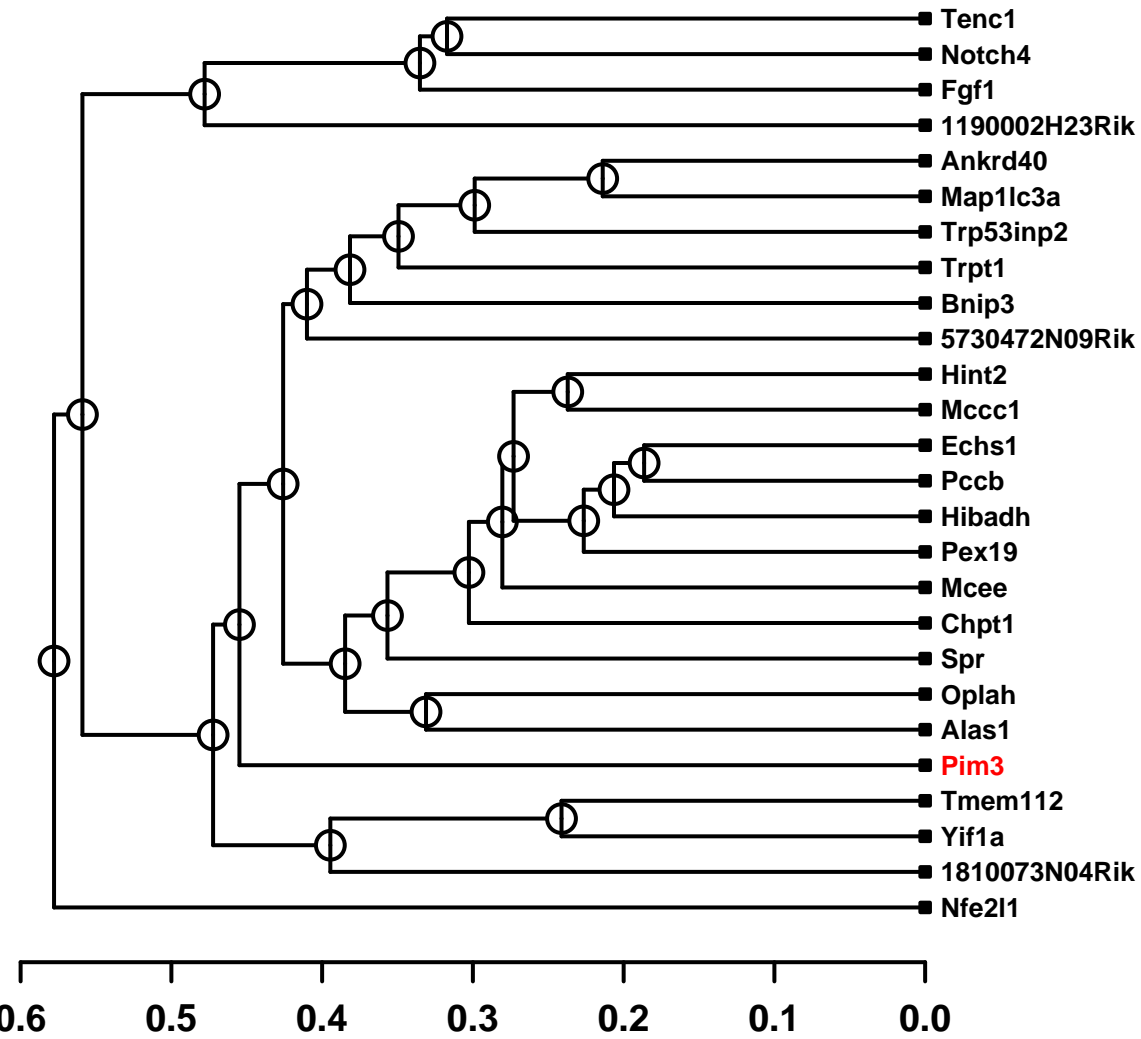

# Tspan4

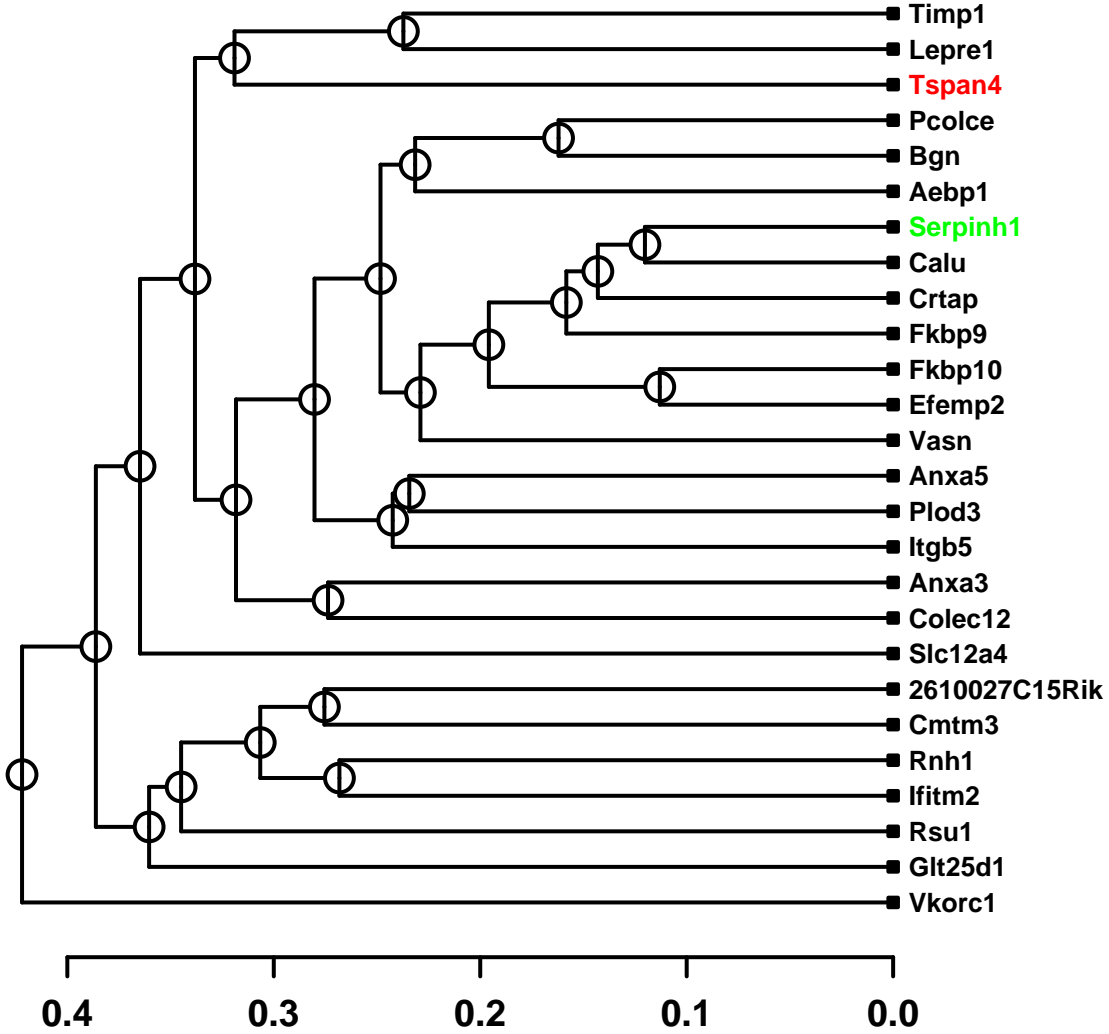

# Cdkn1a

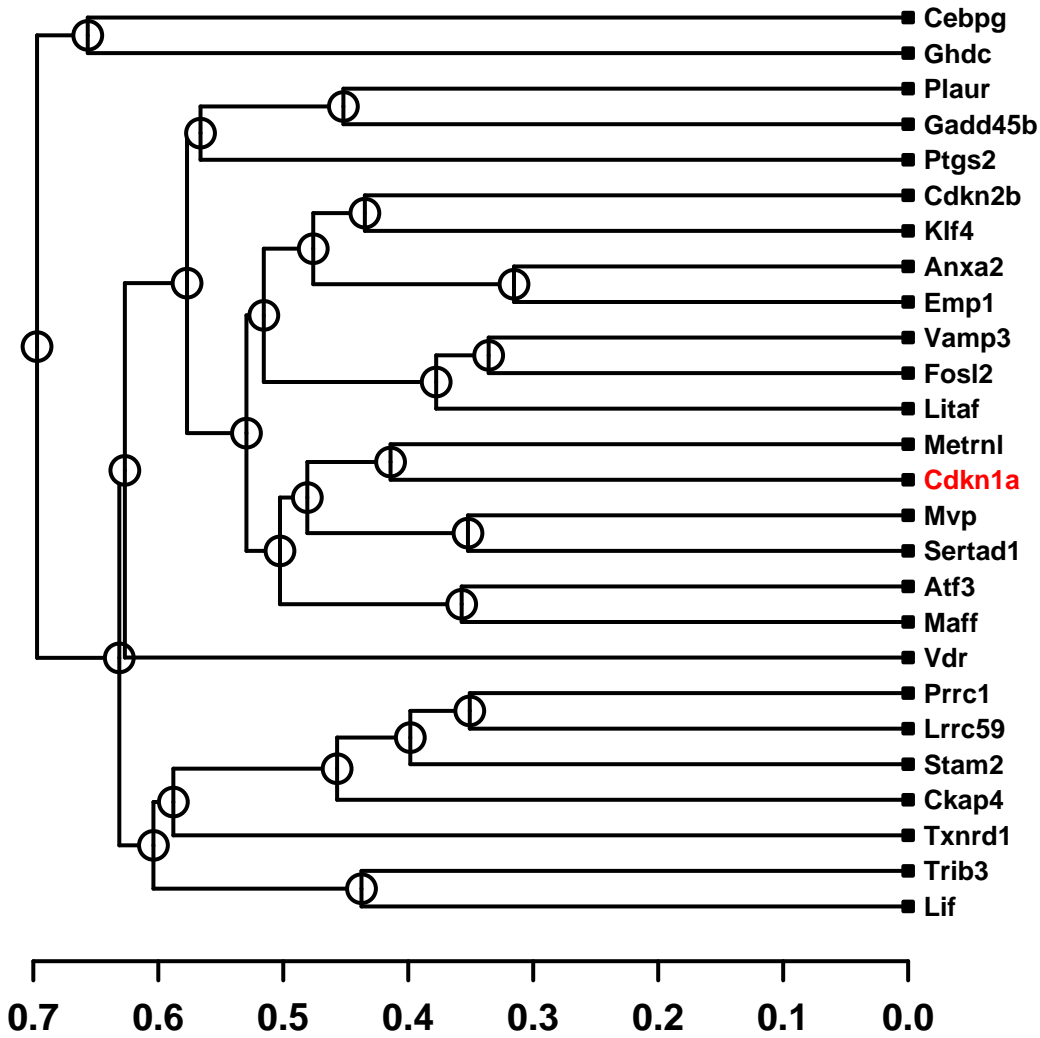

# Pnpla2

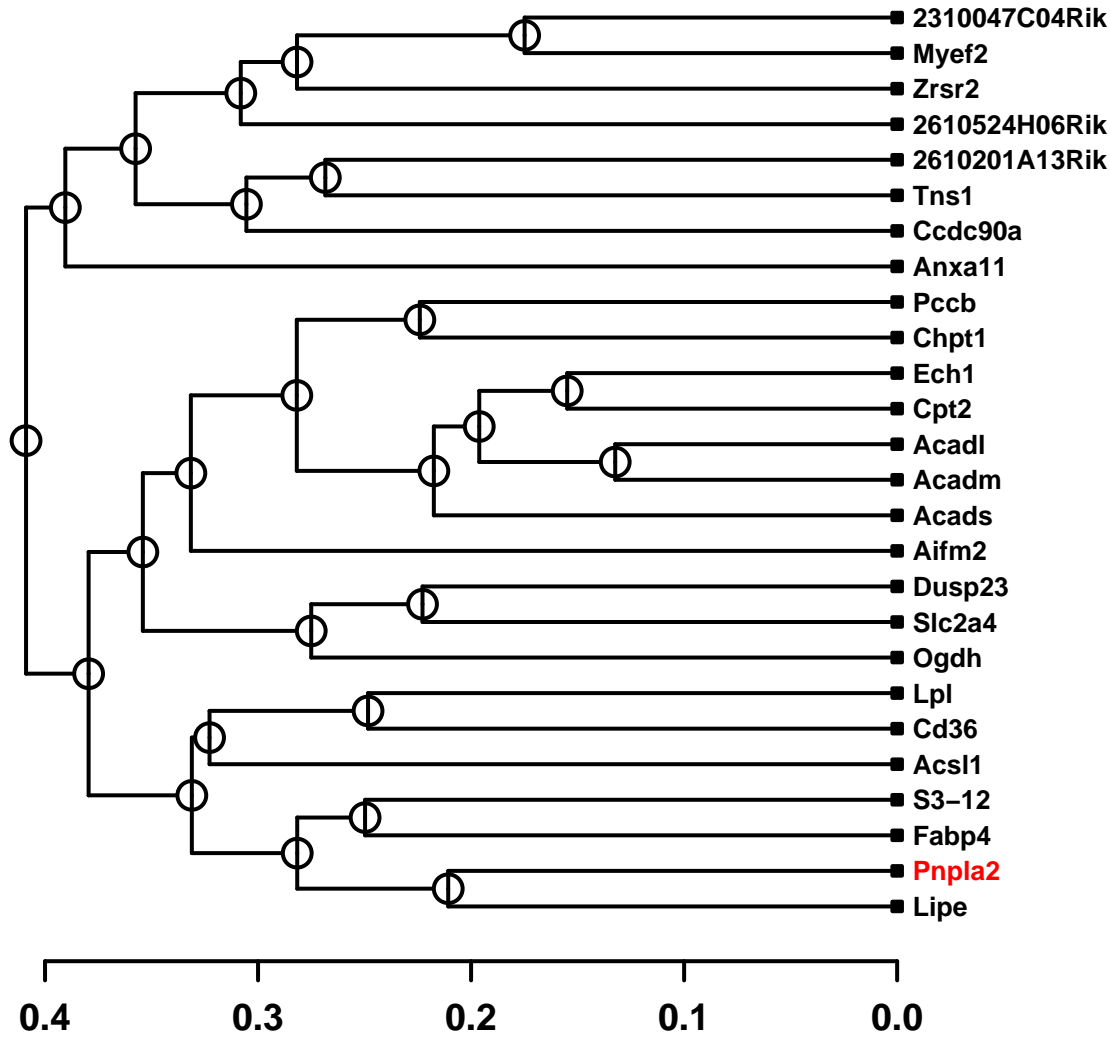

Supplement: NIHMS110370-supplement-3.pdf [file NIHMS110370-supplement-3.pdf]
