# Supplementary material
Source: PubMed Central journal article supplement (PMC2688445)

# Supplemental Data File 5:

## Genes Regulated by Caloric Restriction Have Unique Roles within Transcriptional Networks

*William R. Swindell*

*University of Michigan, Departments of Pathology and Geriatrics*

-----

This file shows plots of correlation order statistics for CR-regulated genes, with respect to each of the four mouse profiling datasets examined in this study (see Figure 4). In each plot, the vertical axis represents the average  $k$ th correlation order statistic (among  $n$  genes) and the horizontal axis corresponds to  $k$ . For a given gene, the  $k$ th correlation order statistic equals the  $k$ th largest correlation between that gene and all other transcripts represented on the Affymetrix Mouse 430 2.0 microarray. Highly connected genes should have a large correlation order statistic for a given value of  $k$ . In part (A), green points represent the average  $k$ th correlation order statistic among the  $n = 12$  CR-downregulated genes. In part (B), red points represent the average  $k$ th correlation order statistic among the  $n = 16$  CR-upregulated genes. In both (A) and (B), dashed black lines outline a 95% confidence region for the average  $k$ th correlation order statistic among  $n$  genes sampled at random (based upon simulation). In 95% of 10,000 simulation trials, random samples of  $n$  genes from the Affymetrix Mouse 430 2.0 array yielded an average  $k$ th correlation order statistic within the dashed lines.

-----

Contact: William R. Swindell, [wswindel@umich.edu](mailto:wswindel@umich.edu)

# Tissue Series

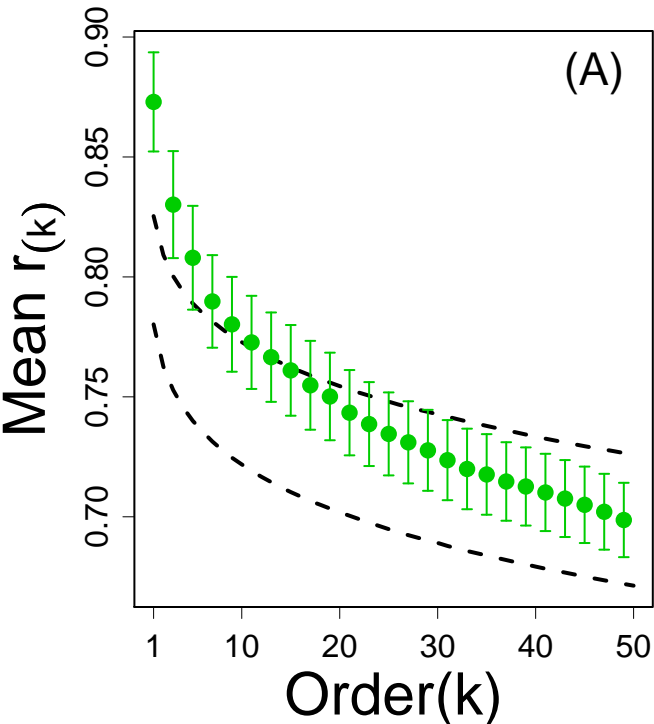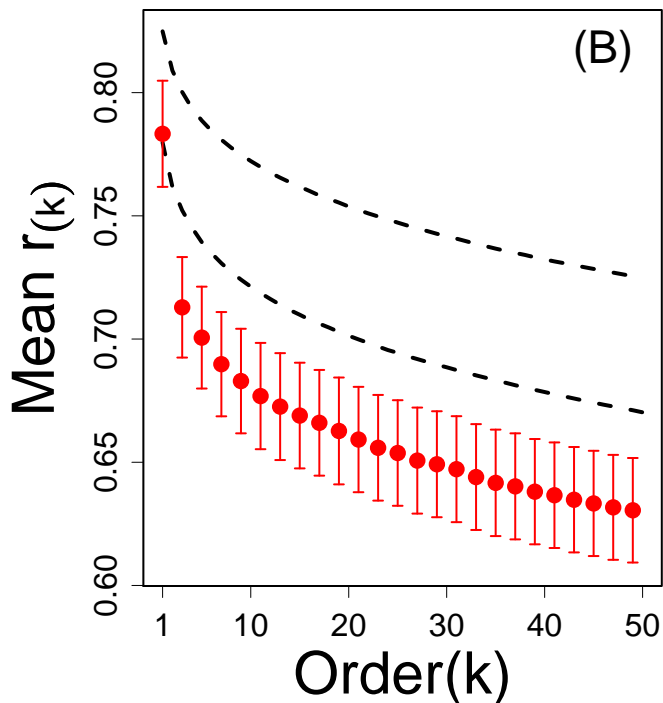

# Developmental Series

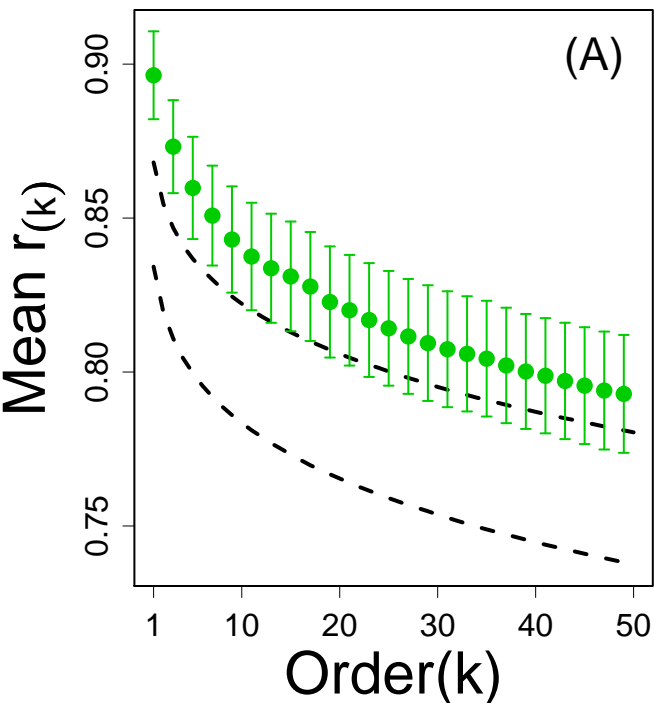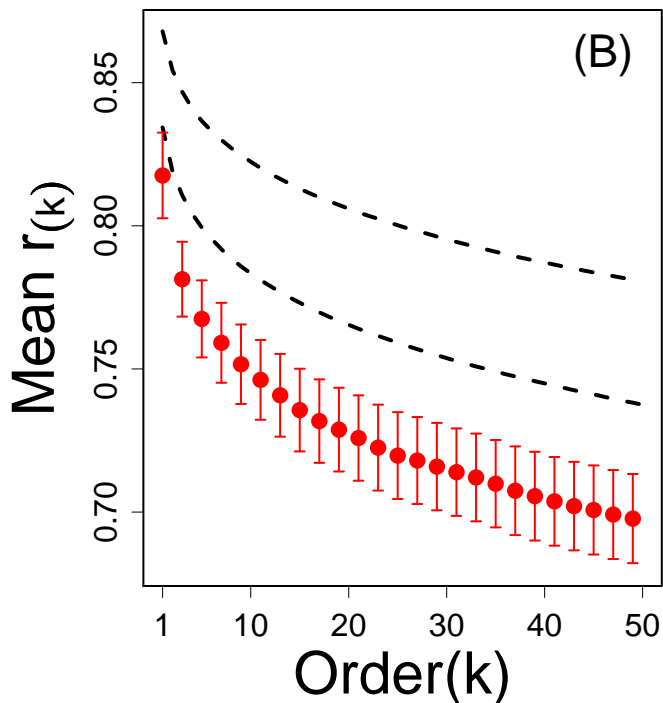

# Treatment Series

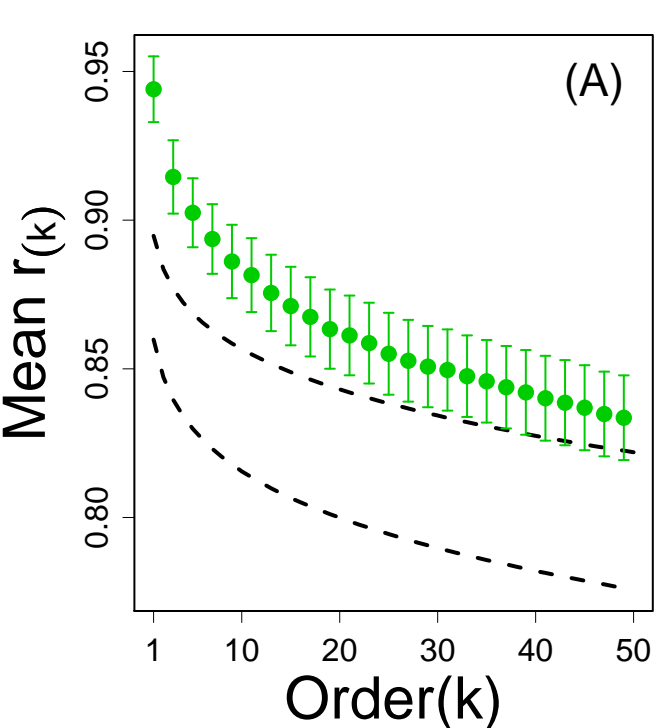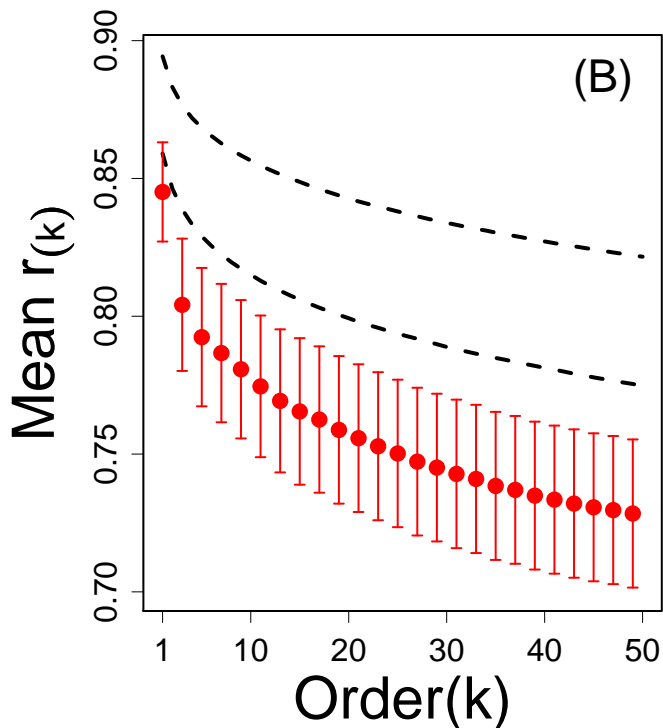

# Mutation Series

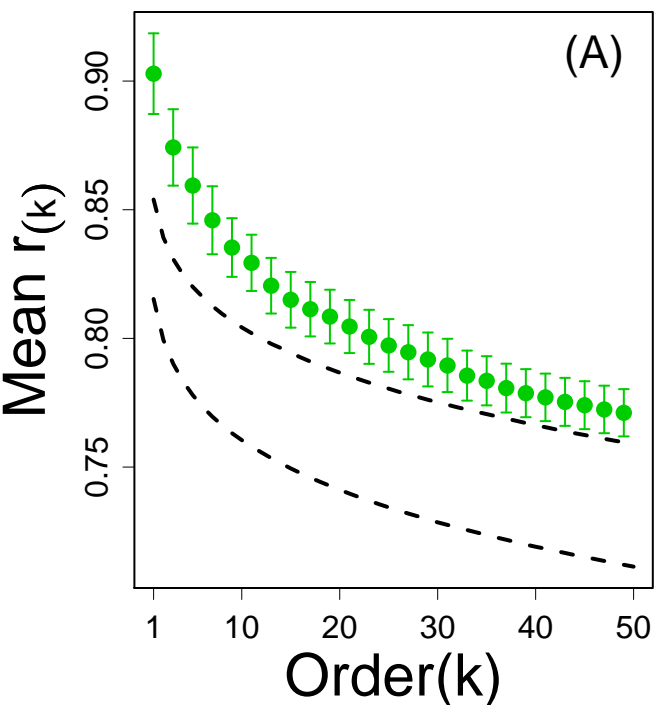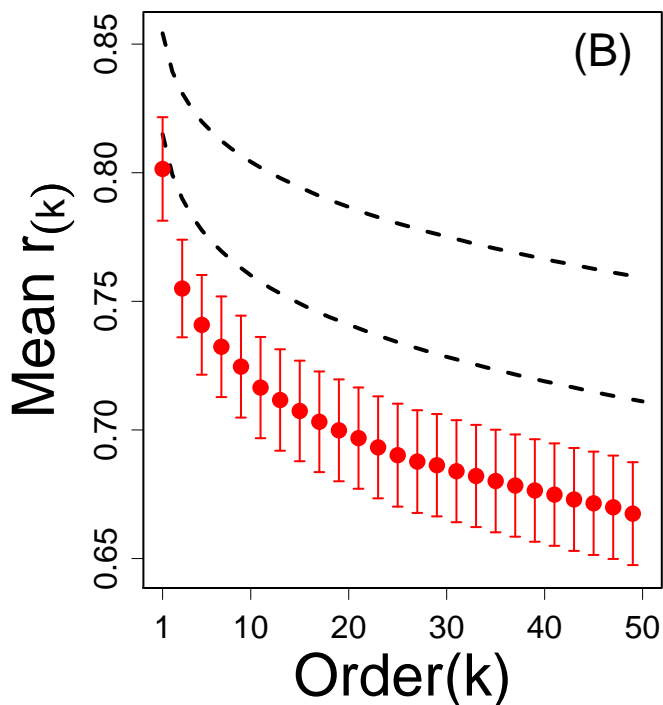

Supplement: NIHMS110370-supplement-5.pdf [file NIHMS110370-supplement-5.pdf]
