# Supplementary material
Source: PubMed Central journal article supplement (PMC2688445)
Supplement: NIHMS110370-supplement-1.pdf [file NIHMS110370-supplement-1.pdf]

# Supplemental Data File 1

## Genes regulated by Caloric Restriction have Unique Roles within Transcriptional Networks

*William R. Swindell*  
*University of Michigan*

---

The Tissue, Developmental, Treatment and Mutation series datasets used to evaluate connectivity and co-expression of CR-regulated genes from mouse are described in this file (see Figures 1 – 7). Datasets used to evaluate connectivity of CR-regulated genes from invertebrate model systems are also described (Drosophila Series A and B, Celegans Series A and B) (see Figure 8). Tables describe the 60 conditions associated with each dataset, including sample sizes per condition and the public database identifier associated with samples. Database identifiers can be used to obtain further details regarding individual experiments (Gene Expression Omnibus: <http://www.ncbi.nlm.nih.gov/geo/>) (ArrayExpress: <http://www.ebi.ac.uk/microarray-as/aer/>).

---

**Contact: William R. Swindell ([wswindel@umich.edu](mailto:wswindel@umich.edu))**

## Tissue Series

| Condition # | GEO     | n | Description         |
|-------------|---------|---|---------------------|
| 1           | GSE8249 | 1 | Ovary               |
| 2           | GSE8249 | 1 | Testis              |
| 3           | GSE8249 | 1 | Adrenal Gland       |
| 4           | GSE8249 | 1 | Placenta            |
| 5           | GSE8249 | 1 | Uterus              |
| 6           | GSE8249 | 1 | Bone Marrow         |
| 7           | GSE8249 | 1 | Spleen              |
| 8           | GSE8249 | 1 | Brain               |
| 9           | GSE8249 | 1 | Eye                 |
| 10          | GSE8249 | 1 | Muscle (Hindlimb)   |
| 11          | GSE8249 | 1 | Heart               |
| 12          | GSE8249 | 1 | Intestine           |
| 13          | GSE8249 | 1 | Kidney              |
| 14          | GSE8249 | 1 | Liver               |
| 15          | GSE8249 | 1 | Lung                |
| 16          | GSE1986 | 1 | Brain               |
| 17          | GSE1986 | 1 | CD4+Naive           |
| 18          | GSE1986 | 1 | EmbryoD7            |
| 19          | GSE1986 | 1 | Eye                 |
| 20          | GSE1986 | 1 | Heart               |
| 21          | GSE1986 | 1 | Kidney              |
| 22          | GSE1986 | 1 | Liver               |
| 23          | GSE1986 | 1 | Lung                |
| 24          | GSE1986 | 1 | Lymph Node          |
| 25          | GSE1986 | 1 | Ovary               |
| 26          | GSE1986 | 1 | Placenta            |
| 27          | GSE1986 | 1 | Muscle              |
| 28          | GSE1986 | 1 | Spleen              |
| 29          | GSE1986 | 1 | Stomach             |
| 30          | GSE1986 | 1 | Submax Gland        |
| 31          | GSE1986 | 1 | Testis              |
| 32          | GSE1986 | 1 | Thymus              |
| 33          | GSE4098 | 8 | Eye (corneal)       |
| 34          | GSE4098 | 8 | Eye (limbal)        |
| 35          | GSE5018 | 1 | Stomach (parietal)  |
| 36          | GSE5018 | 1 | Stomach (zymogenic) |
| 37          | GSE5018 | 1 | Stomach (pit)       |
| 38          | GSE6466 | 3 | Bladder (adult)     |
| 39          | GSE6466 | 3 | Bladder (postnatal) |
| 40          | GSE8044 | 3 | Brown Fat           |
| 41          | GSE8044 | 3 | White Fat           |

|    |         |   |                         |
|----|---------|---|-------------------------|
| 42 | GSE8024 | 3 | Embryonic Stem Cells    |
| 43 | GSE8024 | 3 | Neural Stem Cells       |
| 44 | GSE8024 | 2 | Embryonic fibroblast    |
| 45 | GSE4866 | 5 | Cochlea                 |
| 46 | GSE6867 | 2 | HairBulb                |
| 47 | GSE8771 | 3 | Heart                   |
| 48 | GSE8868 | 2 | Macrophage (spleen)     |
| 49 | GSE8868 | 2 | Macrophage (intestines) |
| 50 | GSE6591 | 3 | Lung                    |
| 51 | GSE6591 | 3 | Lung (aged)             |
| 52 | GSE6019 | 1 | Brain                   |
| 53 | GSE8269 | 4 | Uterus                  |
| 54 | GSE4758 | 6 | Brain                   |
| 55 | GSE6461 | 2 | Muscle (hindlimb)       |
| 56 | GSE6461 | 1 | Muscle (intercostal)    |
| 57 | GSE6461 | 1 | Muscle (forelimb)       |
| 58 | GSE5582 | 3 | Astrocyte (neocortex)   |
| 59 | GSE5582 | 3 | Astrocyte (cerebellum)  |
| 60 | GSE9130 | 3 | Epididymal Fat pads     |

## Developmental Series

| Condition # | GEO     | n | Description           |
|-------------|---------|---|-----------------------|
| 1           | GSE1479 | 3 | Heart E10.5           |
| 2           | GSE1479 | 3 | Heart E11.5           |
| 3           | GSE1479 | 3 | Heart Ventricle E12.5 |
| 4           | GSE1479 | 3 | Heart Atrium E12.5    |
| 5           | GSE1479 | 3 | Heart Ventricle E13.5 |
| 6           | GSE1479 | 3 | Heart Atrium E13.5    |
| 7           | GSE1479 | 3 | Heart Ventricle E14.5 |
| 8           | GSE1479 | 3 | Heart Atrium E14.5    |
| 9           | GSE1479 | 3 | Heart Ventricle E16.5 |
| 10          | GSE1479 | 3 | Heart Atrium E16.6    |
| 11          | GSE1479 | 3 | Heart Ventricle E18.5 |
| 12          | GSE1479 | 3 | Heart Atrium E18.5    |
| 13          | GSE5668 | 3 | Oocytes Immature      |
| 14          | GSE5668 | 3 | Oocytes Mature        |
| 15          | GSE6916 | 2 | Testis E11.5          |
| 16          | GSE6916 | 2 | Testis E12.5          |
| 17          | GSE6916 | 2 | Testis E14.5          |
| 18          | GSE6916 | 2 | Testis E16.5          |
| 19          | GSE6916 | 2 | Testis E18.5          |
| 20          | GSE6916 | 2 | Ovary E11.5           |
| 21          | GSE6916 | 2 | Ovary E12.5           |
| 22          | GSE6916 | 2 | Ovary E14.5           |
| 23          | GSE6916 | 2 | Ovary E16.5           |
| 24          | GSE6916 | 2 | Ovary E18.5           |
| 25          | GSE6998 | 2 | Liver 10weeks         |
| 26          | GSE6998 | 2 | Liver 10.5days(pc)    |
| 27          | GSE6998 | 2 | Liver 11.5days(pc)    |
| 28          | GSE6998 | 2 | Liver 12.5days(pc)    |
| 29          | GSE6998 | 2 | Liver 13.5days(pc)    |
| 30          | GSE6998 | 2 | Liver 14.5days(pc)    |
| 31          | GSE6998 | 2 | Liver 16.5days(pc)    |
| 32          | GSE8065 | 3 | Ileum 4days(pn)       |
| 33          | GSE8065 | 3 | Ileum 7days(pn)       |
| 34          | GSE8065 | 3 | Ileum 9days(pn)       |
| 35          | GSE8065 | 3 | Ileum 11days(pn)      |
| 36          | GSE8065 | 3 | Ileum 24days(pn)      |
| 37          | GSE8065 | 3 | Ileum 32days(pn)      |
| 38          | GSE7430 | 2 | Pancreas E14.5        |
| 39          | GSE7430 | 2 | Pancreas E16.5        |
| 40          | GSE4051 | 4 | Photoreceptor 4wks    |
| 41          | GSE4051 | 4 | Photoreceptor E16     |

|    |         |   |                                     |
|----|---------|---|-------------------------------------|
| 42 | GSE4051 | 4 | Photoreceptor_P10                   |
| 43 | GSE4051 | 4 | Photoreceptor_P2                    |
| 44 | GSE4051 | 4 | Photoreceptor_P6                    |
| 45 | GSE7875 | 2 | Thymocytes_2wks_male                |
| 46 | GSE7875 | 2 | Thymocytes_3wks_male                |
| 47 | GSE7875 | 2 | Thymocytes_3wks_female              |
| 48 | GSE7875 | 2 | Thymocytes_5wks_female              |
| 49 | GSE7685 | 4 | tibial growth plate, zone 1 (E15.5) |
| 50 | GSE7685 | 4 | tibial growth plate, zone 2 (E15.5) |
| 51 | GSE7685 | 4 | tibial growth plate, zone 3 (E15.5) |
| 52 | GSE7164 | 4 | molar tooth                         |
| 53 | GSE7381 | 3 | backskin (E18.5)                    |
| 54 | GSE4774 | 3 | Face_E10.5_Mandibular               |
| 55 | GSE4774 | 3 | Face_E10.5_Maxillary                |
| 56 | GSE2869 | 4 | Trigeminal Ganglion_E13.5           |
| 57 | GSE4230 | 2 | Kidney_E14.5                        |
| 58 | GSE4230 | 2 | Kideny_E18.5                        |
| 59 | GSE3822 | 7 | Metanephric Mesenchyme_E11.5        |
| 60 | GSE3822 | 4 | Ureteric Bud_E11.5                  |

## Treatment Series

| Condition # | GEO     | n | Description                                |
|-------------|---------|---|--------------------------------------------|
| 1           | GSE5140 | 6 | Brain, Creatine (+)                        |
| 2           | GSE5140 | 7 | Brain, Creatine (-)                        |
| 3           | GSE3414 | 3 | Lung, Uninfected                           |
| 4           | GSE3414 | 3 | Lung, Helminth Infection (2 days)          |
| 5           | GSE3414 | 3 | Lung, Helminth Infection (3 days)          |
| 6           | GSE3414 | 3 | Lung, Helminth Infection (4 days)          |
| 7           | GSE3414 | 3 | Lung, Helminth Infection (8days)           |
| 8           | GSE3414 | 3 | Lung, Helminth Infection (12days)          |
| 9           | GSE3440 | 2 | Heart Aldosterone(-)                       |
| 10          | GSE3440 | 2 | Heart Aldosterone(+)                       |
| 11          | GSE8150 | 5 | Brain Young                                |
| 12          | GSE8150 | 5 | Brain Old                                  |
| 13          | GSE8150 | 5 | Brain Old Atocopherol                      |
| 14          | GSE8150 | 5 | Brain Old A+Gtocopherol                    |
| 15          | GSE6476 | 2 | Hippocampus, Fluoxetine Antidepressant (-) |
| 16          | GSE6476 | 2 | Hippocampus Fluoxetine Antidepressant (+)  |
| 17          | GSE7404 | 4 | Blood Burn(+)                              |
| 18          | GSE7404 | 4 | Blood Burn(-)                              |
| 19          | GSE7404 | 4 | Blood Hemorrhage(+)                        |
| 20          | GSE7404 | 4 | Blood Hemorrhage(-)                        |
| 21          | GSE7404 | 4 | Spleen Burn(+)                             |
| 22          | GSE7404 | 4 | Spleen Burn(-)                             |
| 23          | GSE7404 | 4 | Spleen Hemorrhage(+)                       |
| 24          | GSE7404 | 4 | Spleen Hemorrhage(-)                       |
| 25          | GSE9371 | 5 | Aorta Estrogen(-)                          |
| 26          | GSE9371 | 5 | Aorta Estrogen(+)                          |
| 27          | GSE9247 | 4 | Preosteoblasts DMSO                        |
| 28          | GSE9247 | 4 | Preosteoblasts MS275                       |
| 29          | GSE9247 | 3 | Preosteoblasts TSA                         |
| 30          | GSE9247 | 4 | Preosteoblasts VPS                         |
| 31          | GSE6632 | 2 | Liver Control                              |
| 32          | GSE6632 | 2 | Liver Castrated                            |
| 33          | GSE6632 | 2 | Liver Castrated Infected                   |
| 34          | GSE6765 | 5 | Intestines Infected                        |
| 35          | GSE6765 | 4 | Intestines Uninfected                      |
| 36          | GSE9368 | 3 | lung, ventilator-induced injury(-)         |
| 37          | GSE9368 | 3 | lung, ventilator-induced injury(-)         |
| 38          | GSE6514 | 5 | cortex, sleeping                           |
| 39          | GSE6514 | 5 | cortex, sleep deprived                     |
| 40          | GSE6514 | 5 | hypothalamus, sleeping                     |
| 41          | GSE6514 | 5 | hypothalamus, sleep deprived               |

|    |         |   |                          |
|----|---------|---|--------------------------|
| 42 | GSE7823 | 2 | Lung Hypoxic StrainBL6   |
| 43 | GSE7823 | 2 | Lung Hypoxic StrainFVB/N |
| 44 | GSE7823 | 2 | Lung Hypoxic StrainSV129 |
| 45 | GSE5156 | 2 | Intestines Germfree      |
| 46 | GSE5156 | 2 | Intestines Convention    |
| 47 | GSE4695 | 3 | Fibroblasts ET1(-)       |
| 48 | GSE4695 | 3 | Fibroblasts ET1(+)       |
| 49 | GSE8621 | 3 | Macrophages LPS(-,-)     |
| 50 | GSE8621 | 3 | Macrophages LPS(-,+)     |
| 51 | GSE8621 | 3 | Macrophages LPS(+,-)     |
| 52 | GSE8621 | 3 | Macrophages LPS(+,+)     |
| 53 | GSE6810 | 2 | Spleen Uninfected        |
| 54 | GSE6810 | 2 | Spleen Babortus2308      |
| 55 | GSE6810 | 2 | Spleen Babrotus2308BA41  |
| 56 | GSE6810 | 2 | Spleen Babrotus2308ADH42 |
| 57 | GSE6810 | 2 | Spleen Bmelitensis       |
| 58 | GSE7605 | 3 | Heart LPS 3h             |
| 59 | GSE7605 | 3 | Heart PBS 3h             |
| 60 | GSE7605 | 3 | Heart LPS 30min          |

## Mutation Series

| Condition # | GEO     | n | Description          |
|-------------|---------|---|----------------------|
| 1           | GSE7257 | 5 | Kidney Lim1+         |
| 2           | GSE7257 | 4 | Kidney Lim1-         |
| 3           | GSE6398 | 8 | Heart Lmna+          |
| 4           | GSE6398 | 6 | Heart Lmna-          |
| 5           | GSE7196 | 3 | Heart Erra+          |
| 6           | GSE7196 | 3 | Heart Erra-          |
| 7           | GSE7020 | 4 | Spleen Nix-          |
| 8           | GSE7020 | 4 | Spleen Nix+          |
| 9           | GSE2161 | 2 | BasalGanglion Dlx+   |
| 10          | GSE2161 | 2 | BasalGanglion Dlx-   |
| 11          | GSE2161 | 2 | Cortex Dlx+          |
| 12          | GSE2161 | 2 | Cortex Dlx-          |
| 13          | GSE8710 | 2 | HeartValve Cxcr-     |
| 14          | GSE8710 | 2 | HeartValve Cxcr+     |
| 15          | GSE7225 | 3 | Cumulus Bmp15+       |
| 16          | GSE7225 | 3 | Cumulus Bmp15-       |
| 17          | GSE8818 | 2 | Intestines Bcatenin+ |
| 18          | GSE8818 | 2 | Intestines Bcatenin- |
| 19          | GSE6909 | 3 | Placenta Adra2b-     |
| 20          | GSE6909 | 3 | Placenta Adra2b+     |
| 21          | GSE8434 | 3 | Ear Errb+            |
| 22          | GSE8434 | 3 | Ear Errb-            |
| 23          | GSE7958 | 3 | Striatum Q92-        |
| 24          | GSE7958 | 3 | Striatum Q92+        |
| 25          | GSE6934 | 2 | Kidney Wnt4+         |
| 26          | GSE6934 | 2 | Kidney Wnt4-         |
| 27          | GSE6210 | 3 | Liver PGC1beta+      |
| 28          | GSE6210 | 3 | Liver PGC1beta-      |
| 29          | GSE6210 | 3 | Muscle PGC1beta+     |
| 30          | GSE6210 | 3 | Muscle PGC1beta-     |
| 31          | GSE5298 | 4 | AVCcanal Gata4+      |
| 32          | GSE5298 | 4 | AVCcanal Gata4-      |
| 33          | GSE5038 | 3 | MotorNeuron Sod+     |
| 34          | GSE5038 | 3 | MotorNeuron Sod-     |
| 35          | GSE6623 | 3 | HematoStemCell Foxo+ |
| 36          | GSE6623 | 3 | HematoStemCell Foxo- |
| 37          | GSE6623 | 3 | Myeloid Foxo+        |
| 38          | GSE6623 | 3 | Myeloid Foxo-        |
| 39          | GSE7342 | 3 | FetalLiver p38alpha- |
| 40          | GSE7342 | 3 | FetalLiver p38alpha+ |
| 41          | GSE7407 | 2 | Heart Sirt1-         |



|    |         |   |                    |
|----|---------|---|--------------------|
| 42 | GSE7407 | 2 | Heart_Sirt1+       |
| 43 | GSE6980 | 5 | Bcells_Xbp1-       |
| 44 | GSE6980 | 5 | Bcells_Xbp1+       |
| 45 | GSE3100 | 3 | Lung_Cftr+         |
| 46 | GSE3100 | 3 | Lung_Cftr-         |
| 47 | GSE4040 | 3 | Hippocamp_Ppp1r1a+ |
| 48 | GSE4040 | 3 | Hippocamp_Ppp1r1a- |
| 49 | GSE1835 | 2 | Retina_Myoc-       |
| 50 | GSE1835 | 2 | Retina_Myoc+       |
| 51 | GSE2372 | 3 | Aorta_apoE+        |
| 52 | GSE2372 | 3 | Aorta_apoE-        |
| 53 | GSE6030 | 3 | Pineal_NeuroD1+    |
| 54 | GSE6030 | 3 | Pineal_NeuroD1-    |
| 55 | GSE6046 | 2 | Fibroblast_Dicer-  |
| 56 | GSE6046 | 2 | Fibroblast_Dicer+  |
| 57 | GSE9131 | 3 | Adipose_Pparg-     |
| 58 | GSE9131 | 3 | Adipose_Pparg+     |
| 59 | GSE9123 | 4 | Intestines_PlagL2+ |
| 60 | GSE9123 | 4 | Intestines_PlagL2- |

## Drosophila Series A

| Condition # | GEO     | n | Description                                                       |
|-------------|---------|---|-------------------------------------------------------------------|
| 1           | GSE3069 | 3 | third instar larvae -4 hours relative to pupariation EcRi control |
| 2           | GSE3069 | 3 | 0 hour prepupae EcRi control                                      |
| 3           | GSE3069 | 3 | 4 hour prepupae EcRi control                                      |
| 4           | GSE3069 | 3 | third instar larvae -4 hours relative to pupariation EcRi mutant  |
| 5           | GSE3069 | 3 | 0 hour prepupae EcR mutant                                        |
| 6           | GSE3069 | 3 | 4 hour prepupae EcR mutant                                        |
| 7           | GSE3060 | 3 | Organ culture non-treated control                                 |
| 8           | GSE3060 | 3 | Organ culture 20E-treated                                         |
| 9           | GSE3060 | 3 | Organ culture 20E+cycloheximide-treated                           |
| 10          | GSE3060 | 3 | Organ culture cycloheximide-treated                               |
| 11          | GSE2780 | 2 | WT (w1118) control                                                |
| 12          | GSE2780 | 2 | WT (w1118) irradiated                                             |
| 13          | GSE2780 | 2 | Mutant (Dmp53NS) control                                          |
| 14          | GSE2780 | 2 | Mutant (Dmp53NS) irradiated                                       |
| 15          | GSE4188 | 5 | bgn                                                               |
| 16          | GSE4188 | 6 | Os+bgn                                                            |
| 17          | GSE4188 | 5 | wild-type (wt)                                                    |
| 18          | GSE4235 | 3 | WT Migratory cells                                                |
| 19          | GSE4235 | 3 | WT Non-Migratory cells                                            |
| 20          | GSE4235 | 3 | slbo Migratory cells                                              |
| 21          | GSE4235 | 3 | slbo Non-Migratory cells                                          |
| 22          | GSE4174 | 3 | Brain Sleeping 2hr                                                |
| 23          | GSE4174 | 3 | Brain Sleeping 4hr                                                |
| 24          | GSE4174 | 3 | Brain Sleeping 6hr                                                |
| 25          | GSE4174 | 3 | Brain Deprived 2hr                                                |
| 26          | GSE4174 | 3 | Brain Deprived 4hr                                                |
| 27          | GSE4174 | 3 | Brain Deprived 6hr                                                |
| 28          | GSE4174 | 3 | Brain Wake 4hr                                                    |
| 29          | GSE4174 | 3 | Brain ZT10 0hr                                                    |
| 30          | GSE4174 | 3 | Brain ZT14 0hr                                                    |
| 31          | GSE4174 | 3 | Brain APStimulation 4hr                                           |
| 32          | GSE3566 | 3 | RNAi control                                                      |
| 33          | GSE3566 | 3 | Enigma RNAi                                                       |
| 34          | GSE2828 | 3 | Tris 24h                                                          |
| 35          | GSE2828 | 3 | Tris 48h                                                          |
| 36          | GSE2828 | 3 | DCV 24h                                                           |
| 37          | GSE2828 | 3 | DCV 48h                                                           |
| 38          | GSE1690 | 5 | Tubule                                                            |
| 39          | GSE1690 | 3 | WholeFly                                                          |

|    |         |   |                                                                   |
|----|---------|---|-------------------------------------------------------------------|
| 40 | GSE7655 | 2 | E2F                                                               |
| 41 | GSE7655 | 2 | dnE2F                                                             |
| 42 | GSE7655 | 2 | E2F2                                                              |
| 43 | GSE7655 | 2 | Rbf                                                               |
| 44 | GSE7655 | 2 | Dp Mutant                                                         |
| 45 | GSE7655 | 2 | E2F 8-10 hrs mutant                                               |
| 46 | GSE7655 | 2 | yw 14-16 hrs                                                      |
| 47 | GSE7655 | 2 | E2F 14-16 hrs mutant                                              |
| 48 | GSE6655 | 2 | courtship exposed                                                 |
| 49 | GSE6655 | 3 | not exposed to courtship                                          |
| 50 | GSE7159 | 3 | MnSOD transgenic line -DOX at 50% survival                        |
| 51 | GSE7159 | 4 | MnSOD transgenic line +DOX at -DOX 50% survival                   |
| 52 | GSE7159 | 4 | MnSOD transgenic line +DOX 50% survival                           |
| 53 | GSE7159 | 4 | Control -DOX at 50% survival                                      |
| 54 | GSE7159 | 4 | Control +DOX at -DOX 50% survival                                 |
| 55 | GSE9889 | 4 | stage13 mef2(65)                                                  |
| 56 | GSE9889 | 4 | stage13 mef2(424)                                                 |
| 57 | GSE9889 | 4 | stage13 mef2(113)                                                 |
| 58 | GSE9889 | 4 | stage13 mef2(Null)                                                |
| 59 | GSE9889 | 4 | stage13 control                                                   |
| 60 | GSE9889 | 4 | third instar larvae -4 hours relative to pupariation EcRi control |

## Drosophila Series B

| Condition # | GEO / ArrayExpress | n | Description                                           |
|-------------|--------------------|---|-------------------------------------------------------|
| 1           | GSE2422            | 3 | WT(1)                                                 |
| 2           | GSE2422            | 3 | Tim-MJD                                               |
| 3           | GSE3854            | 3 | EGFR gain of function                                 |
| 4           | GSE3854            | 3 | FGFR gain of function                                 |
| 5           | GSE6300            | 3 | GMR>RasV12, biological                                |
| 6           | GSE6300            | 3 | GMR>sSpi, biological                                  |
| 7           | GSE9001            | 2 | Y/W_Female_Drosophila melanogaster_JHIII_topical      |
| 8           | GSE7772            | 2 | Wild type embryos                                     |
| 9           | GSE7772            | 2 | how GLC embryos                                       |
| 10          | GSE5321            | 2 | CS control                                            |
| 11          | GSE5321            | 3 | Otd mutant                                            |
| 12          | GSE6558            | 3 | Control line biological                               |
| 13          | GSE6558            | 3 | Heat selected line biological                         |
| 14          | GSE6558            | 3 | Constant 30 line biological                           |
| 15          | GSE6558            | 3 | Cold selected line biological                         |
| 16          | GSE6558            | 3 | Longevity selected line biological                    |
| 17          | GSE6558            | 3 | Knock down selected line biological                   |
| 18          | GSE6558            | 3 | Starvation selected line biological                   |
| 19          | GSE6558            | 3 | Desiccation selected line biological                  |
| 20          | GSE5984            | 4 | Mutant larvae                                         |
| 21          | GSE5984            | 3 | Wt larvae                                             |
| 22          | GSE6420            | 2 | LARK overexpression adult head                        |
| 23          | GSE6420            | 3 | elavGal4 adult head                                   |
| 24          | GSE6418            | 2 | Brain immunoprecipitated with anti-LARK               |
| 25          | GSE6418            | 2 | Brain totalRNA no immunoprecipitation                 |
| 26          | GSE10781           | 3 | Drosophila RasV12                                     |
| 27          | GSE10781           | 4 | Drosophila CL8                                        |
| 28          | GSE3057            | 3 | third instar larvae -18 hours relative to pupariation |
| 29          | GSE3057            | 3 | third instar larvae -4 hours relative to pupariation  |
| 30          | GSE3057            | 3 | 0 hour prepupae                                       |
| 31          | GSE3057            | 3 | 2 hour prepupae                                       |
| 32          | GSE3057            | 3 | 4 hour prepupae                                       |
| 33          | GSE3057            | 3 | 6 hour prepupae                                       |
| 34          | GSE3057            | 3 | 8 hour prepupae                                       |
| 35          | GSE3057            | 3 | 10 hour prepupae                                      |
| 36          | GSE3057            | 3 | 12 hour pupae                                         |
| 37          | E-MEXP-152         | 4 | Control Treatment                                     |
| 38          | E-MEXP-152         | 4 | paraquat                                              |

|    |             |   |                                  |
|----|-------------|---|----------------------------------|
| 39 | E-MEXP-152  | 2 | hydrogen                         |
| 40 | E-MEXP-152  | 2 | tunicamycin                      |
| 41 | E-MEXP-1287 | 4 | injury 1h                        |
| 42 | E-MEXP-1287 | 2 | injury 6h                        |
| 43 | E-MEXP-1287 | 2 | injury 12h                       |
| 44 | E-MEXP-1287 | 2 | PA14 inoculation 1h              |
| 45 | E-MEXP-1287 | 2 | PA14 inoculation 6h              |
| 46 | E-MEXP-1287 | 2 | PA14 inoculation 12h             |
| 47 | E-MEXP-1287 | 4 | CF5 inoculation 1h               |
| 48 | E-MEXP-1287 | 2 | CF5 inoculation 6h               |
| 49 | E-MEXP-1287 | 2 | CF5 inoculation 12h              |
| 50 | E-MEXP-1287 | 2 | abdominal CF5 inoculation 1h     |
| 51 | E-MEXP-1287 | 2 | abdominal PA14 inoculation 1h    |
| 52 | E-MEXP-1287 | 4 | untreated 0h                     |
| 53 | E-MEXP-1287 | 2 | 2xPA14:CF5 double inoculation 1h |
| 54 | E-MEXP-1287 | 2 | PA14:CF5 double inoculation 1h   |
| 55 | E-MEXP-1287 | 2 | abdominal injury 1h              |
| 56 | GSE6515     | 4 | FRM, stage15                     |
| 57 | GSE6515     | 4 | UC, stage15                      |
| 58 | GSE6515     | 5 | UC2x, stage15                    |
| 59 | GSE6515     | 5 | UNC5, stage15                    |
| 60 | GSE6515     | 4 | UR, stage15                      |

## Caelegans Series A

| Condition # | GEO / ArrayExpress | n | Description                                                                                            |
|-------------|--------------------|---|--------------------------------------------------------------------------------------------------------|
| 1           | GSE2180            | 3 | Strain N2 (wild type) 0 minutes after the 4-cell embryonic stage at 22 degrees C                       |
| 2           | GSE2180            | 4 | Strain N2 (wild type) 23 minutes after the 4-cell embryonic stage at 22 degrees C                      |
| 3           | GSE2180            | 3 | Strain N2 (wild type) 41 minutes after the 4-cell embryonic stage at 22 degrees C                      |
| 4           | GSE2180            | 4 | Strain N2 (wild type) 53 minutes after the 4-cell embryonic stage at 22 degrees C                      |
| 5           | GSE2180            | 4 | Strain N2 (wild type) 83 minutes after the 4-cell embryonic stage at 22 degrees C                      |
| 6           | GSE2180            | 3 | Strain N2 (wild type) 101 minutes after the 4-cell embryonic stage at 22 degrees C                     |
| 7           | GSE2180            | 3 | Strain N2 (wild type) 122 minutes after the 4-cell embryonic stage at 22 degrees C                     |
| 8           | GSE2180            | 3 | Strain N2 (wild type) 143 minutes after the 4-cell embryonic stage at 22 degrees C                     |
| 9           | GSE2180            | 3 | Strain N2 (wild type) 186 minutes after the 4-cell embryonic stage at 22 degrees C                     |
| 10          | GSE2180            | 3 | Mutant genotype mex-3(zu155); skn-1(RNAi) 0 minutes after the 4-cell embryonic stage at 22 degrees C   |
| 11          | GSE2180            | 2 | Mutant genotype mex-3(zu155); skn-1(RNAi) 23 minutes after the 4-cell embryonic stage at 22 degrees C  |
| 12          | GSE2180            | 3 | Mutant genotype mex-3(zu155); skn-1(RNAi) 41 minutes after the 4-cell embryonic stage at 22 degrees C  |
| 13          | GSE2180            | 2 | Mutant genotype mex-3(zu155); skn-1(RNAi) 53 minutes after the 4-cell embryonic stage at 22 degrees C  |
| 14          | GSE2180            | 4 | Mutant genotype mex-3(zu155); skn-1(RNAi) 83 minutes after the 4-cell embryonic stage at 22 degrees C  |
| 15          | GSE2180            | 2 | Mutant genotype mex-3(zu155); skn-1(RNAi) 101 minutes after the 4-cell embryonic stage at 22 degrees C |
| 16          | GSE2180            | 4 | Mutant genotype mex-3(zu155); skn-1(RNAi) 122 minutes after the 4-cell embryonic stage at 22 degrees C |
| 17          | GSE2180            | 2 | Mutant genotype mex-3(zu155); skn-1(RNAi) 143 minutes after the 4-cell embryonic stage at 22 degrees C |

|    |         |   |                                                                                                        |
|----|---------|---|--------------------------------------------------------------------------------------------------------|
| 18 | GSE2180 | 4 | Mutant genotype mex-3(zu155); skn-1(RNAi) 186 minutes after the 4-cell embryonic stage at 22 degrees C |
| 19 | GSE2180 | 2 | Mutant genotype pie-1(zu154) 0 minutes after the 4-cell embryonic stage at 22 degrees C                |
| 20 | GSE2180 | 3 | Mutant genotype pie-1(zu154) 23 minutes after the 4-cell embryonic stage at 22 degrees C               |
| 21 | GSE2180 | 3 | Mutant genotype pie-1(zu154) 41 minutes after the 4-cell embryonic stage at 22 degrees C               |
| 22 | GSE2180 | 3 | Mutant genotype pie-1(zu154) 66 minutes after the 4-cell embryonic stage at 22 degrees C               |
| 23 | GSE2180 | 3 | Mutant genotype pie-1(zu154) 101 minutes after the 4-cell embryonic stage at 22 degrees C              |
| 24 | GSE2180 | 3 | Mutant genotype pie-1(zu154) 122 minutes after the 4-cell embryonic stage at 22 degrees C              |
| 25 | GSE2180 | 3 | Mutant genotype pie-1(zu154) 143 minutes after the 4-cell embryonic stage at 22 degrees C              |
| 26 | GSE2180 | 3 | Mutant genotype pie-1(zu154) 186 minutes after the 4-cell embryonic stage at 22 degrees C              |
| 27 | GSE2180 | 4 | Mutant genotype pie-1(zu154); pal-1(RNAi) 0 minutes after the 4-cell embryonic stage at 22 degrees C   |
| 28 | GSE2180 | 3 | Mutant genotype pie-1(zu154); pal-1(RNAi) 23 minutes after the 4-cell embryonic stage at 22 degrees C  |
| 29 | GSE2180 | 4 | Mutant genotype pie-1(zu154); pal-1(RNAi) 41 minutes after the 4-cell embryonic stage at 22 degrees C  |
| 30 | GSE2180 | 3 | Mutant genotype pie-1(zu154); pal-1(RNAi) 53 minutes after the 4-cell embryonic stage at 22 degrees C  |
| 31 | GSE2180 | 4 | Mutant genotype pie-1(zu154); pal-1(RNAi) 66 minutes after the 4-cell embryonic stage at 22 degrees C  |
| 32 | GSE2180 | 3 | Mutant genotype pie-1(zu154); pal-1(RNAi) 83 minutes after the 4-cell embryonic stage at 22 degrees C  |
| 33 | GSE2180 | 4 | Mutant genotype pie-1(zu154); pal-1(RNAi) 122 minutes after the 4-cell embryonic stage at 22 degrees C |
| 34 | GSE2180 | 3 | Mutant genotype pie-1(zu154); pal-1(RNAi) 143 minutes after the 4-cell embryonic stage at 22 degrees C |
| 35 | GSE2180 | 4 | Mutant genotype pie-1(zu154); pal-1(RNAi) 186 minutes after the 4-cell embryonic stage at 22 degrees C |

|    |            |   |                                            |
|----|------------|---|--------------------------------------------|
| 36 | GSE9665    | 2 | mex-3 (zu155) mutant, control, id 143      |
| 37 | GSE9665    | 2 | mex-3 (zu155) mutant, control, id 230      |
| 38 | GSE9665    | 2 | mex-3 (zu155) mutant, scrt-1 RNAi, id 143  |
| 39 | GSE9665    | 3 | mex-3 (zu155) mutant, elt-1 RNAi, id 143   |
| 40 | GSE9665    | 3 | mex-3 (zu155) mutant, vab-7 RNAi, id 186   |
| 41 | GSE9665    | 2 | mex-3 (zu155) mutant, hlh-1 RNAi, id 186   |
| 42 | GSE9665    | 2 | mex-3 (zu155) mutant, hlh-1 RNAi, id 230   |
| 43 | GSE9665    | 3 | mex-3 (zu155) mutant, nhr-25 RNAi, id 186  |
| 44 | GSE9665    | 3 | mex-3 (zu155) mutant, nob-1 RNAi, id 186   |
| 45 | GSE9665    | 3 | mex-3 (zu155) mutant, unc-120 RNAi, id 120 |
| 46 | GSE9665    | 3 | mex-3 (zu155) mutant, hnd-1 RNAi, id 143   |
| 47 | GSE9665    | 2 | mex-3 (zu155) mutant, lin-26 RNAi, id 186  |
| 48 | GSE9665    | 2 | mex-3 (zu155) mutant, lin-26 RNAi, id 230  |
| 49 | GSE9665    | 3 | mex-3 (zu155) mutant, pal-1 RNAi, id 143   |
| 50 | GSE9665    | 2 | mex-3 (zu155) mutant, pal-1 RNAi, id 230   |
| 51 | E-MEXP-956 | 4 | Adult, rde-1 mutant                        |
| 52 | E-MEXP-956 | 4 | Adult, red-4 mutant                        |
| 53 | E-MEXP-956 | 4 | Adult, N2 Bristol wildtype                 |
| 54 | E-MEXP-957 | 3 | Adult, unc-32(e189);dcr-1(ok247)           |
| 55 | E-MEXP-957 | 3 | Adult, unc-32(e189)                        |
| 56 | E-MEXP-687 | 3 | L2 stage, wild type                        |
| 57 | E-MEXP-687 | 2 | L2 stage, dbl-1 loss of function mutant    |
| 58 | E-MEXP-687 | 3 | L2 stage, sma-9 loss of function mutant    |
| 59 | E-MEXP-696 | 3 | L3 stage, control                          |
| 60 | E-MEXP-696 | 3 | L3 stage, <i>M. Nematophilum</i> infection |



## Caenorhabditis elegans Series B

| Condition # | GEO     | n | Description                                      |
|-------------|---------|---|--------------------------------------------------|
| 1           | GSE2210 | 2 | tom-1(nu468) mutant, whole body, stage 4 larvae  |
| 2           | GSE2210 | 4 | wild type, whole body, stage 4 larvae            |
| 3           | GSE2210 | 3 | unc-43(n1186) mutant, whole body, stage 4 larvae |
| 4           | GSE8231 | 3 | embryonic muscle, HLH-1 induction 0 hr           |
| 5           | GSE8231 | 3 | embryonic muscle, HLH-1 induction 2 hr           |
| 6           | GSE8231 | 3 | embryonic muscle, HLH-1 induction 4 hr           |
| 7           | GSE8231 | 3 | embryonic muscle, HLH-1 induction 6 hr           |
| 8           | GSE9485 | 5 | wildtype neurons (mid-L2)                        |
| 9           | GSE9485 | 3 | wildtype whole body (mid-L2)                     |
| 10          | GSE9301 | 4 | TJ1090 strain, unstressed                        |
| 11          | GSE9301 | 4 | TJ1090 strain, oxidative stress                  |
| 12          | GSE9301 | 3 | TJ1090 strain, oxidative stress, skn-1 RNAi      |
| 13          | GSE8659 | 3 | N2 strain, whole body, stage 4 larvae            |
| 14          | GSE8659 | 3 | rrf-3 mutant, whole body, stage 4 larvae         |
| 15          | GSE8659 | 3 | eri-1 mutant, whole body, stage 4 larvae         |
| 16          | GSE8462 | 3 | N2, embryonic cells, 0 hrs. in culture           |
| 17          | GSE8462 | 3 | N2, embryonic muscle, 0 hrs. in culture          |
| 18          | GSE8462 | 4 | N2, embryonic cells, 24 hrs. in culture          |
| 19          | GSE8462 | 3 | N2, embryonic muscle, 24 hrs. in culture         |
| 20          | GSE8004 | 4 | wild type, embryonic whole body                  |
| 21          | GSE8004 | 3 | wild type, embryonic neurons                     |
| 22          | GSE8004 | 5 | wild type, larval whole body                     |
| 23          | GSE8004 | 3 | wild type, larval neurons                        |
| 24          | GSE8004 | 4 | wild type, mid-L2, A-class neurons               |
| 25          | GSE8004 | 5 | wild type, mid-L2, whole body                    |
| 26          | GSE8159 | 4 | wild type, embryonic whole body                  |
| 27          | GSE8159 | 3 | wild type, embryonic, A-class neurons            |
| 28          | GSE4766 | 3 | glp-1 embryos, strain JK1107                     |
| 29          | GSE4766 | 3 | glp-1 young adults, strain JK1107                |
| 30          | GSE4766 | 2 | glp-1 old adults, strain JK1107                  |
| 31          | GSE6547 | 3 | N2 wild type, L1 stage                           |
| 32          | GSE6547 | 3 | lin-35(n745), L1 stage                           |
| 33          | GSE6547 | 3 | N2 wild type, L4 stage                           |
| 34          | GSE6547 | 3 | lin-35(n745), L4 stage                           |
| 35          | GSE6547 | 3 | N2 wild type, embryonic                          |
| 36          | GSE6547 | 3 | lin-35(n745), embryonic                          |
| 37          | GSE5793 | 3 | 4 hrs on E.coli strain OP50, whole body          |
| 38          | GSE5793 | 3 | 8 hrs on E.coli strain OP50, whole body          |
| 39          | GSE5793 | 3 | 4 hrs on P. aeruginosa PA14 mutant strain gacA   |
| 40          | GSE5793 | 3 | 8 hrs on P. aeruginosa PA14 mutant strain gacA   |
| 41          | GSE5793 | 3 | 4 hrs on P. aeruginosa                           |

|    |         |   |                                                 |
|----|---------|---|-------------------------------------------------|
| 42 | GSE5793 | 3 | 8 hrs on <i>P. aeruginosa</i>                   |
| 43 | GSE5801 | 3 | daf-2(e1368), late L4/young adult, whole animal |
| 44 | GSE5801 | 3 | daf-2(e1368);daf-16(mgDf47), L4, whole animal   |
| 45 | GSE5801 | 3 | daf-2(e1368);pmk-1(km25), L4, whole animal      |
| 46 | GSE6563 | 2 | daf19(m86) daf12(sa204)                         |
| 47 | GSE6563 | 2 | daf19(WT) daf12(sa204)                          |
| 48 | GSE7354 | 1 | whole animal, nucleus accumbens, Ce-imp-2 RNAi  |
| 49 | GSE7354 | 1 | whole animal, nucleus accumbens, control        |
| 50 | GSE9665 | 2 | mex-3 (zu155) mutant, control, id 186           |
| 51 | GSE9665 | 3 | mex-3 (zu155) mutant, scrt-1 RNAi, id 186       |
| 52 | GSE9665 | 3 | mex-3 (zu155) mutant, tbx-8, 9 RNAi, id 143     |
| 53 | GSE9665 | 3 | mex-3 (zu155) mutant, elt-1 RNAi, id 186        |
| 54 | GSE9665 | 3 | mex-3 (zu155) mutant, vab-7 RNAi, id 230        |
| 55 | GSE9665 | 3 | mex-3 (zu155) mutant, nhr-25 RNAi, id 230       |
| 56 | GSE9665 | 3 | mex-3 (zu155) mutant, elt-3 RNAi, id 230        |
| 57 | GSE9665 | 3 | mex-3 (zu155) mutant, nob-1 RNAi, id 230        |
| 58 | GSE9665 | 3 | mex-3 (zu155) mutant, unc-120 RNAi, id 230      |
| 59 | GSE9665 | 3 | mex-3 (zu155) mutant, hnd-1 RNAi, id 186        |
| 60 | GSE9665 | 3 | mex-3 (zu155) mutant, pal-1 RNAi, id 186        |
