# Supplementary material
Source: PubMed Central journal article supplement (PMC2688445)

# Supplemental Data File 4:

## Genes Regulated by Caloric Restriction Have Unique Roles within Transcriptional Networks

*William R. Swindell*

*University of Michigan, Departments of Pathology and Geriatrics*

----- .

This file shows plots of the local connectivity index for CR-regulated genes with respect to each of four independent datasets (Tissue, Developmental, Treatment and Mutation Series). The local connectivity index is directly related to the density of the local region immediately surrounding a given gene within the transcriptional network. Green symbols correspond to genes downregulated by CR, while red symbols correspond to genes upregulated by CR. The dashed green line represents the average local connectivity index among the  $n = 12$  CR-downregulated genes, while the dashed red line represents the average local connectivity index among the  $n = 16$  CR-upregulated genes. Dashed black lines were generated by sampling  $n$  transcripts at random and calculating the average local connectivity index within each sample. Among 10,000 simulations, 95% of trials yielded an average local connectivity index within the range indicated by the dashed black lines (see Figure 3).

----- .

Contact: William R. Swindell, [wswindel@umich.edu](mailto:wswindel@umich.edu)

# Tissue Series

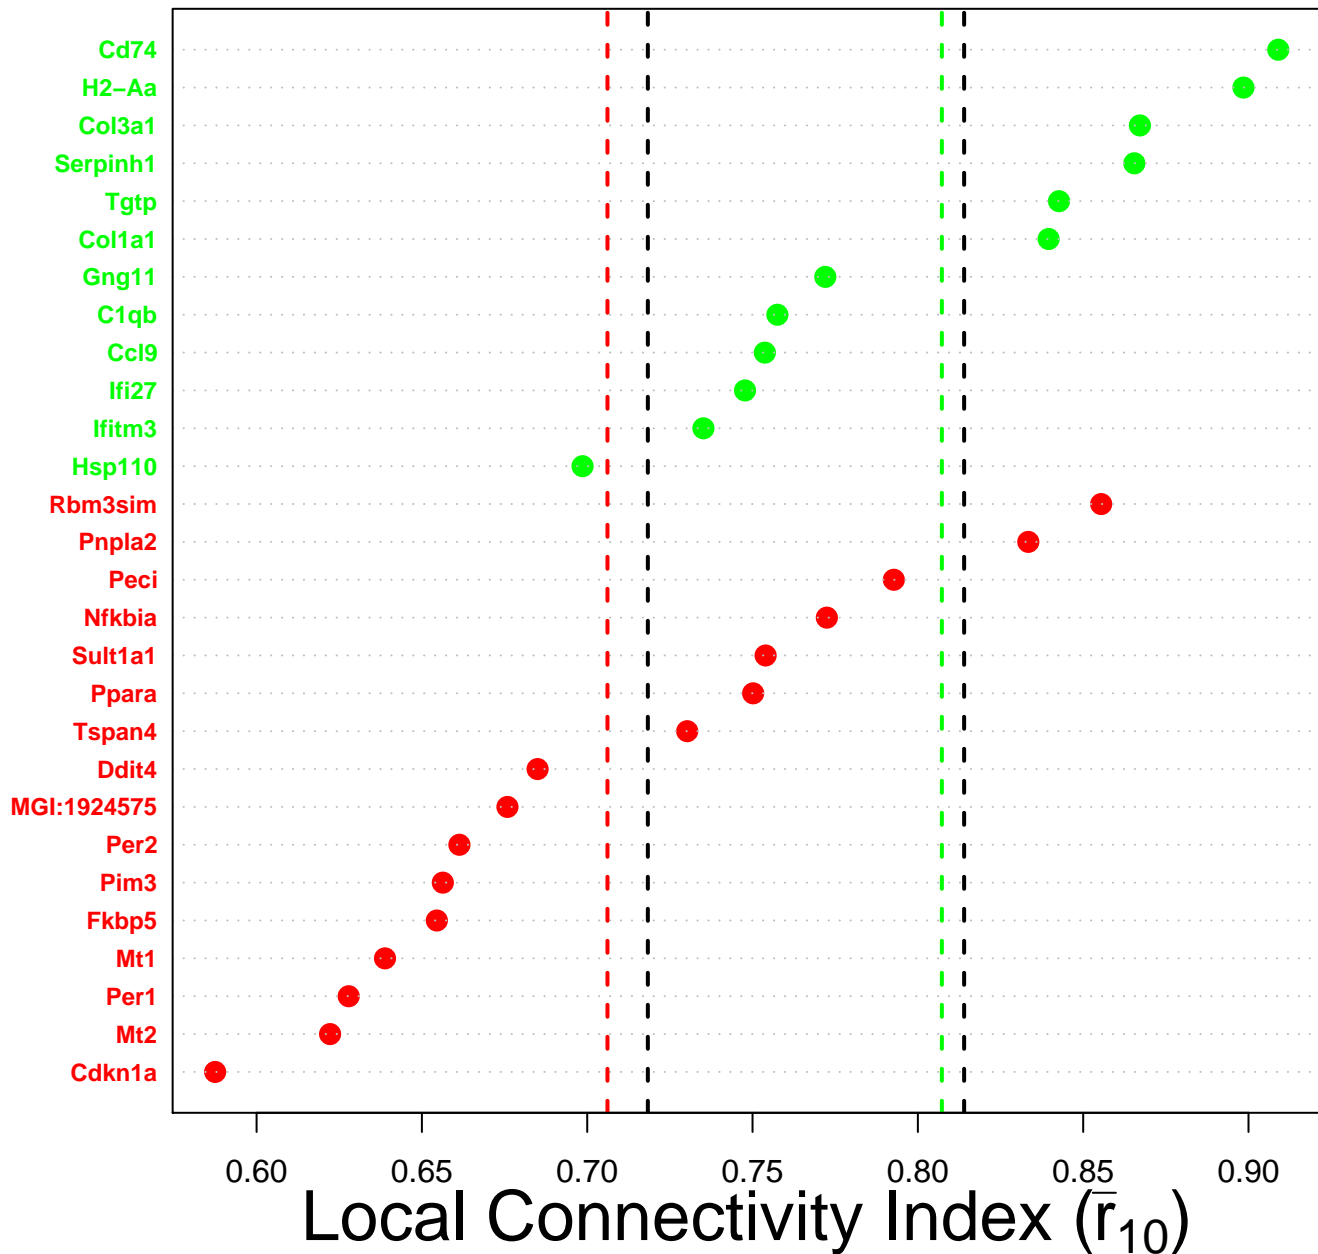

# Developmental Series

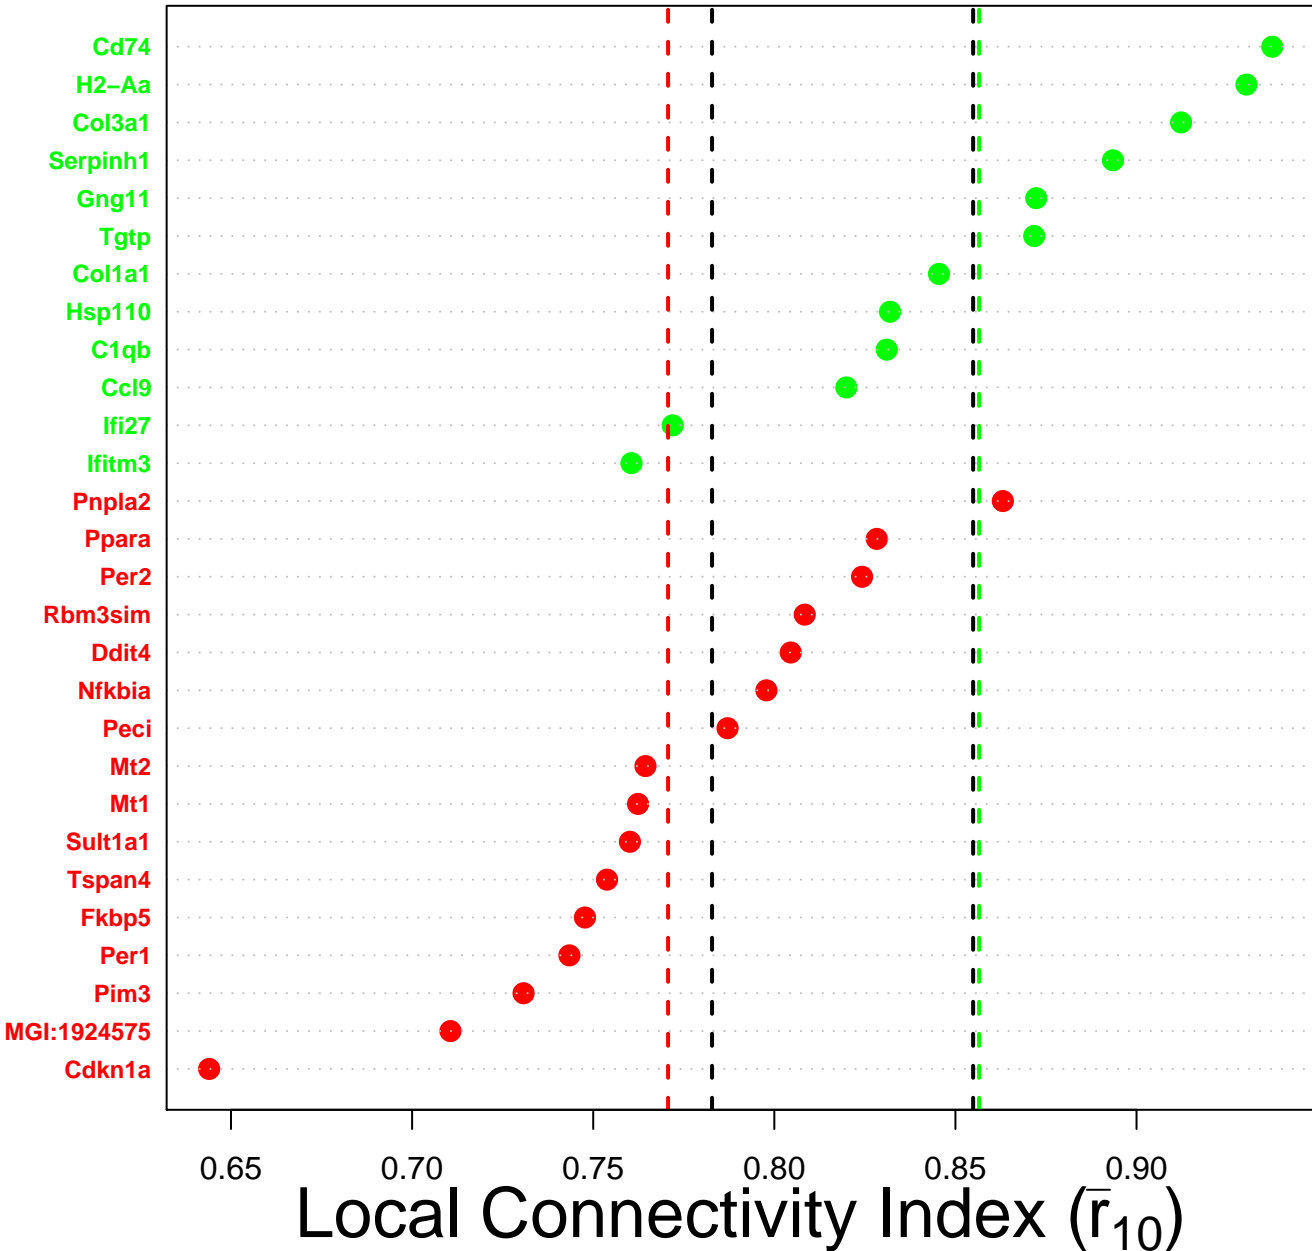

# Treatment Series

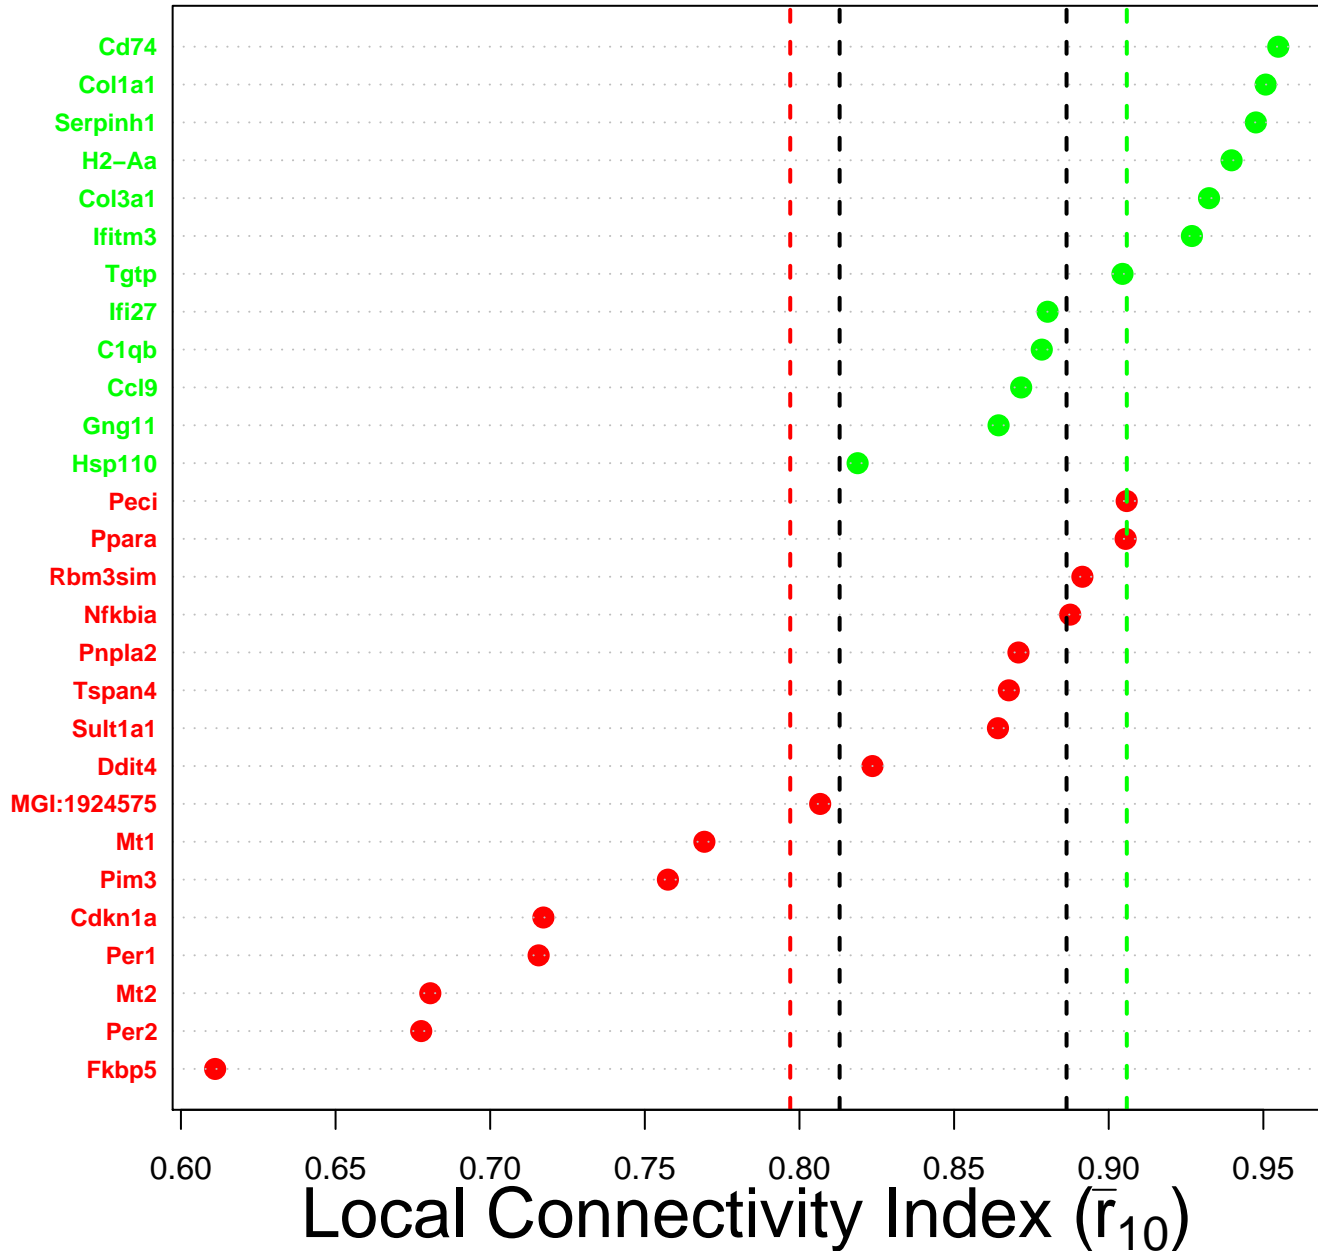

# Mutation Series

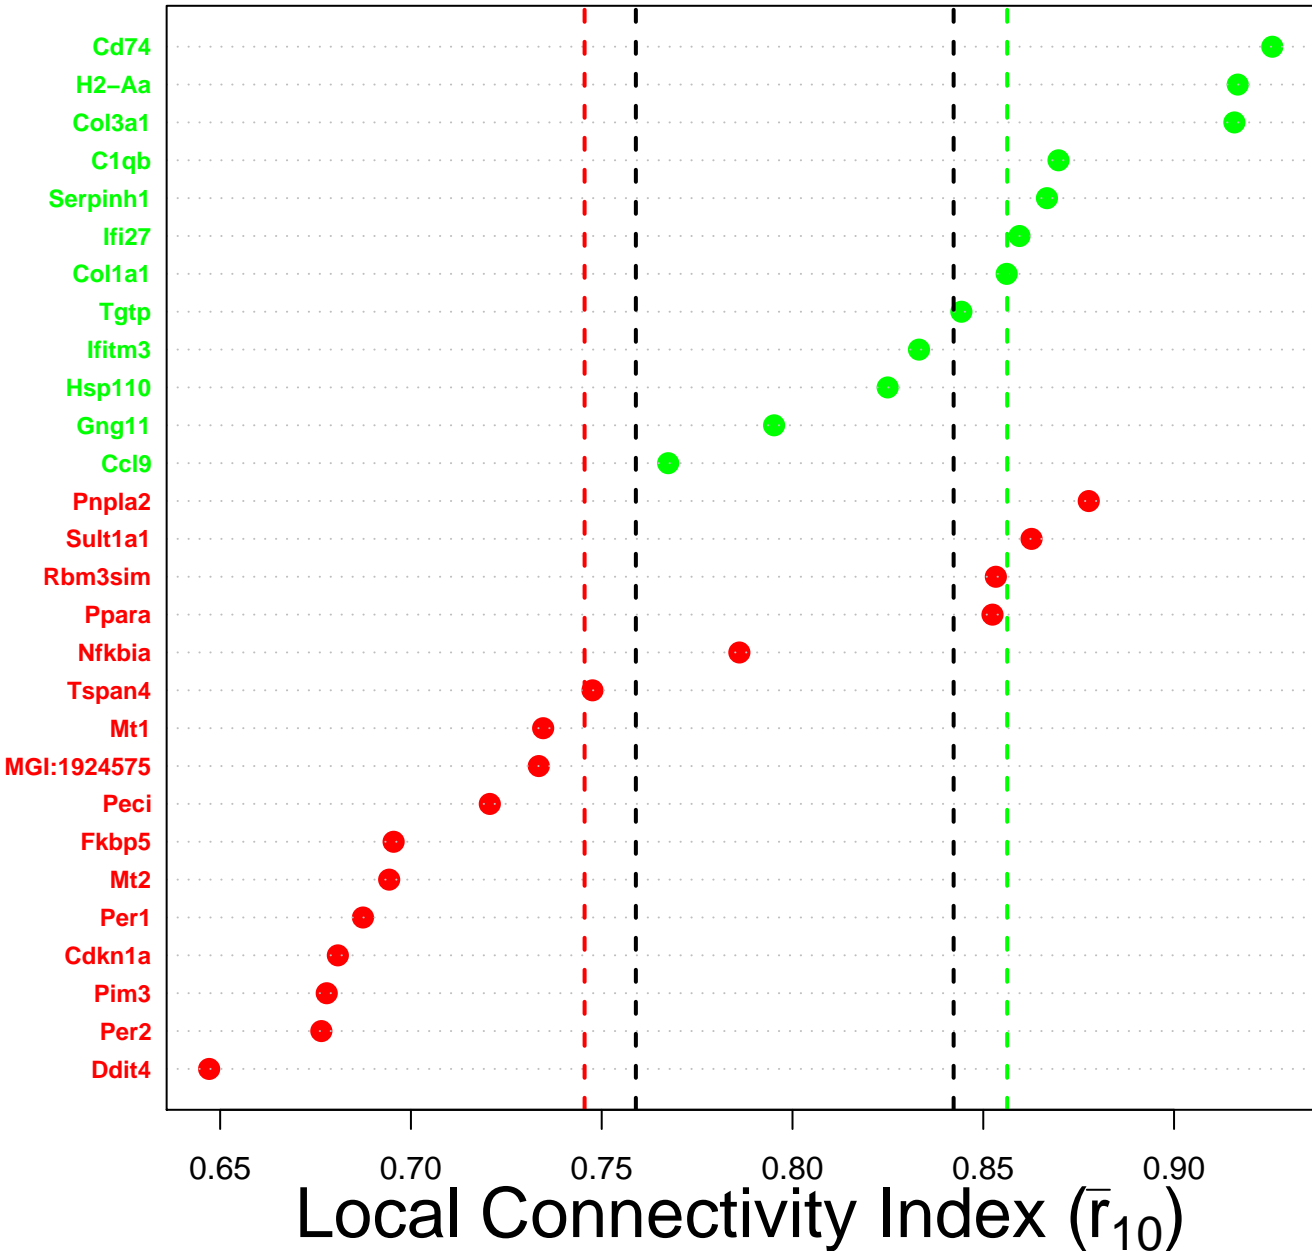

Supplement: NIHMS110370-supplement-4.pdf [file NIHMS110370-supplement-4.pdf]
