# Supplementary material
Source: PubMed Central journal article supplement (PMC2688445)
Supplement: NIHMS110370-supplement-8.pdf [file NIHMS110370-supplement-8.pdf]

# Supplemental Data File 8:

## Genes Regulated by Caloric Restriction Have Unique Roles within Transcriptional Networks

*William R. Swindell*

*University of Michigan, Departments of Pathology and Geriatrics*

-----

This file provides analyses of 16 genes for which mutations have been found to increase mouse lifespan (Prop1, Pit1, Ghr, Ghrhr, Irs2, PappA, Shc1, Igf1r, Kl, Adcy5, Surf1, Insr, Clk1, Ucp2, Irs1, Gpx4). Section I examines the local connectivity properties of these 16 genes (pgs 2–6), while section II examines non–local connectivity properties of the 16 genes (pgs 7–11). The variability among genes in terms of local connectivity is analyzed in section III (pgs 12–13). Section IV characterizes the expression module in which each of the 16 genes is embedded by identifying neighbors of each gene within the genome–wide transcriptional network (pgs 14–25).

-----

Contact: William R. Swindell, [wswindel@umich.edu](mailto:wswindel@umich.edu)

## Section I: Local Connectivity

The next pages provide analyses of the local connectivity properties of the 16 genes for which mutations influence mouse lifespan (compare with Figure 4). The analysis is based on  $n = 31$  transcripts that correspond to these 16 genes of interest, but similar results are obtained using only one transcript per gene of interest. Four graphics are shown, corresponding to the Tissue, Developmental, Treatment, and Mutation series, respectively. In each image, the vertical axis represents the average  $k$ th correlation order statistic (among  $n$  transcripts) and the horizontal axis corresponds to  $k$ . For a given transcript, the  $k$ th correlation order statistic equals the  $k$ th largest correlation between that transcript and all others represented on the Affymetrix Mouse 430 2.0 microarray. Highly connected transcripts should have a larger correlation order statistic for a given value of  $k$ . Blue points represent the average  $k$ th correlation order statistic among the  $n = 31$  transcripts associated with the 16 genes of interest. Dashed black lines outline a 95% confidence region for the average  $k$ th correlation order statistic among  $n$  transcripts sampled at random (based upon simulation). In 95% of 10,000 simulation trials, random samples of  $n$  transcripts from the Affymetrix Mouse 430 2.0 array yielded an average  $k$ th correlation order statistic within the dashed lines.

# Tissue Series

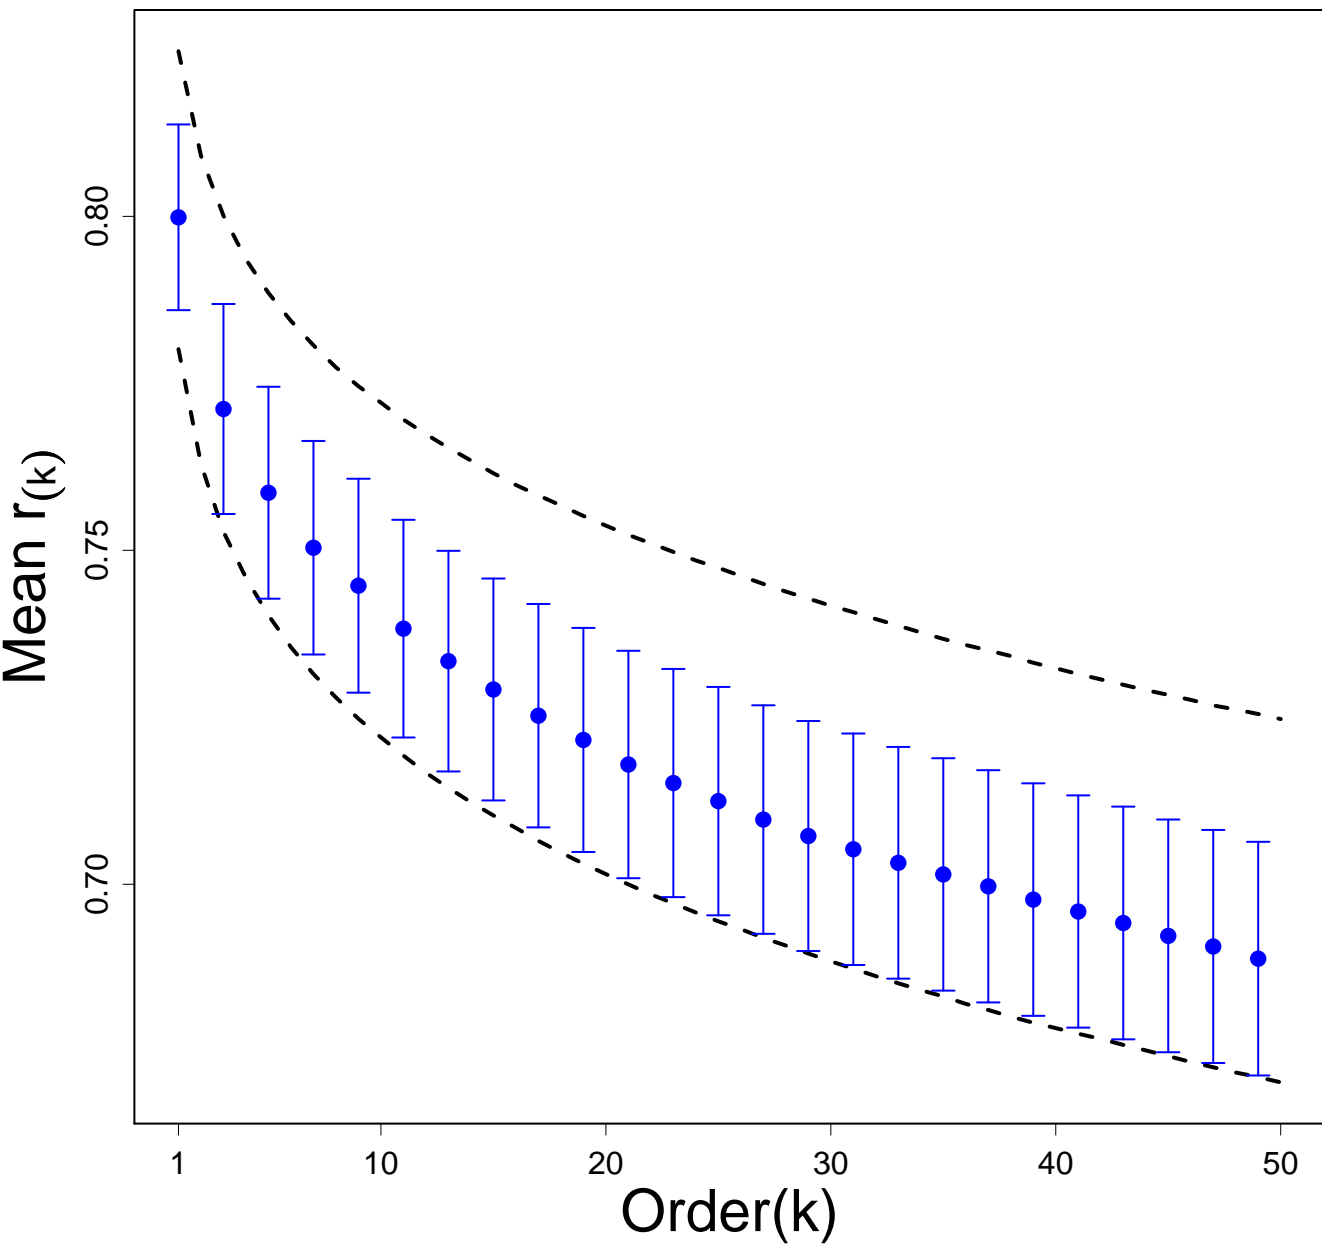

# Developmental Series

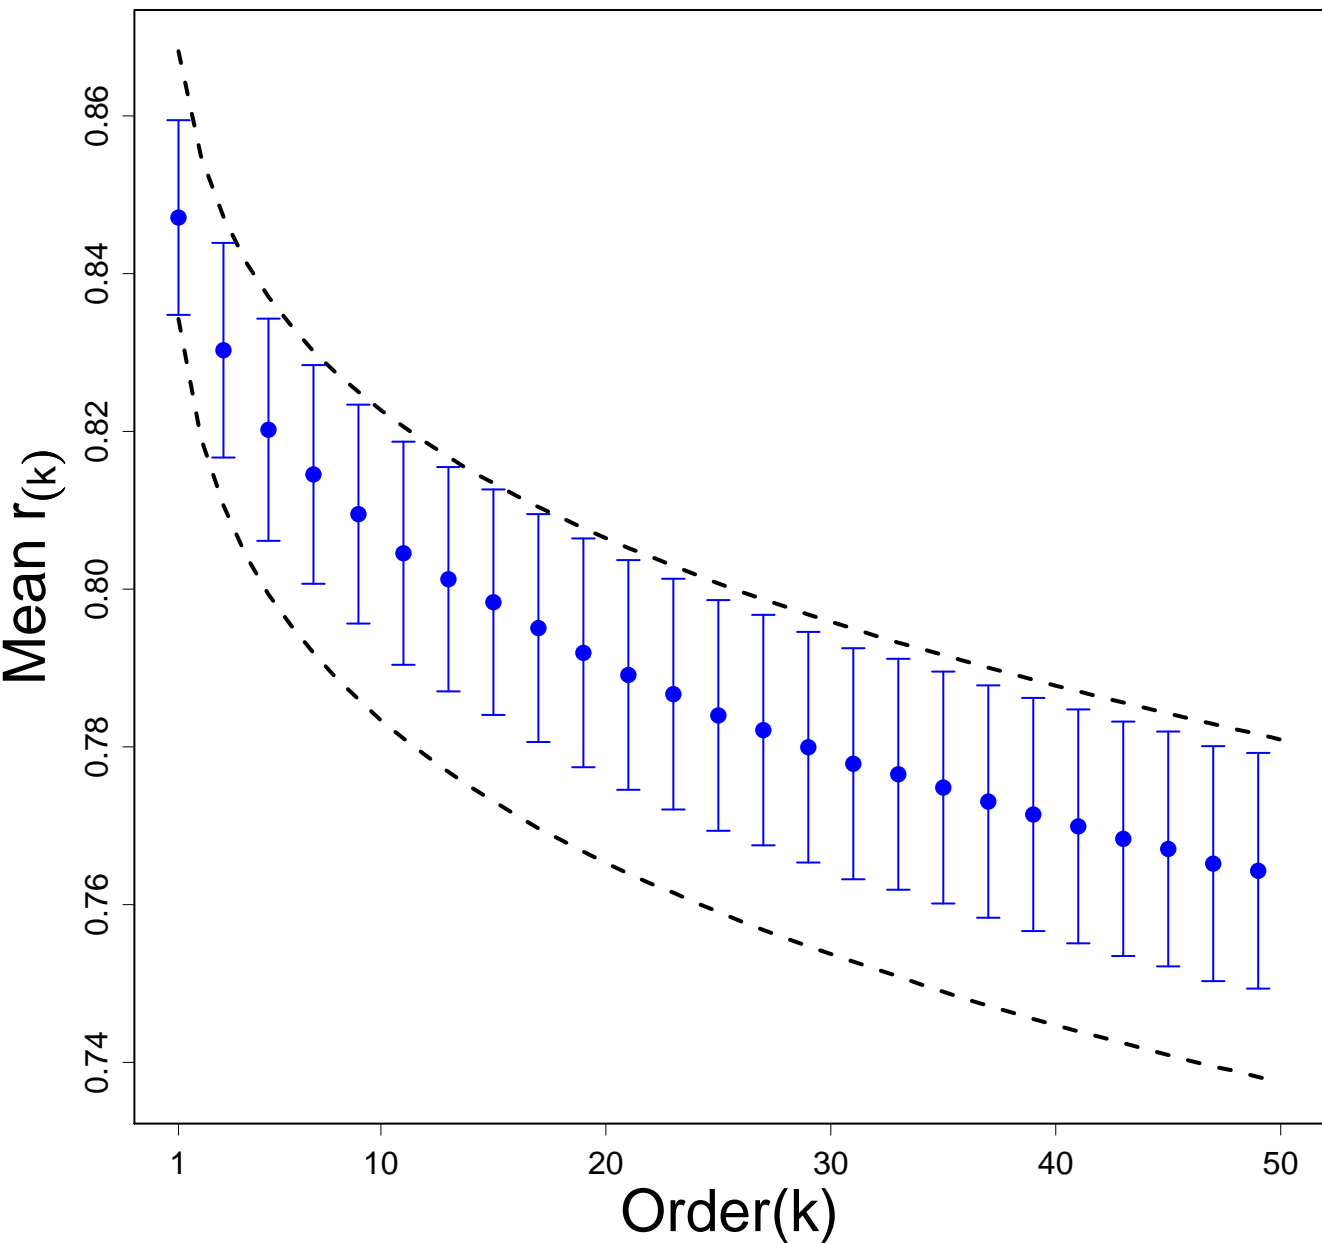

# Treatment Series

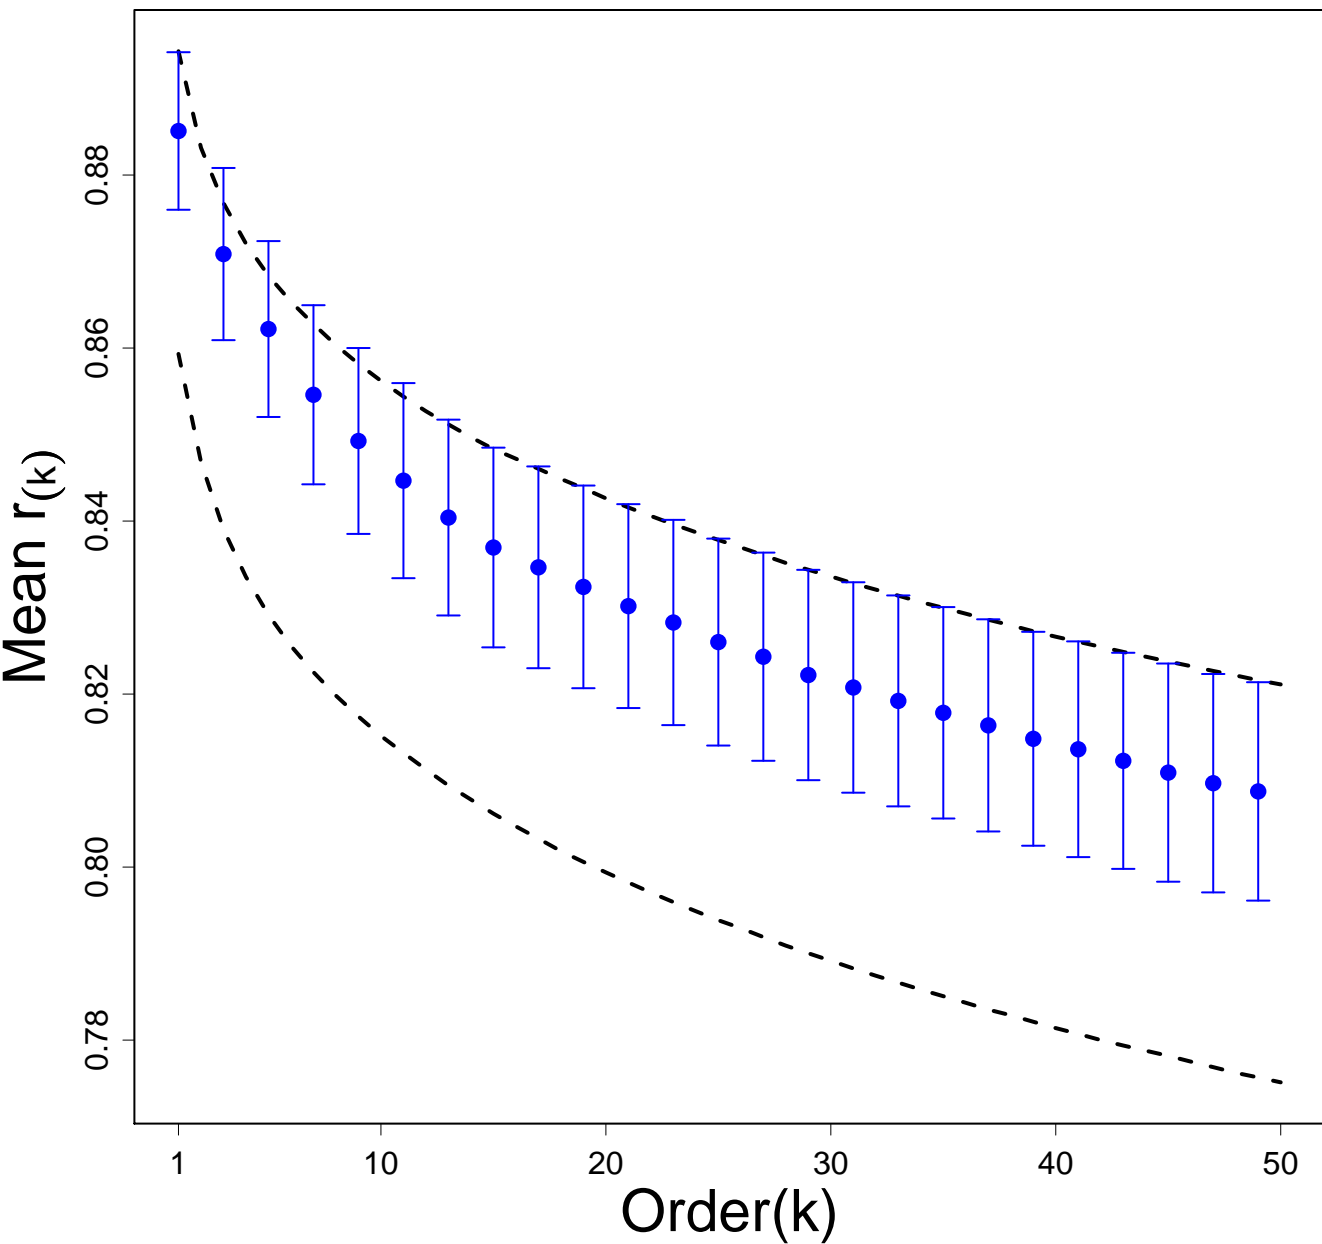

# Mutation Series

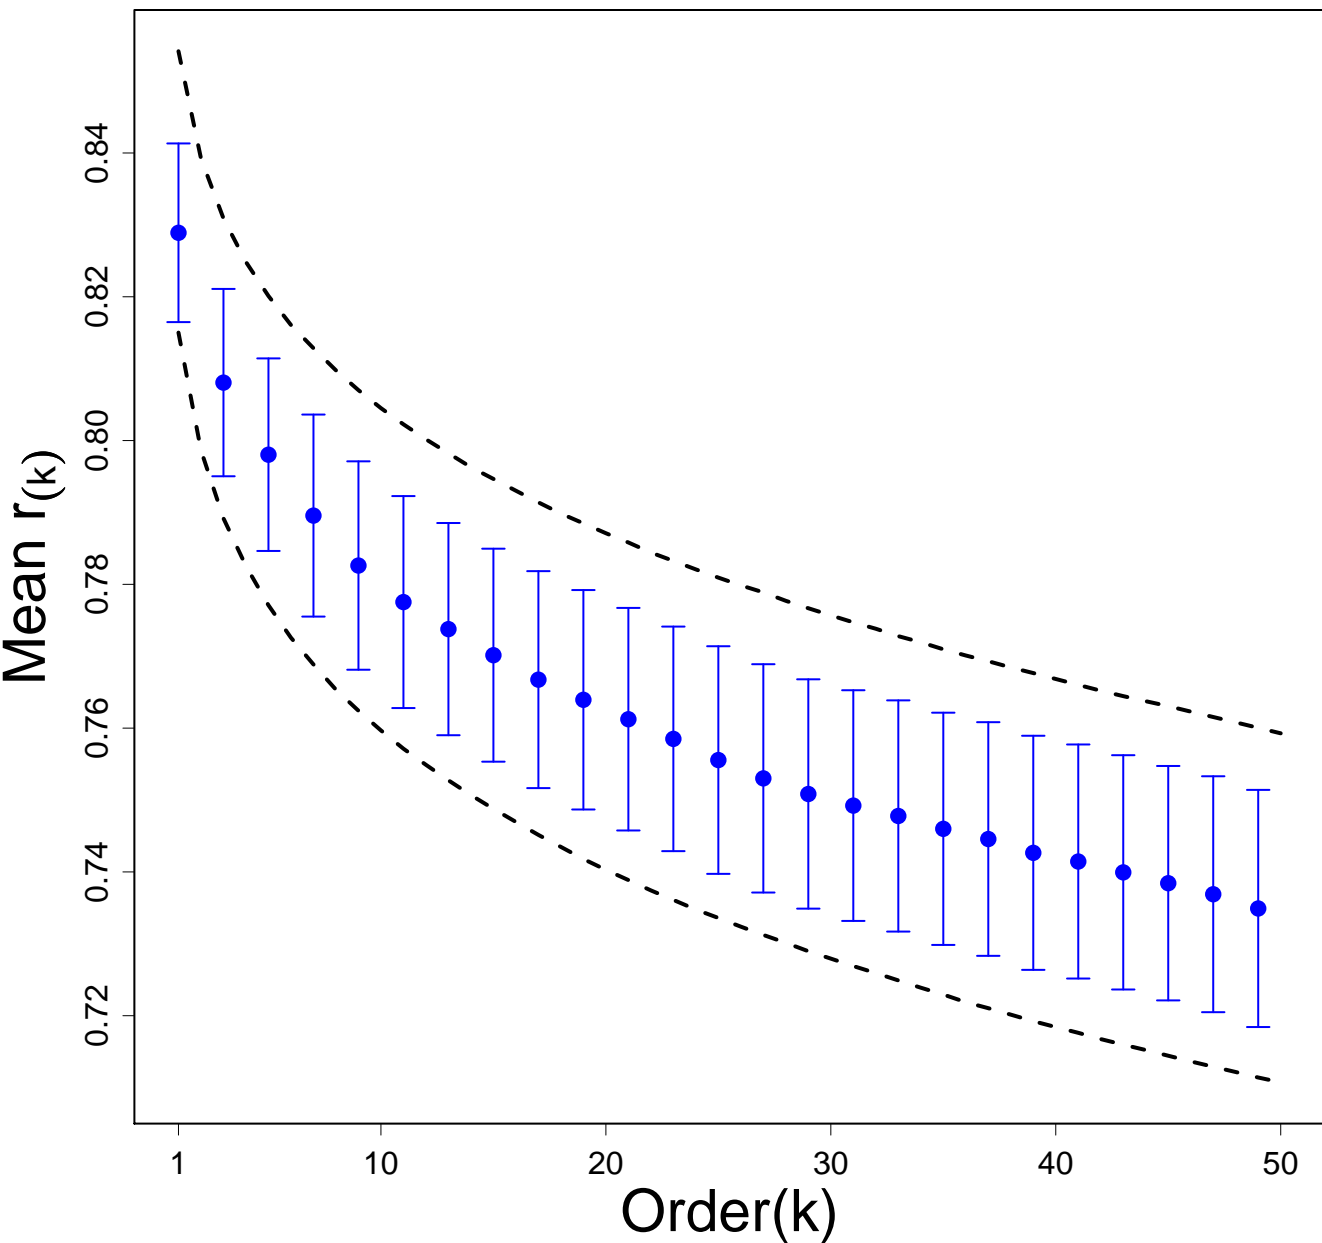

## Section II: Non-local Connectivity

The next pages provide analyses of the non-local connectivity properties of the 16 genes for which mutations influence mouse lifespan (compare with Figure 7). The analysis is based on  $n = 31$  transcripts that correspond to these 16 genes of interest, but similar results are obtained using only one transcript per gene of interest. Four graphics are shown, corresponding to the Tissue, Developmental, Treatment, and Mutation series, respectively. In each image, the vertical axis represents the average pth correlation percentile (among  $n$  transcripts) and the horizontal axis corresponds to  $p$ . For a given transcript, correlations with all other transcripts on the Affymetrix Mouse 430 2.0 array were determined, and the pth correlation percentile is the correlation value that is larger than  $p$  percent of all of these correlations. Transcripts that have strong “distant” connections should have large correlation percentiles. Blue points represent the average pth correlation percentile among the  $n = 31$  transcripts associated with the 16 genes of interest. Dashed black lines outline a 95% confidence region for the average pth correlation percentile among  $n$  transcripts sampled at random (based upon simulation). In 95% of 10,000 simulation trials, random samples of  $n$  genes from the Affymetrix Mouse 430 2.0 array yielded an average pth correlation percentile within the dashed lines.

# Tissue Series

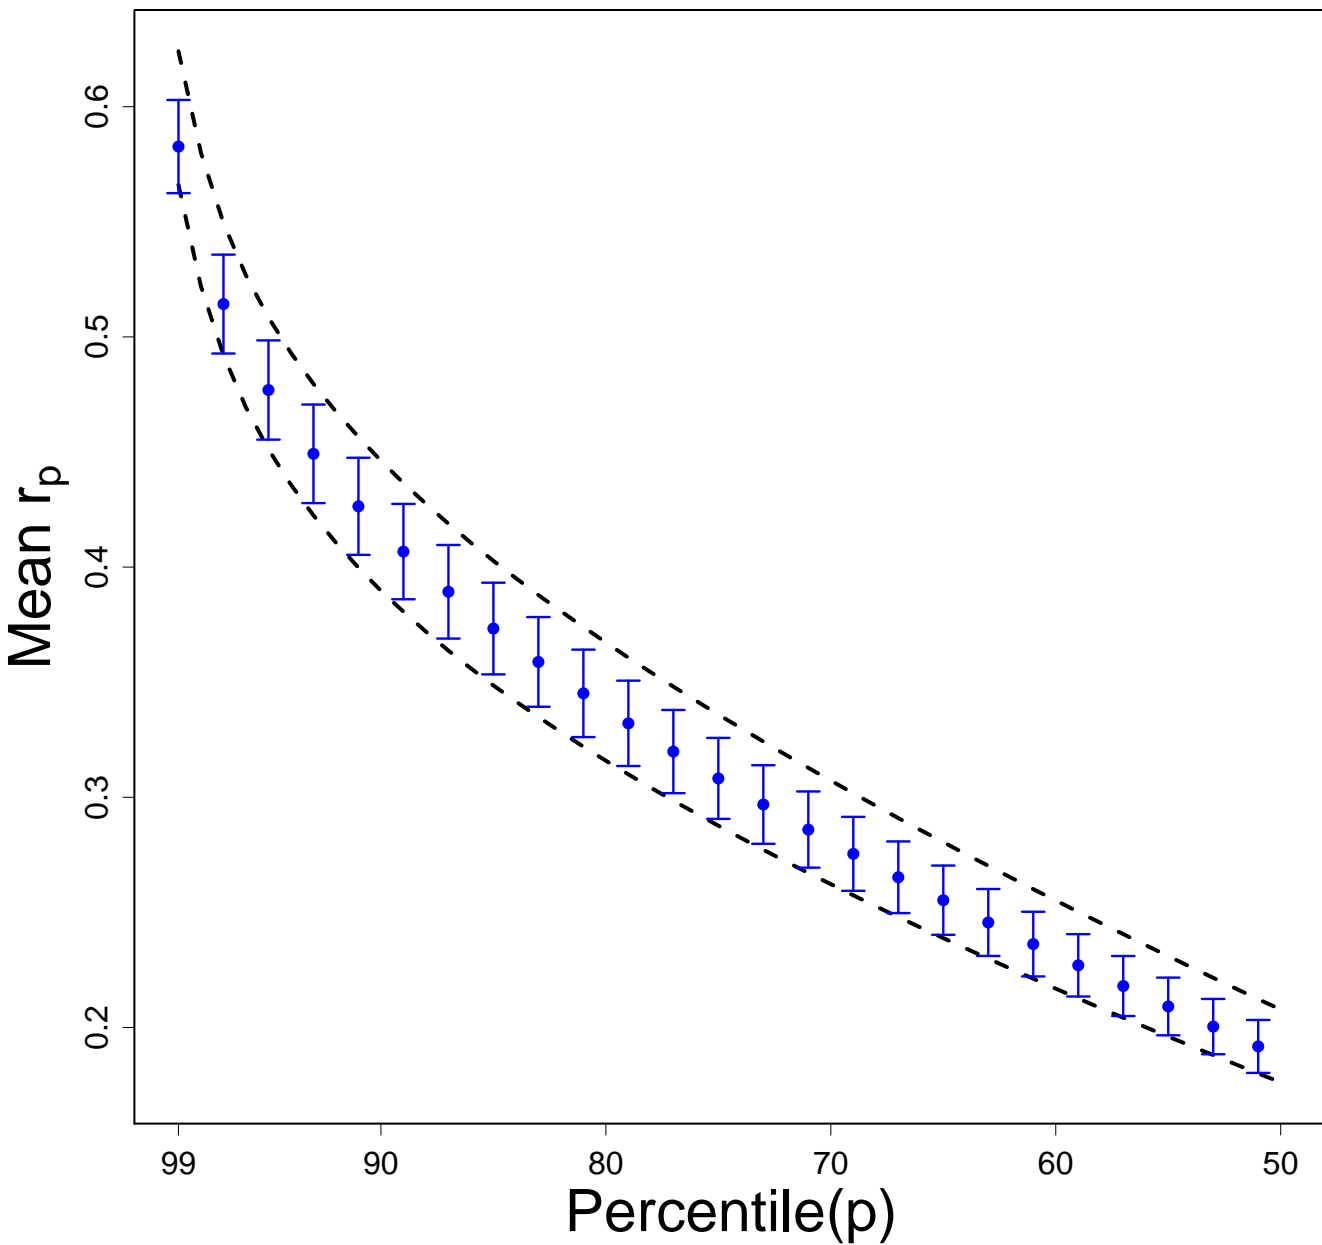



# Developmental Series

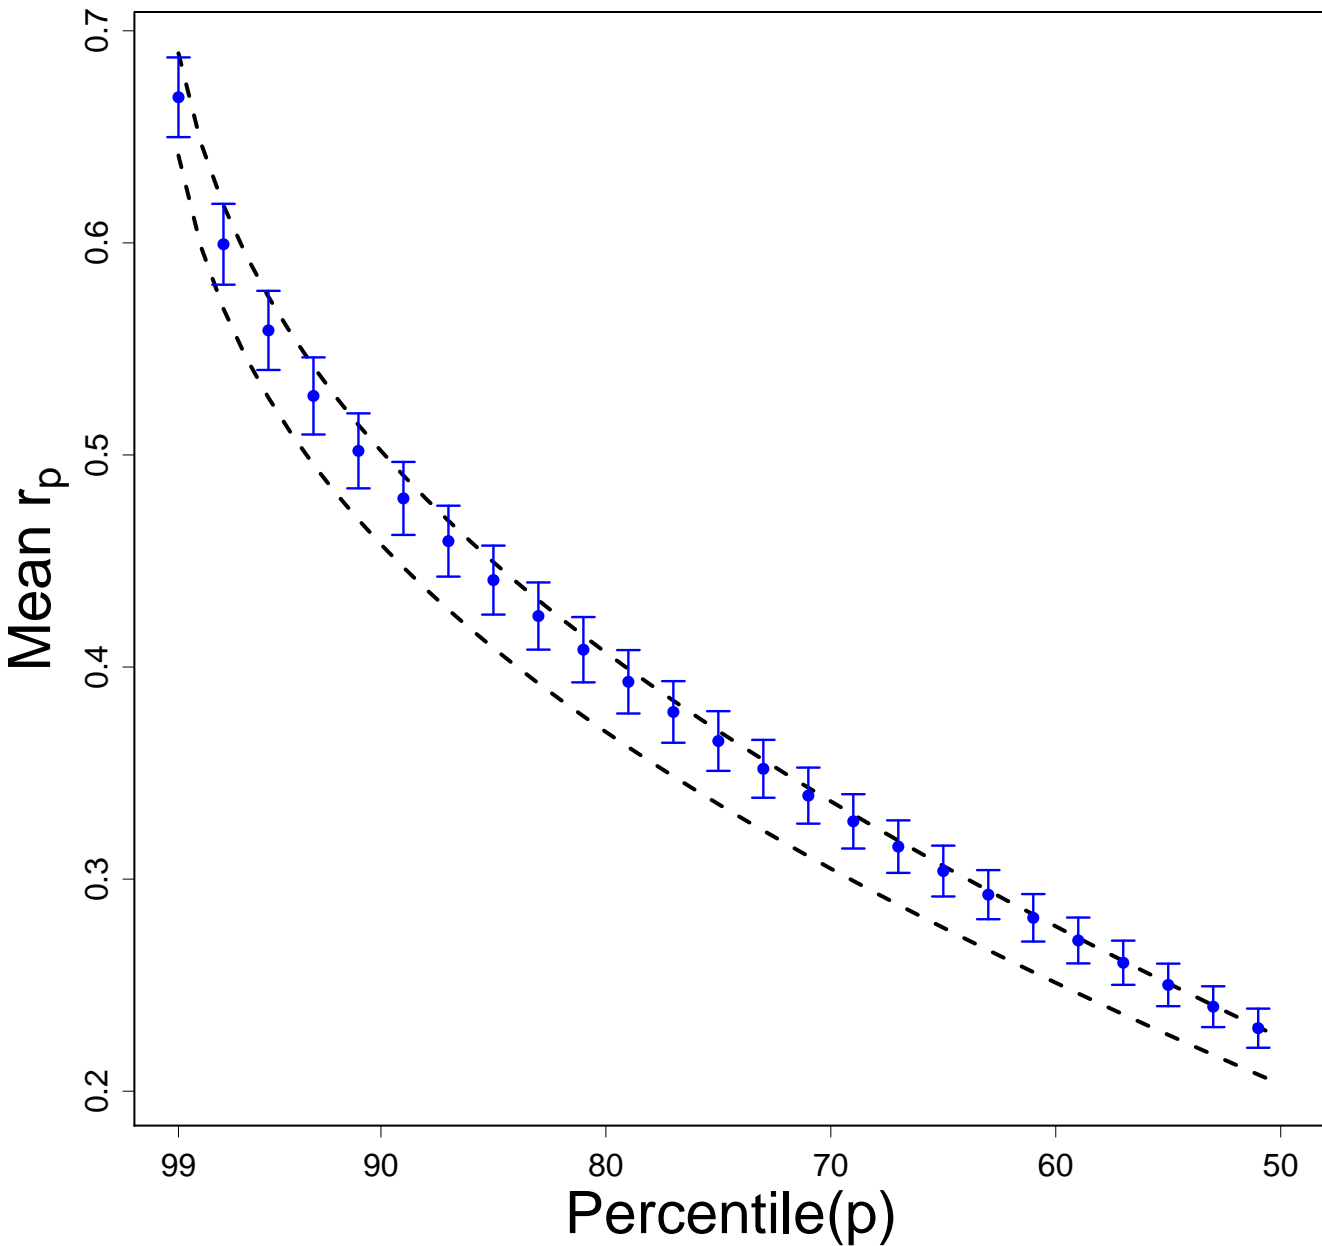

# Treatment Series

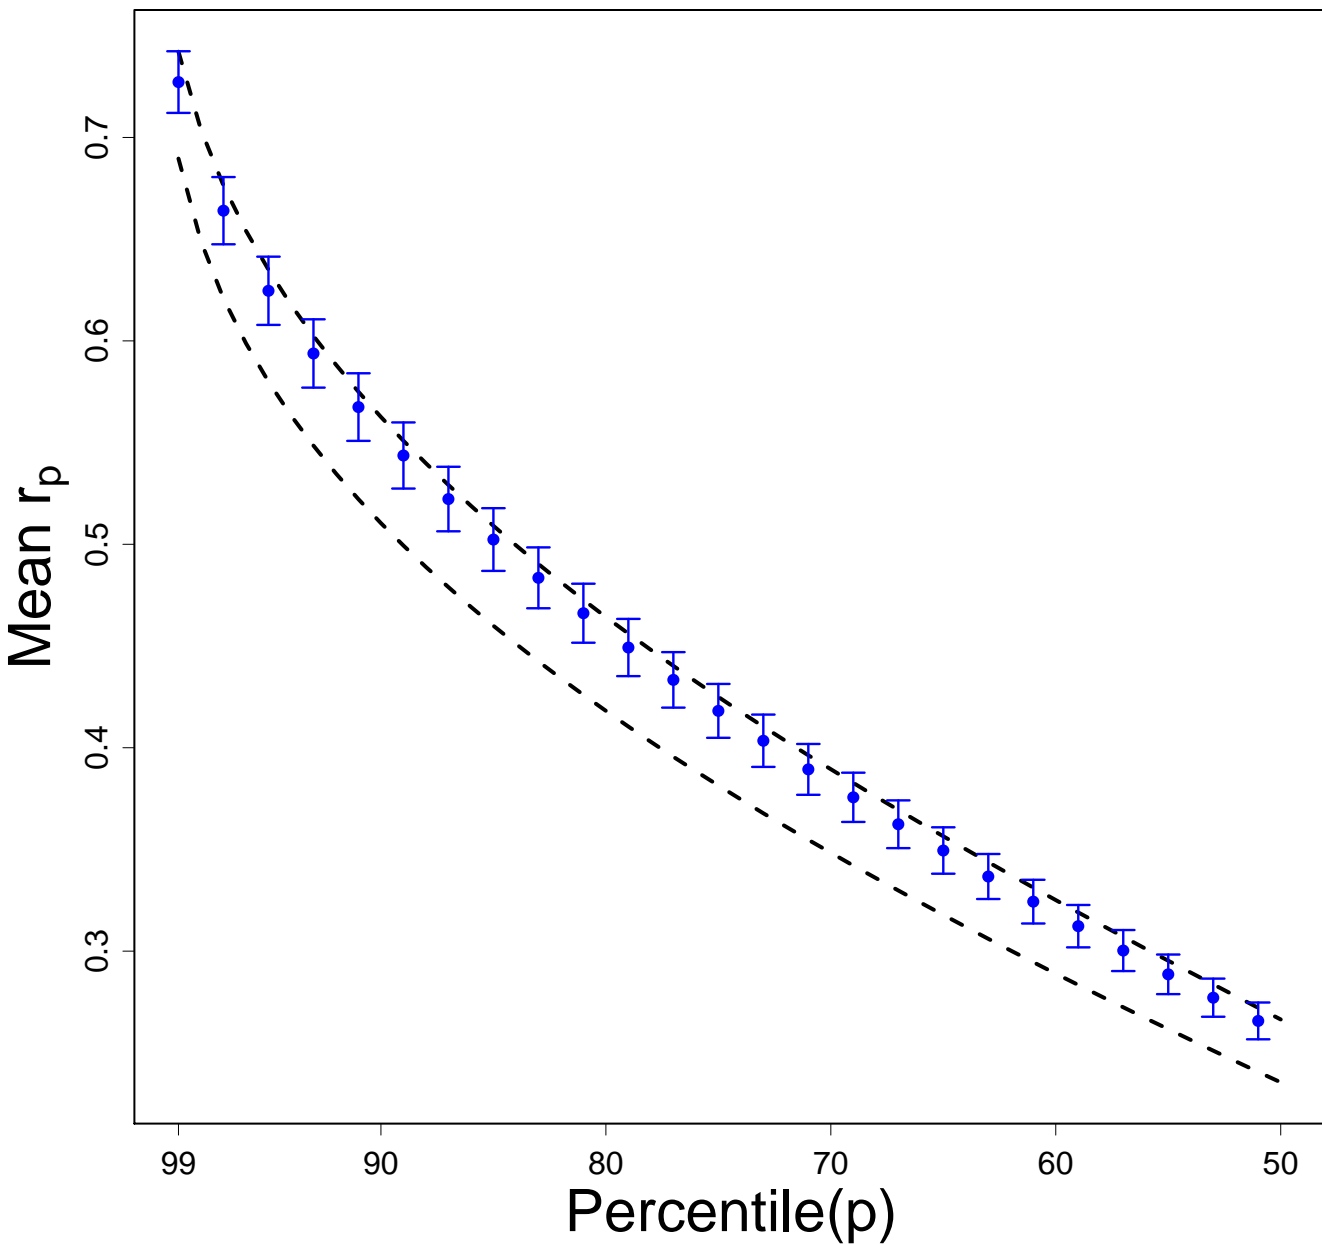

# Mutation Series

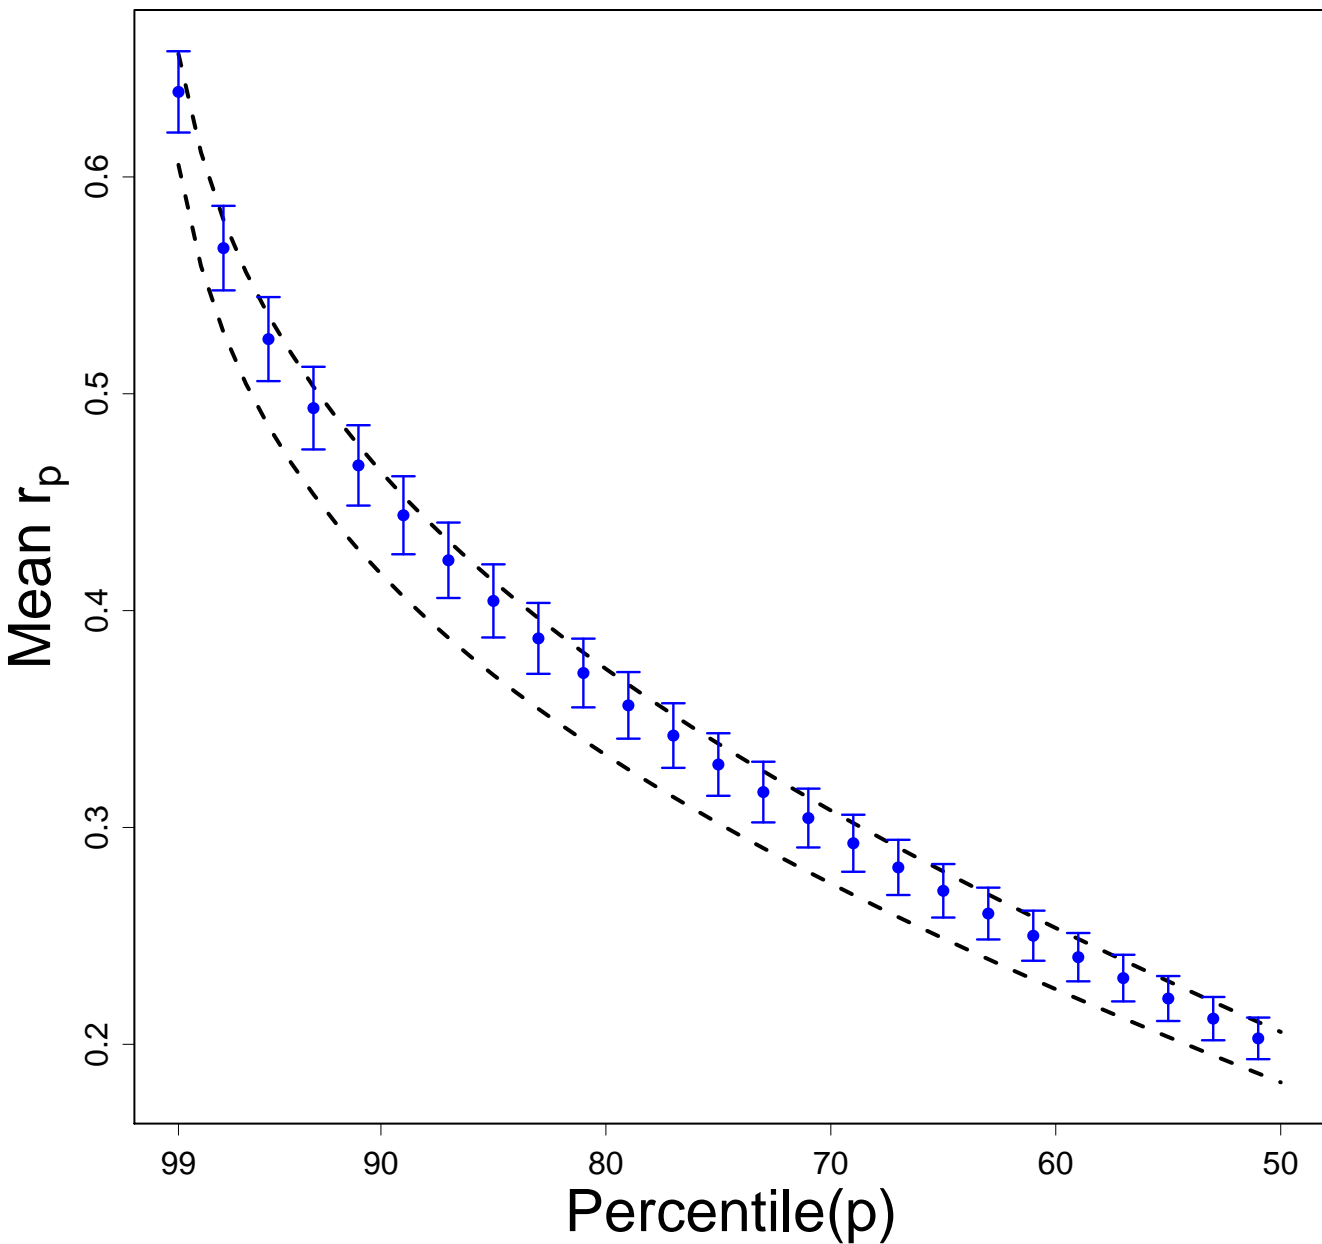

## Section III: Local Connectivity Index

The next pages show plots of the local connectivity index for 16 lifespan-associated genes with respect to each of four independent datasets (Tissue, Developmental, Treatment and Mutation Series). The local connectivity index is directly related to the density of the local region immediately surrounding a given gene within the genome-wide transcriptional network. Based on this metric, each image lists the 16 genes of interest in the order of most to least connected, given the dataset indicated in the upper left hand corner of the figure. For some genes, more than one transcript was represented on the Affymetrix Mouse 430 2.0 array. In such cases, the local connectivity index was first calculated for each transcript individually and then averaged among transcripts corresponding to the same gene symbol.

# Tissue Series

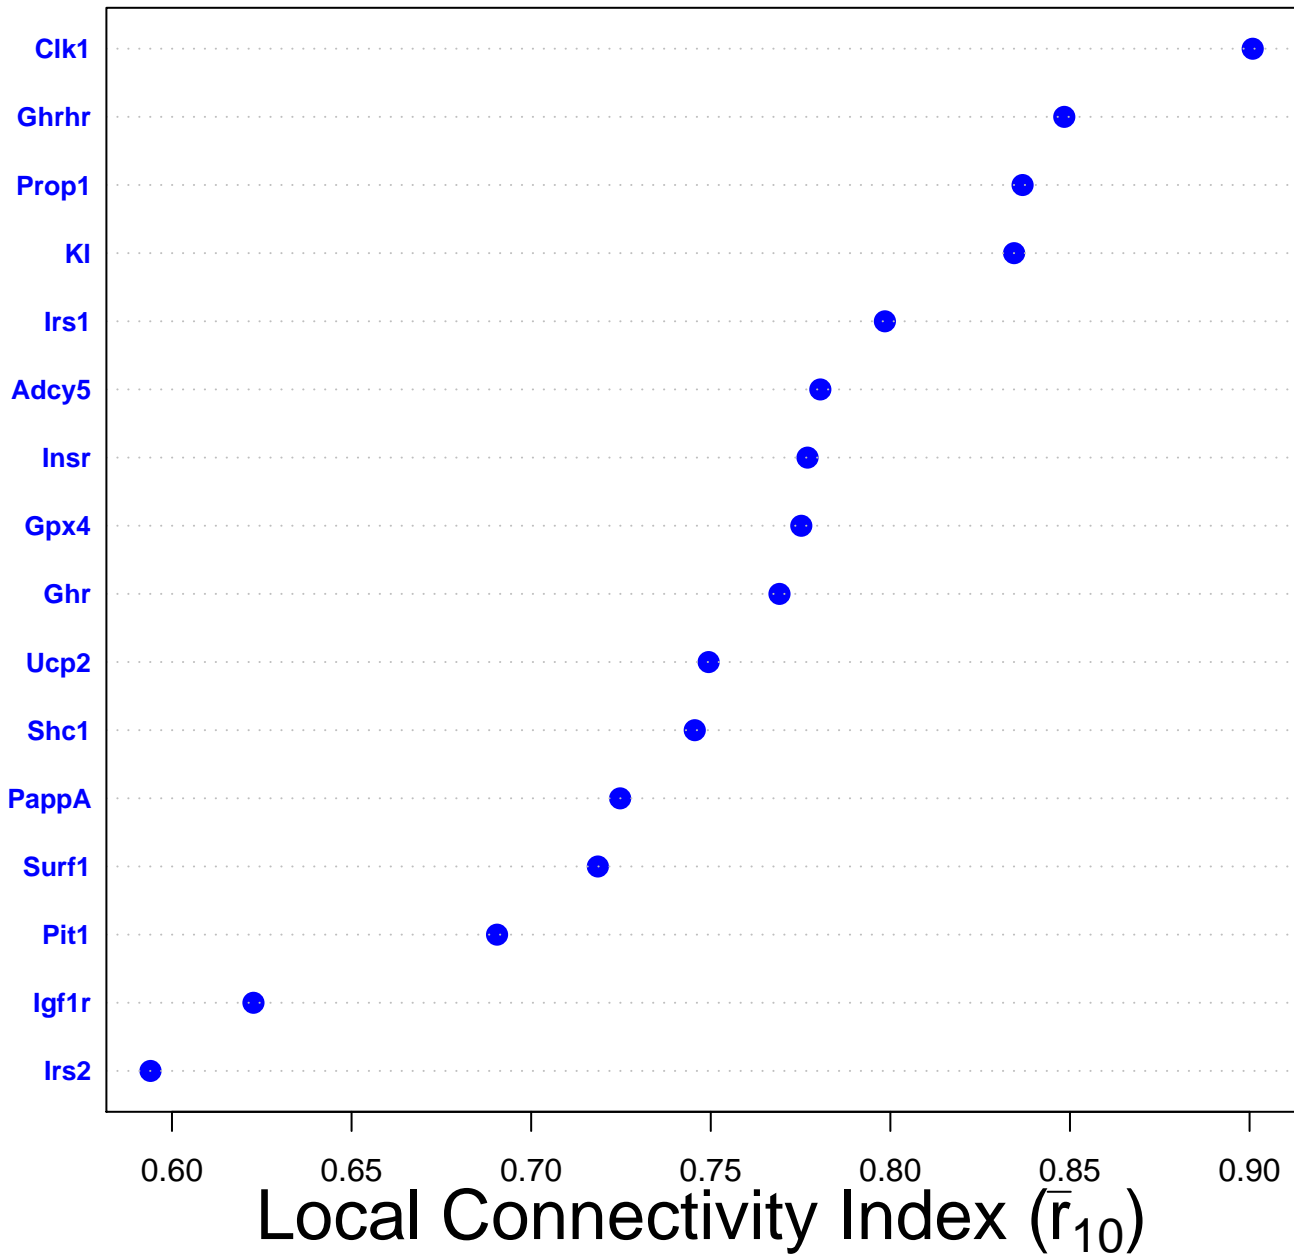

# Developmental Series

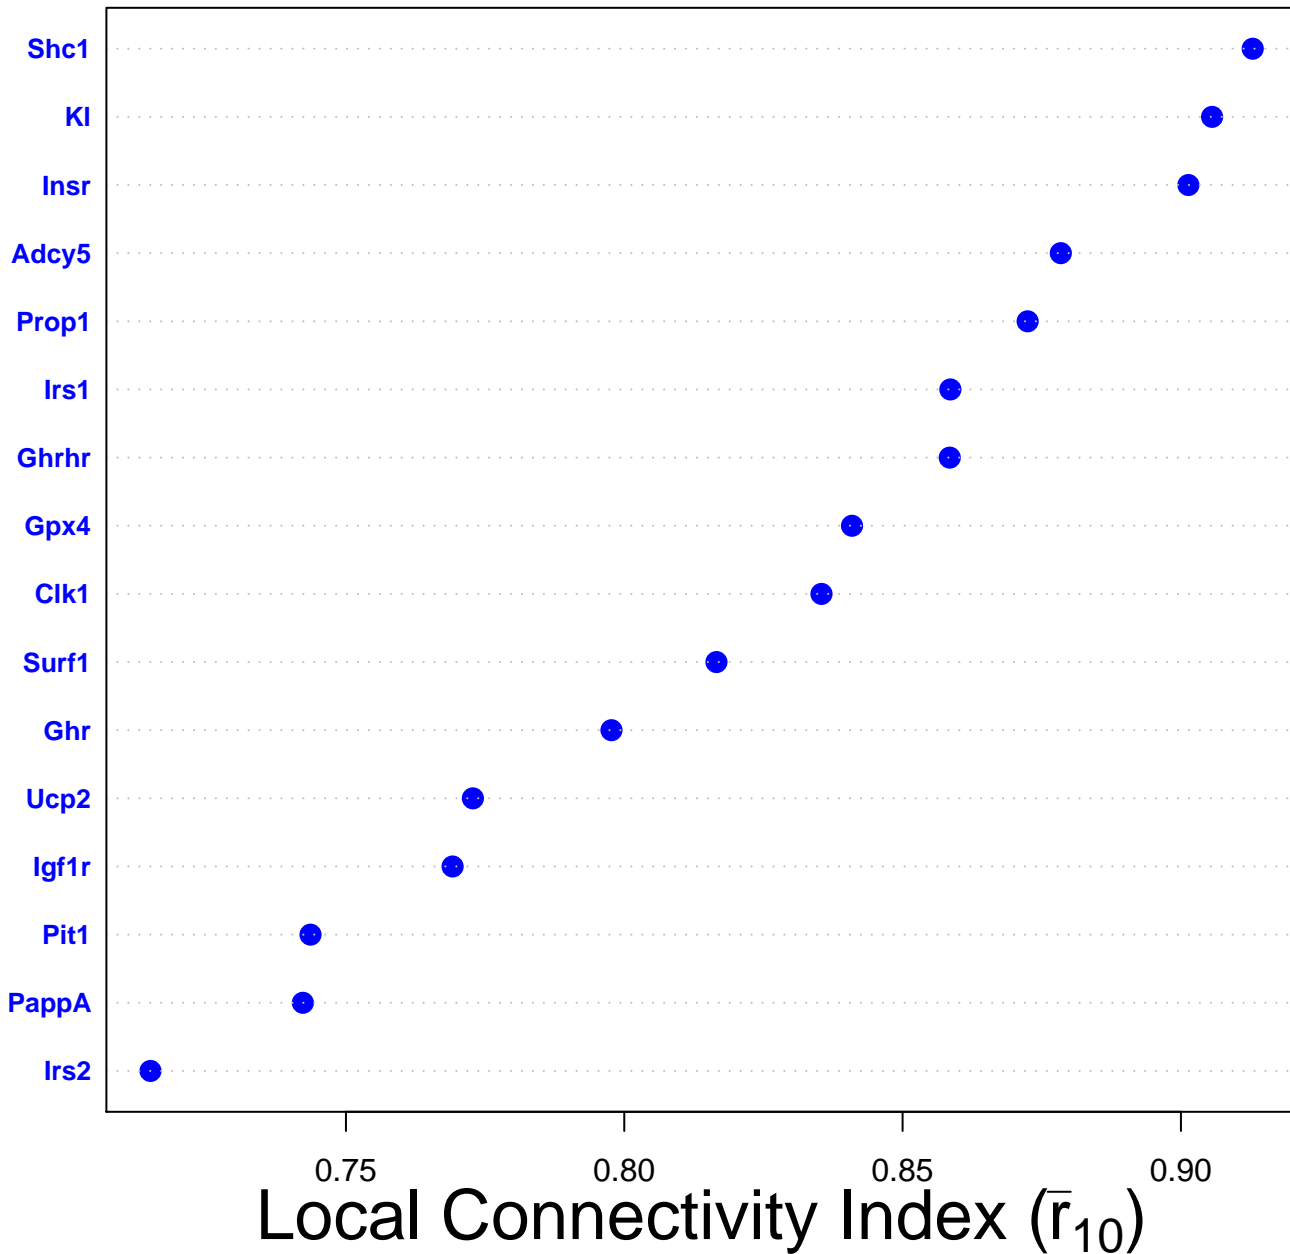

# Treatment Series

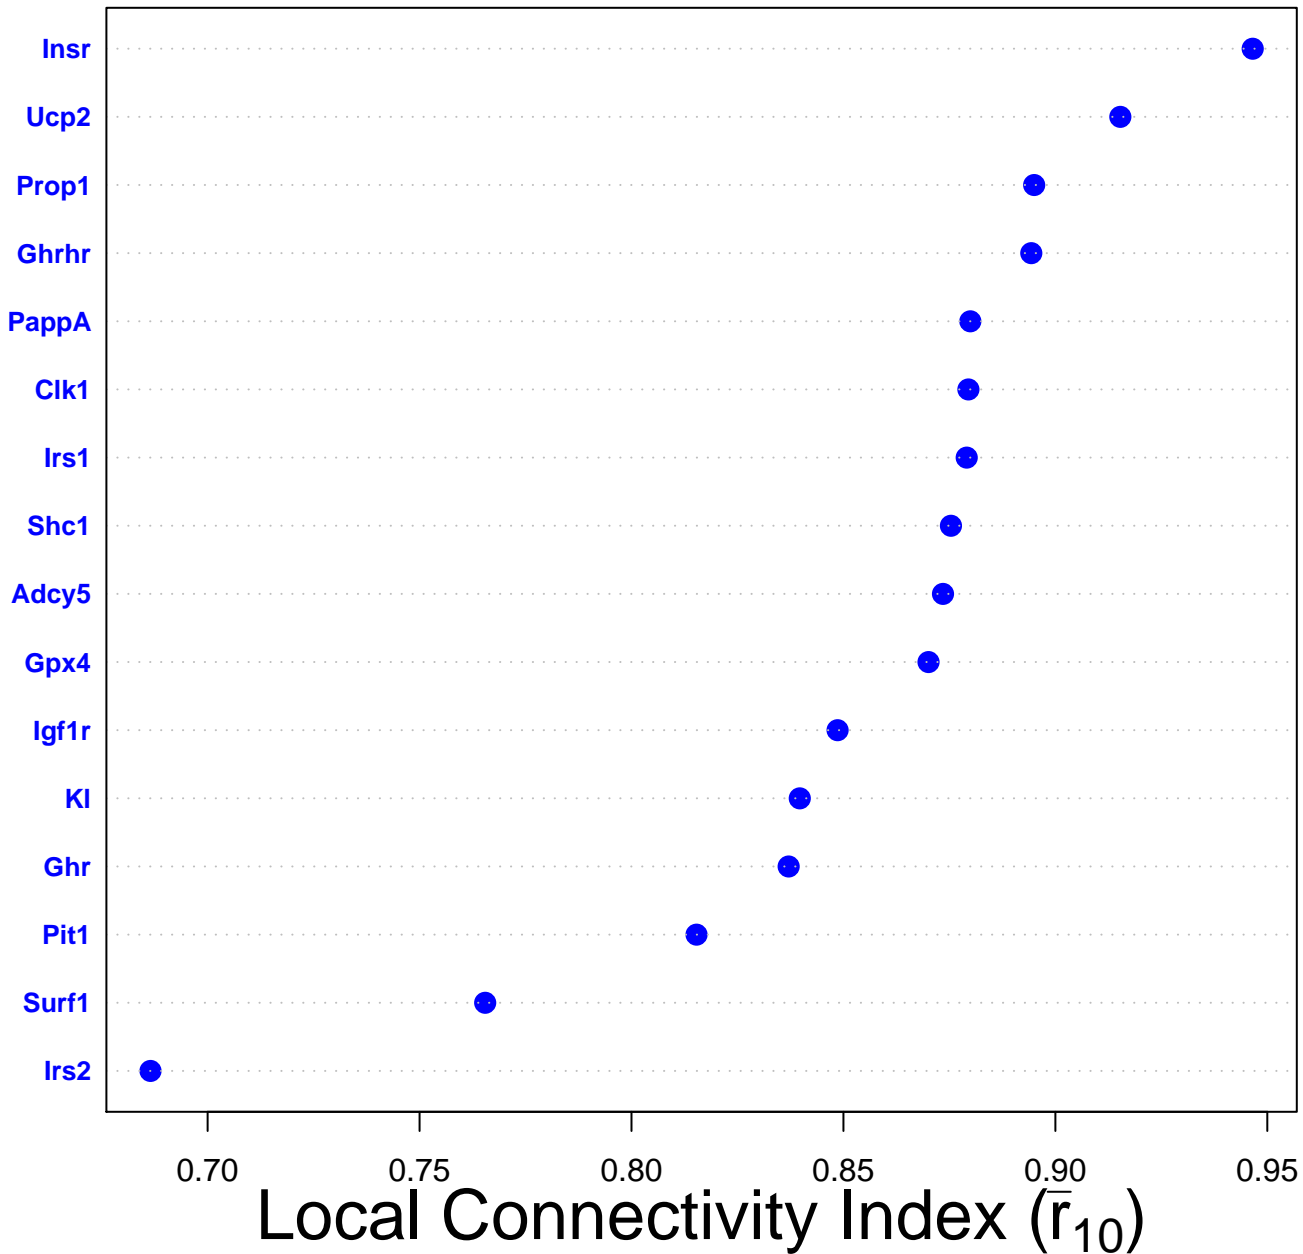

# Mutation Series

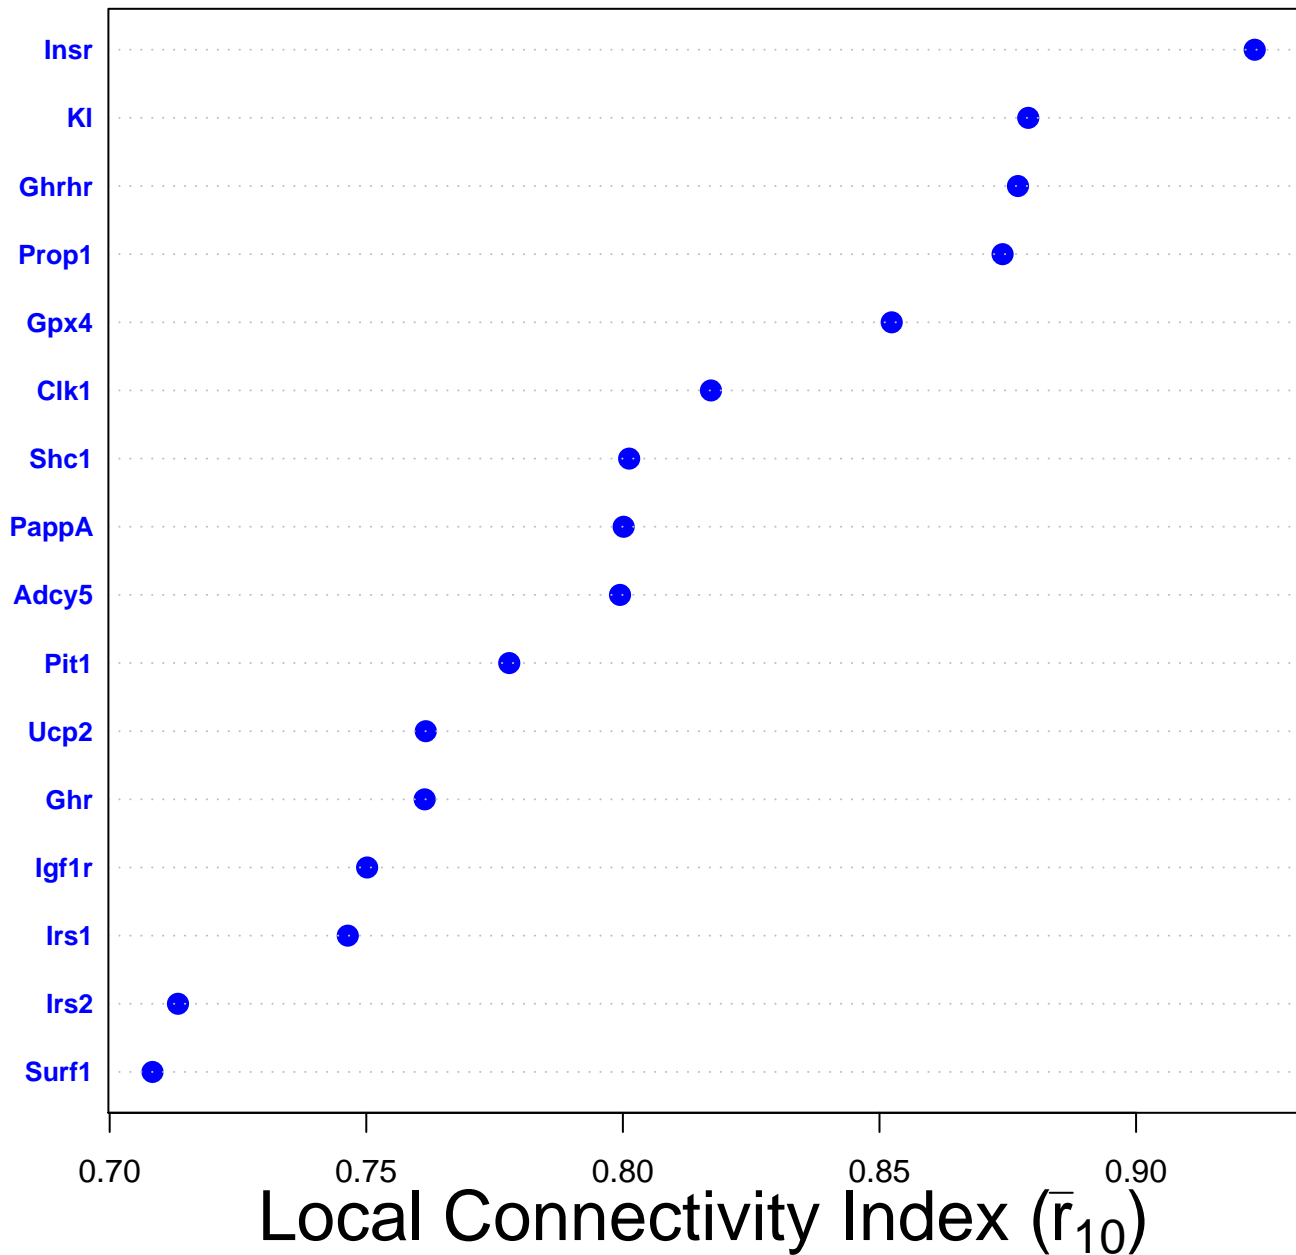



## Section IV: Cluster Analyses

The next pages display dendrograms based on each of 16 lifespan-associated genes and their respective nearest-neighbors in the genome-wide transcriptional network. For each gene, the 25 most similar genes throughout the genome were identified based upon expression patterns from four independent datasets (Tissue, Developmental, Treatment and Mutation Series). Similarity between genes was determined by averaging absolute correlation coefficients across the four datasets. Each lifespan-associated gene was then clustered along with its neighbors to obtain the dendrograms shown in this file. In each image, the lifespan-associated gene upon which the dendrogram is based is shown in the upper-left corner. Throughout all images, the 16 lifespan-associated genes of interest have blue labels.

# Prop1

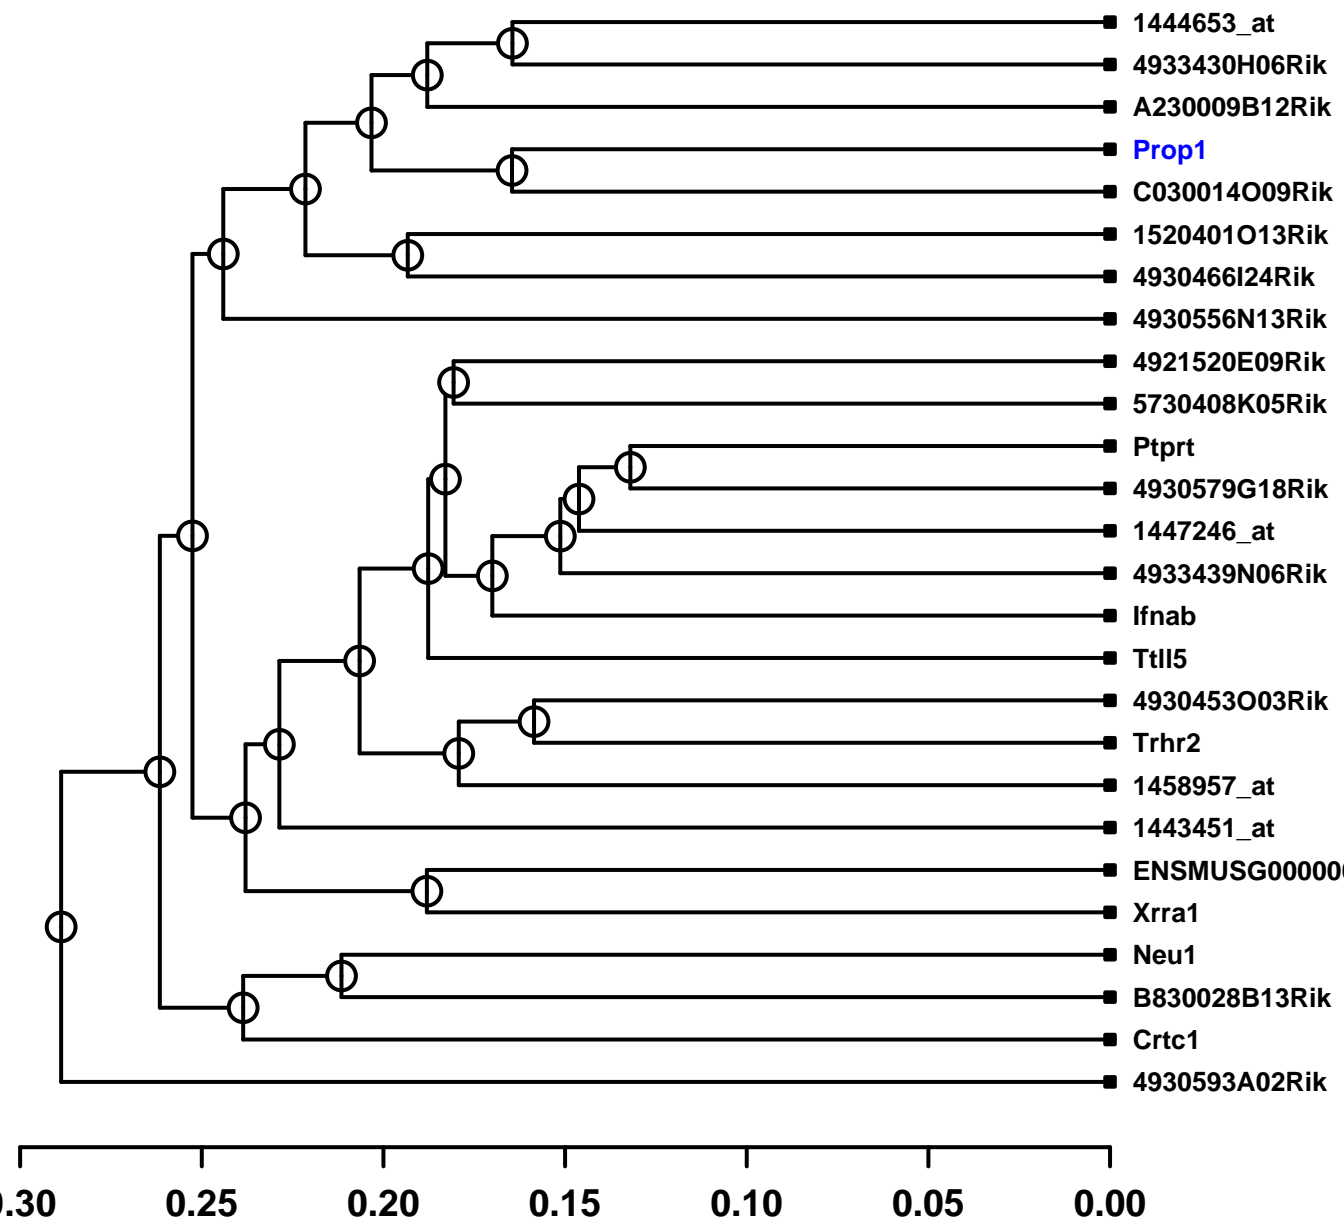

# Pit1

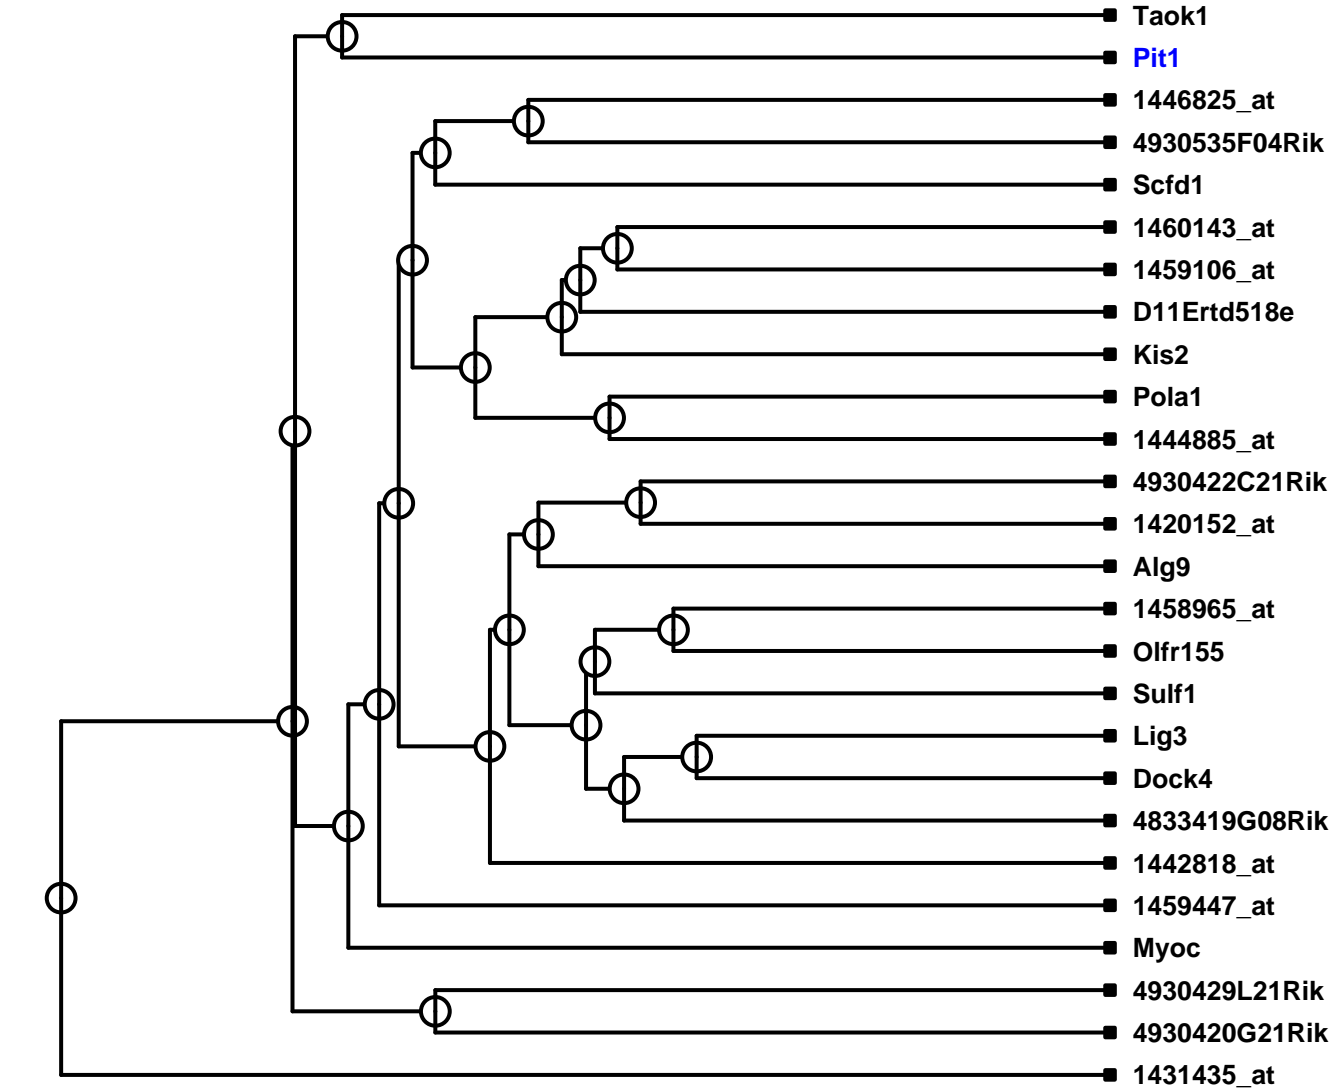

0.5      0.4      0.3      0.2      0.1      0.0

# Ghr

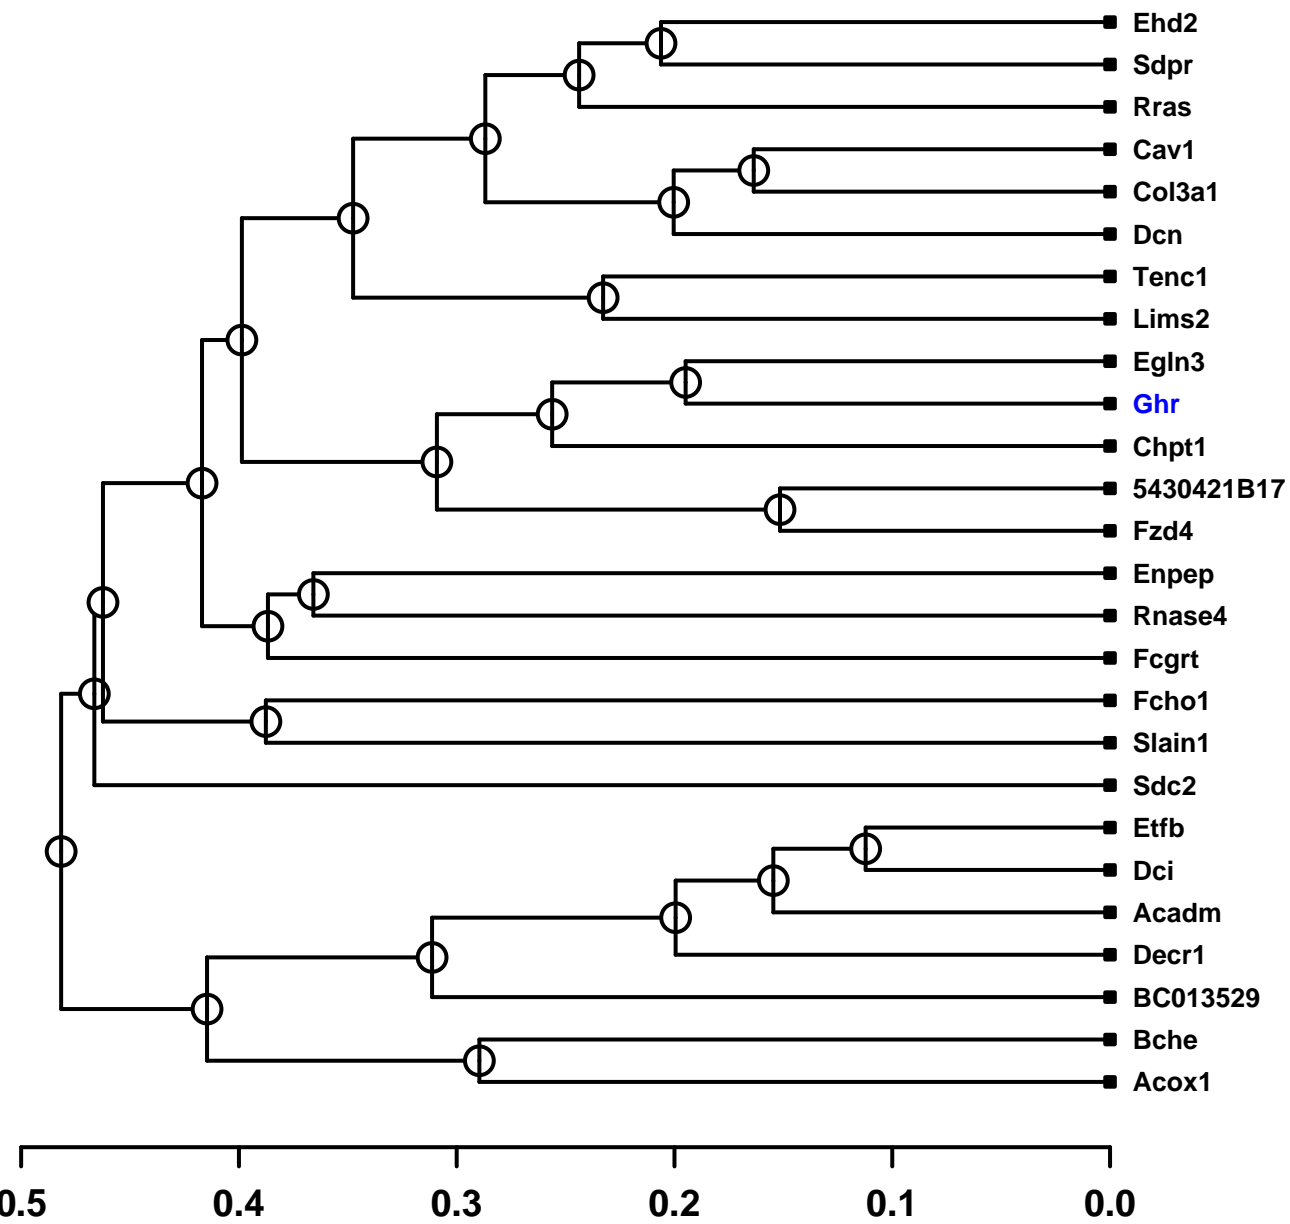

# Ghrhr

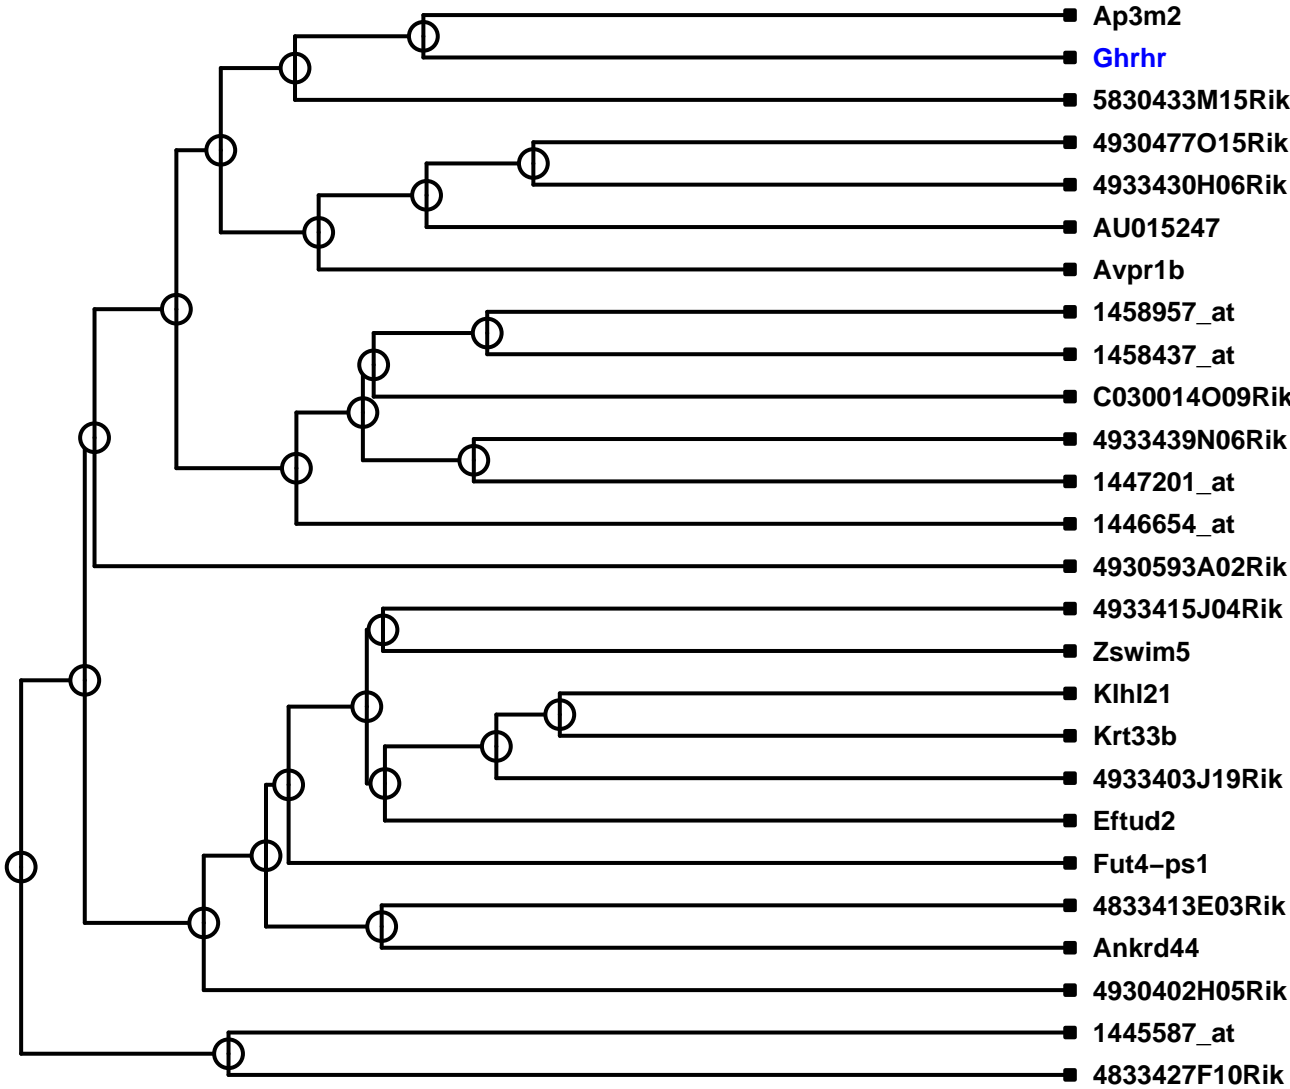

Irs2

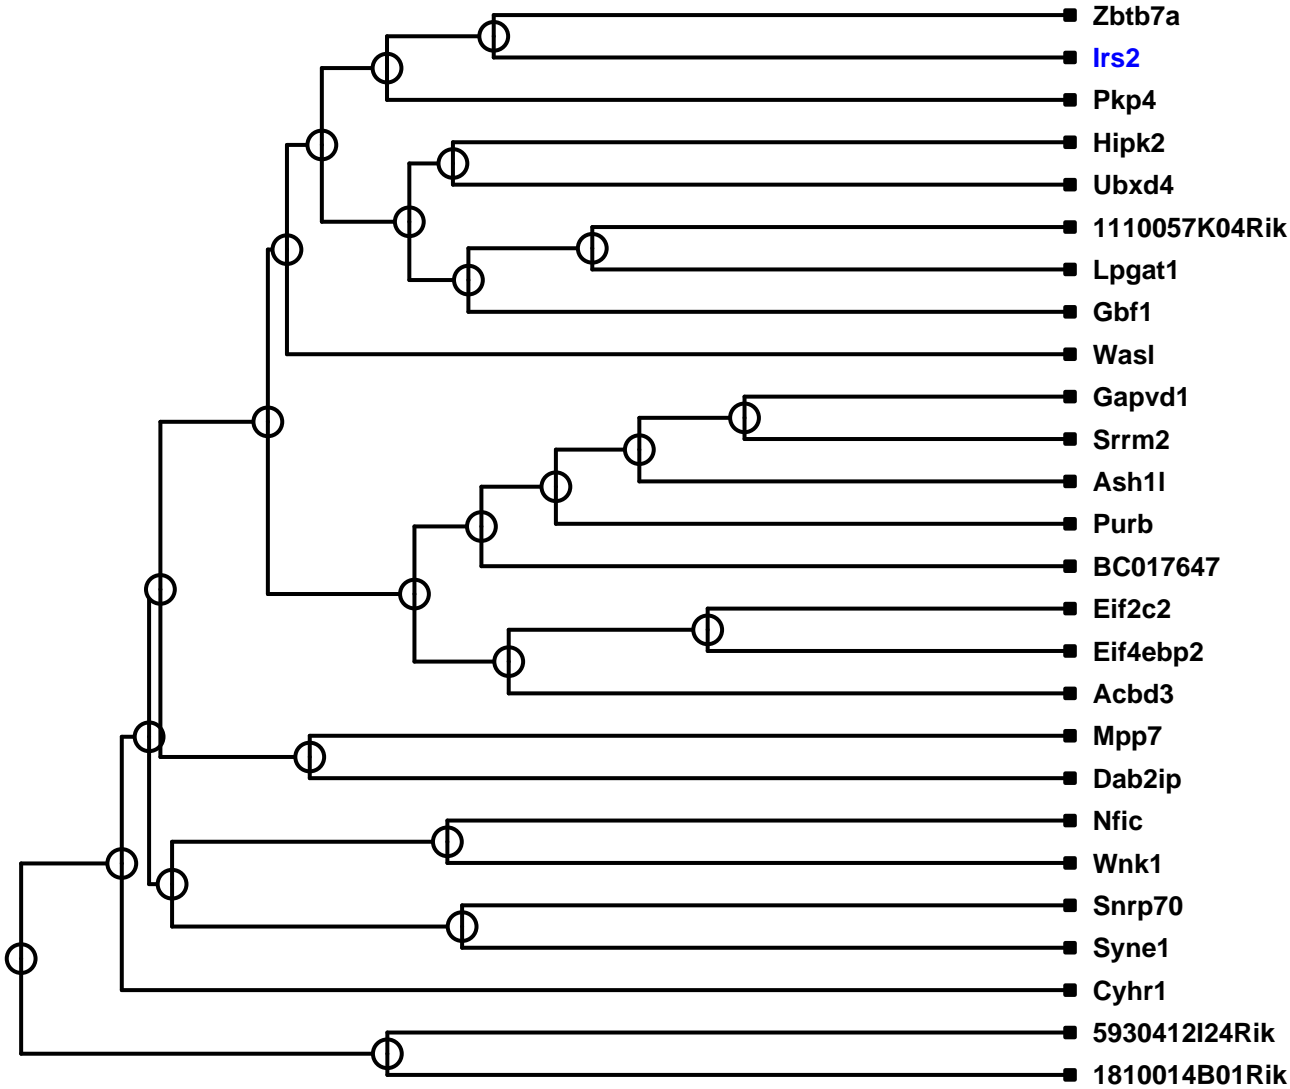

0.6 0.4 0.2 0.0

# PappA

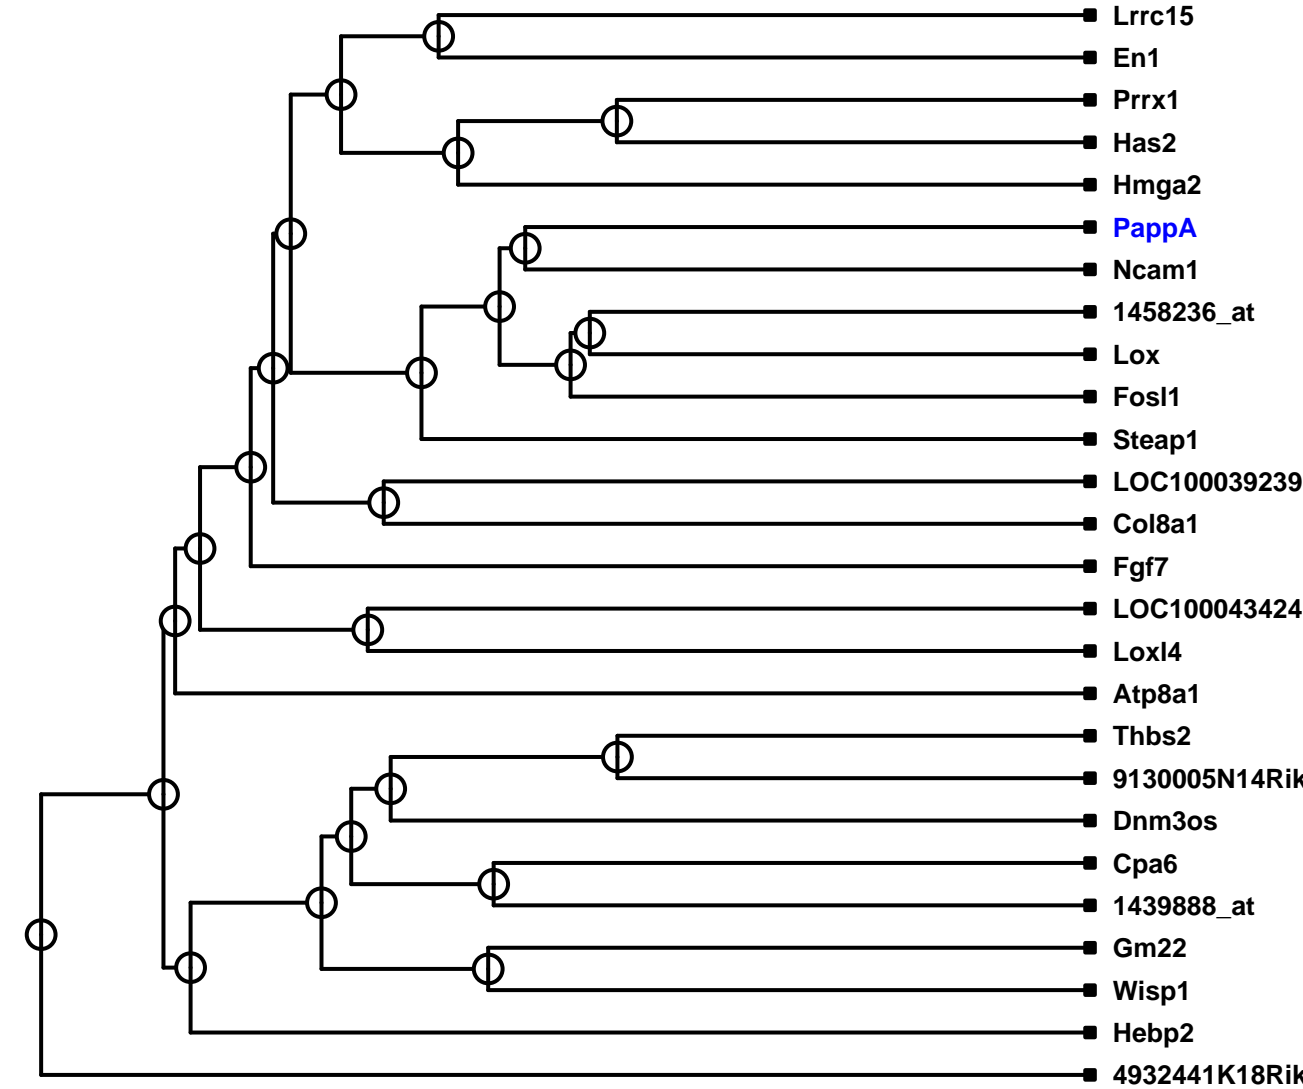

0.7      0.6      0.5      0.4      0.3      0.2      0.1      0.0

# Shc1

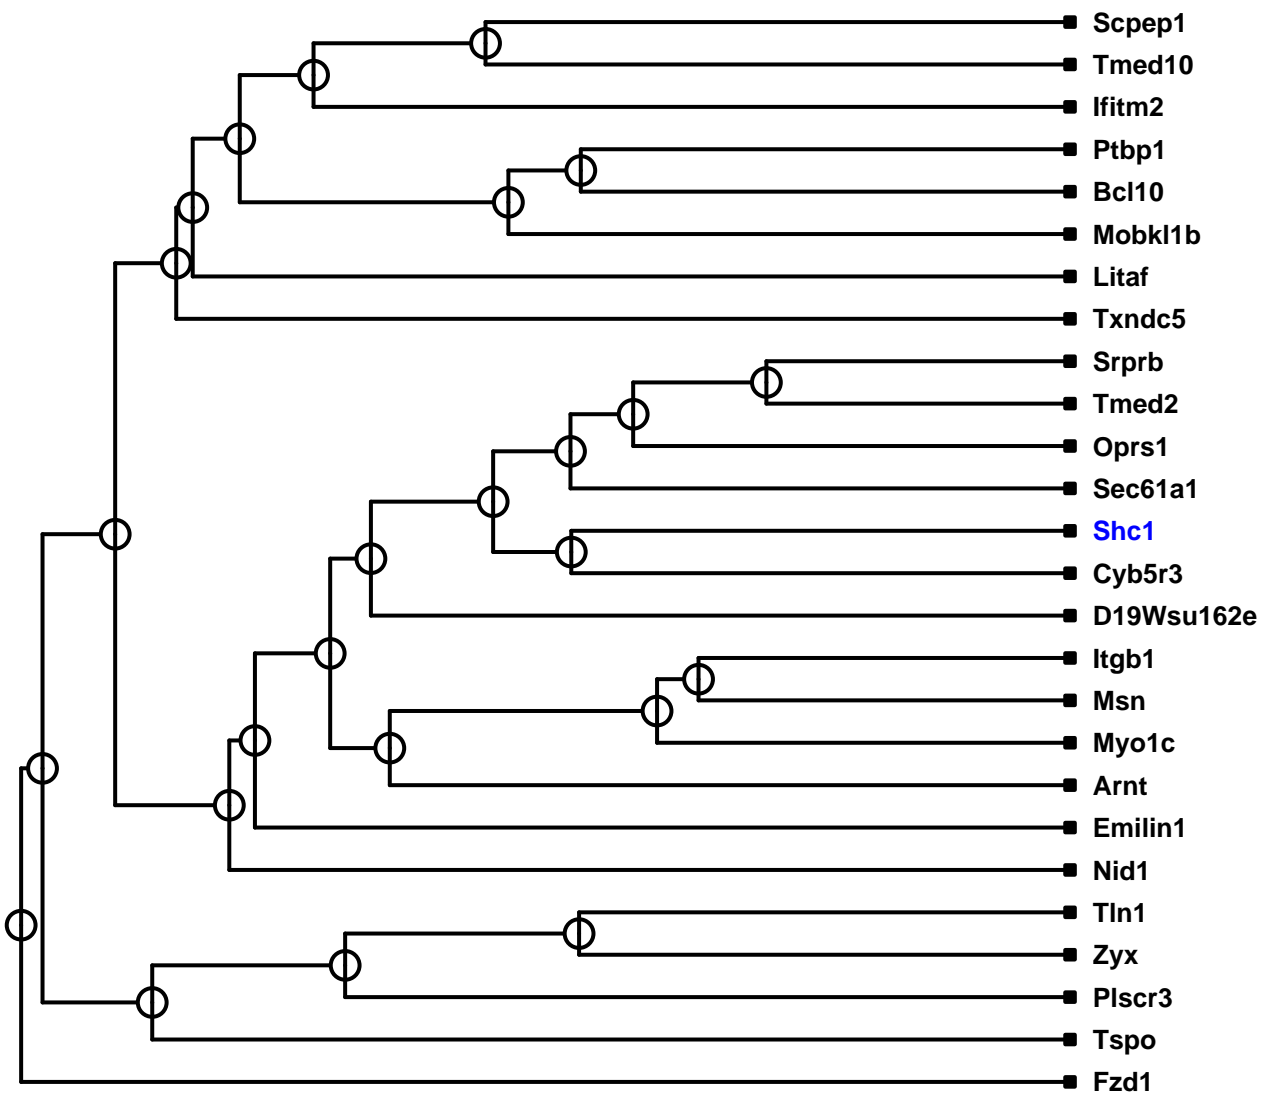



# Igf1r

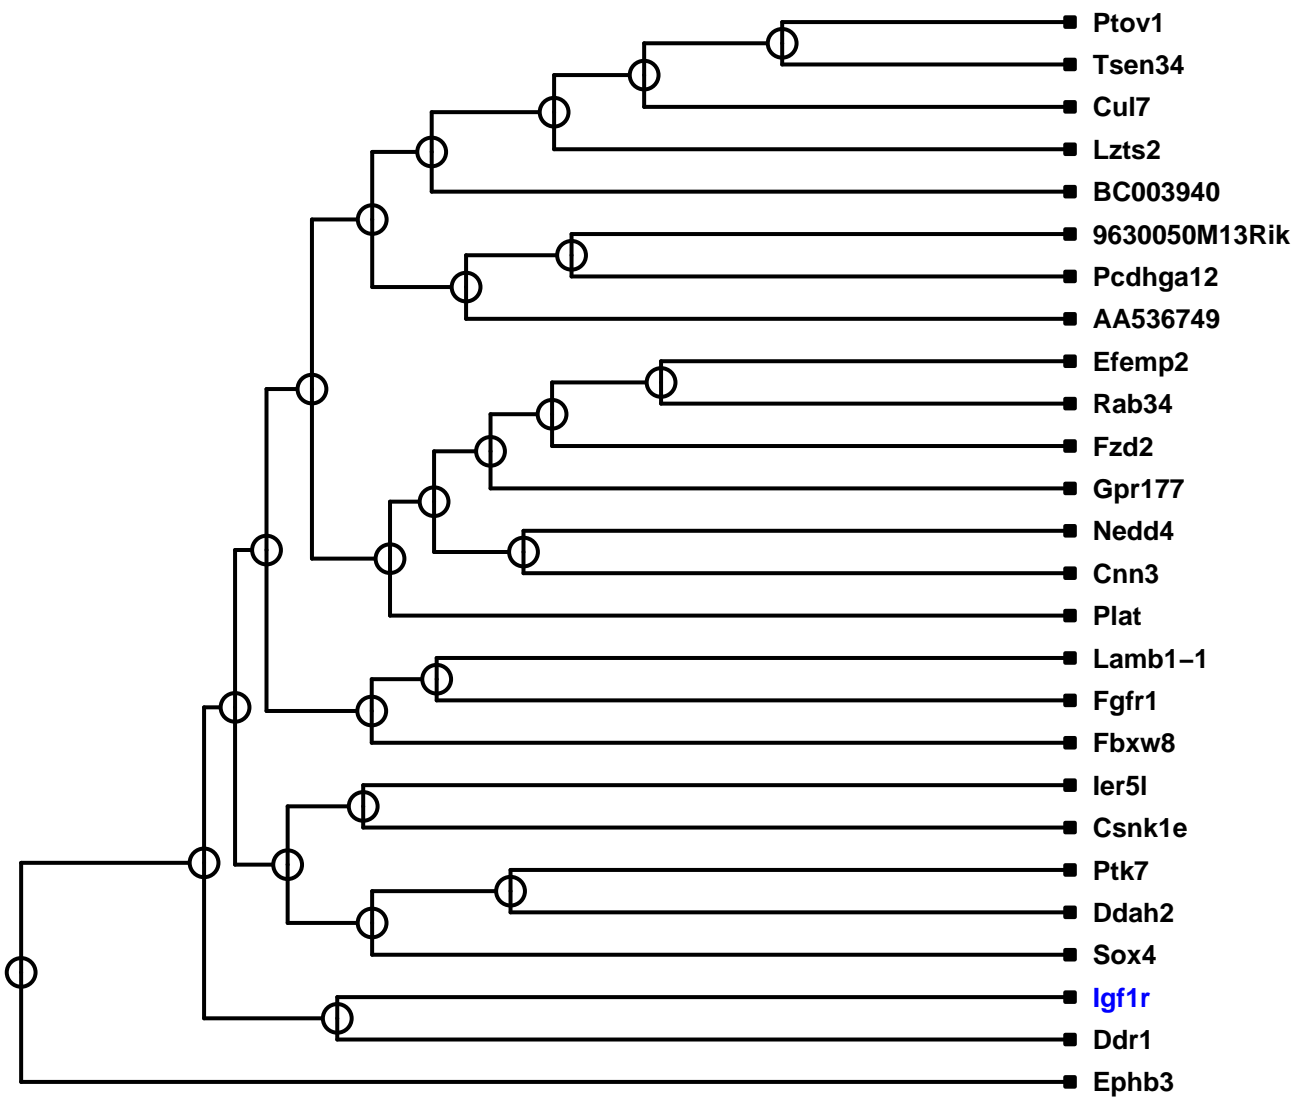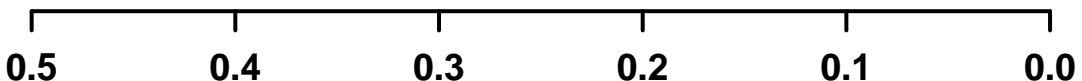

KI

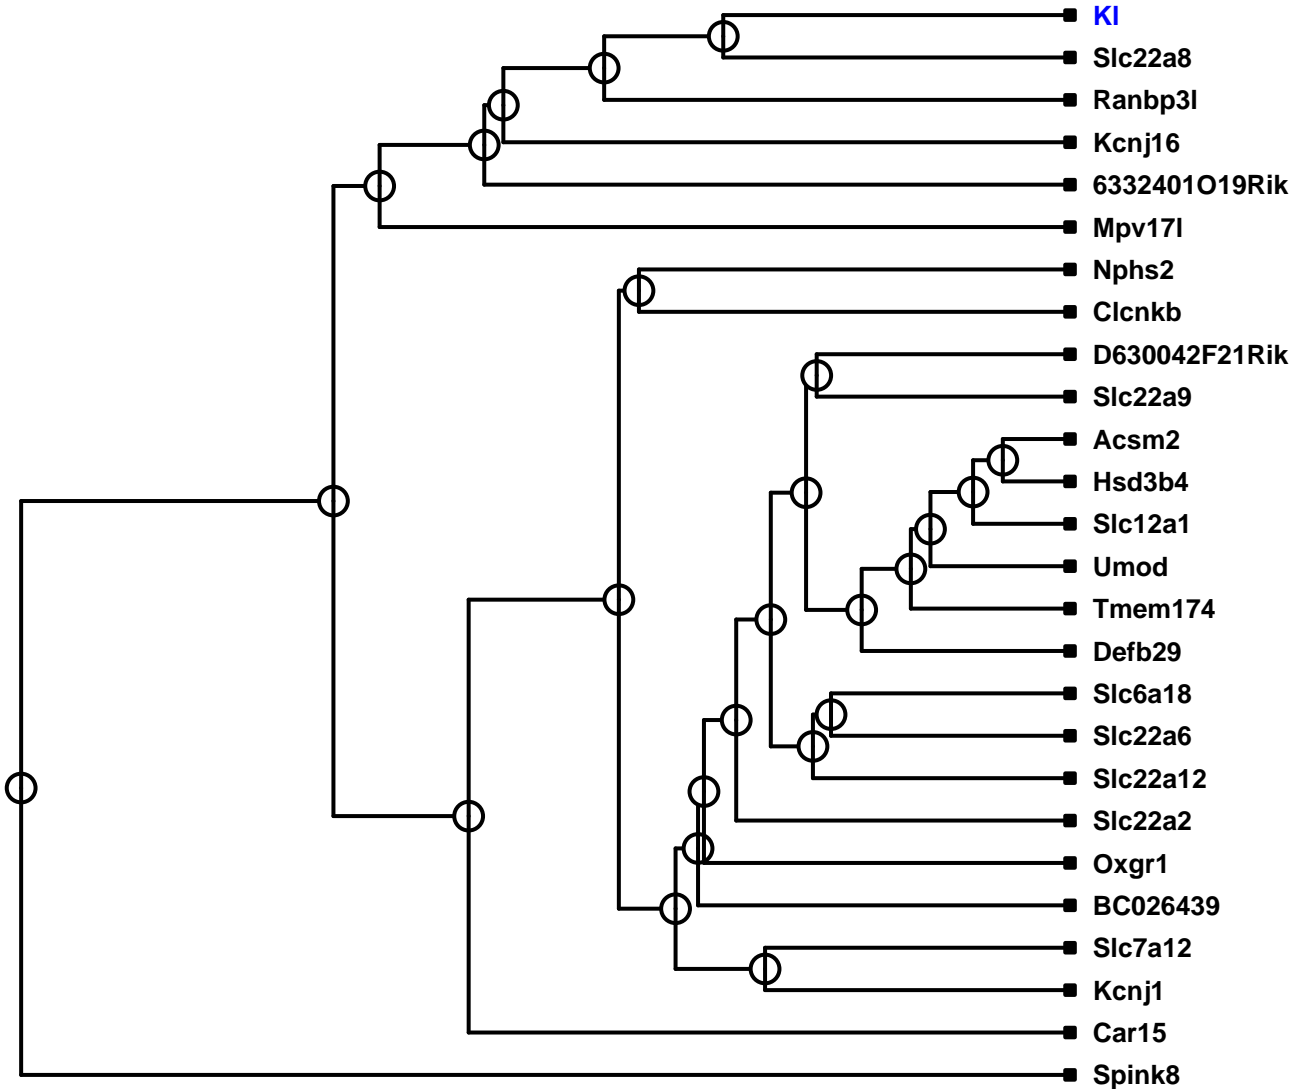

0.5      0.4      0.3      0.2      0.1      0.0

# Adcy5

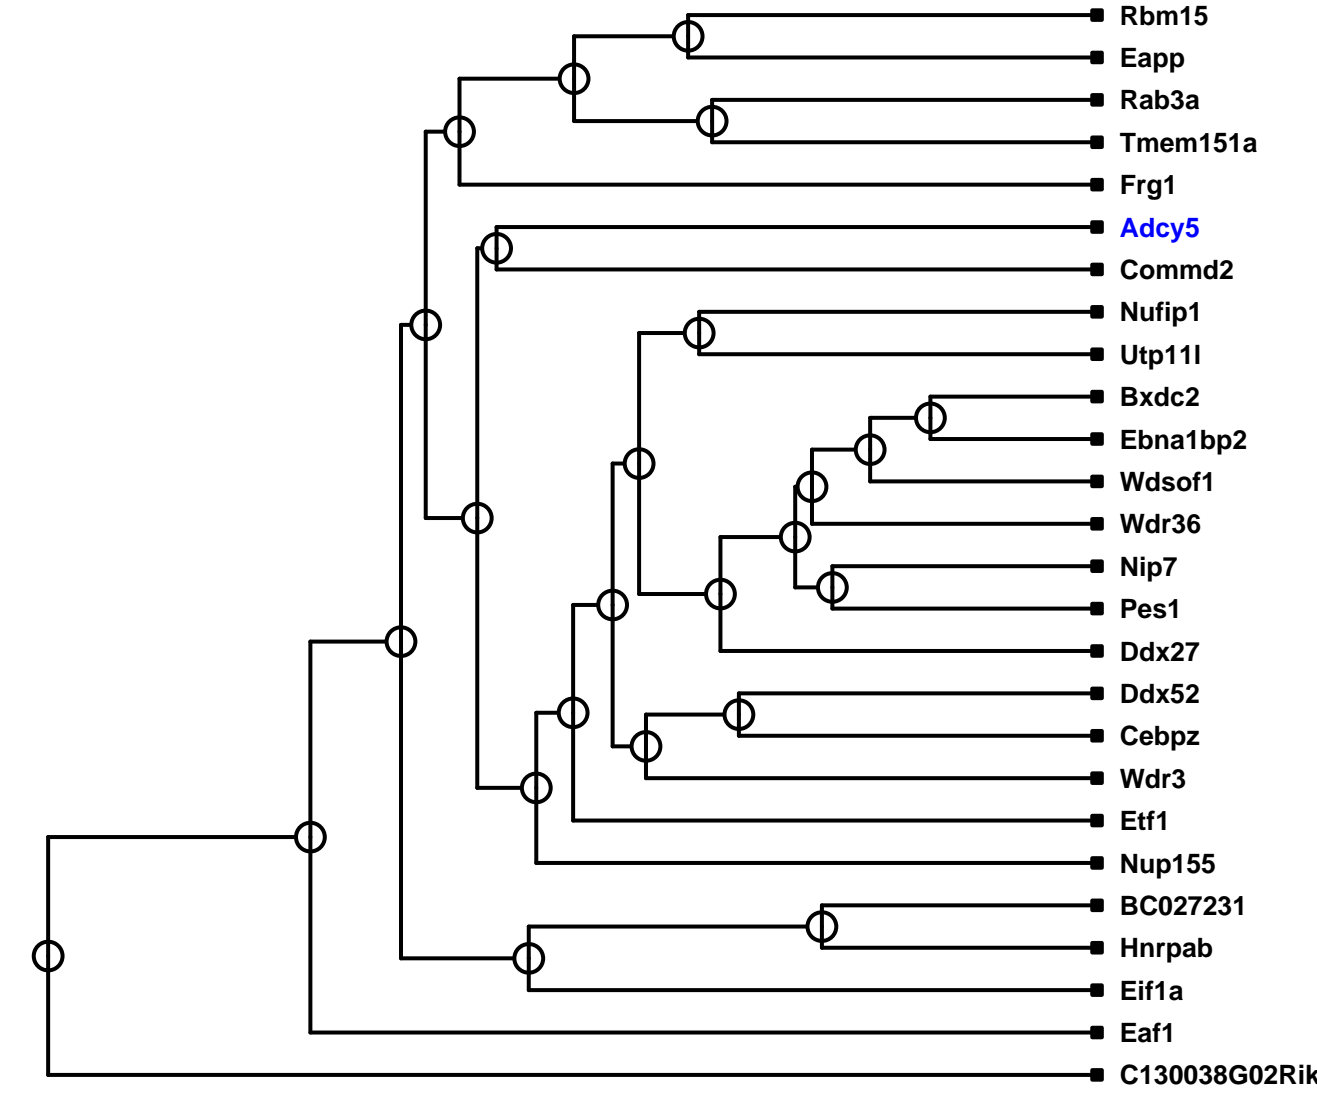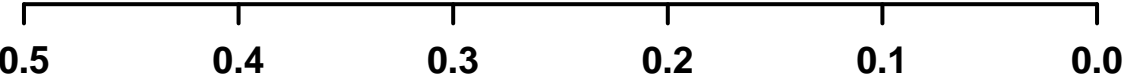

# Surf1

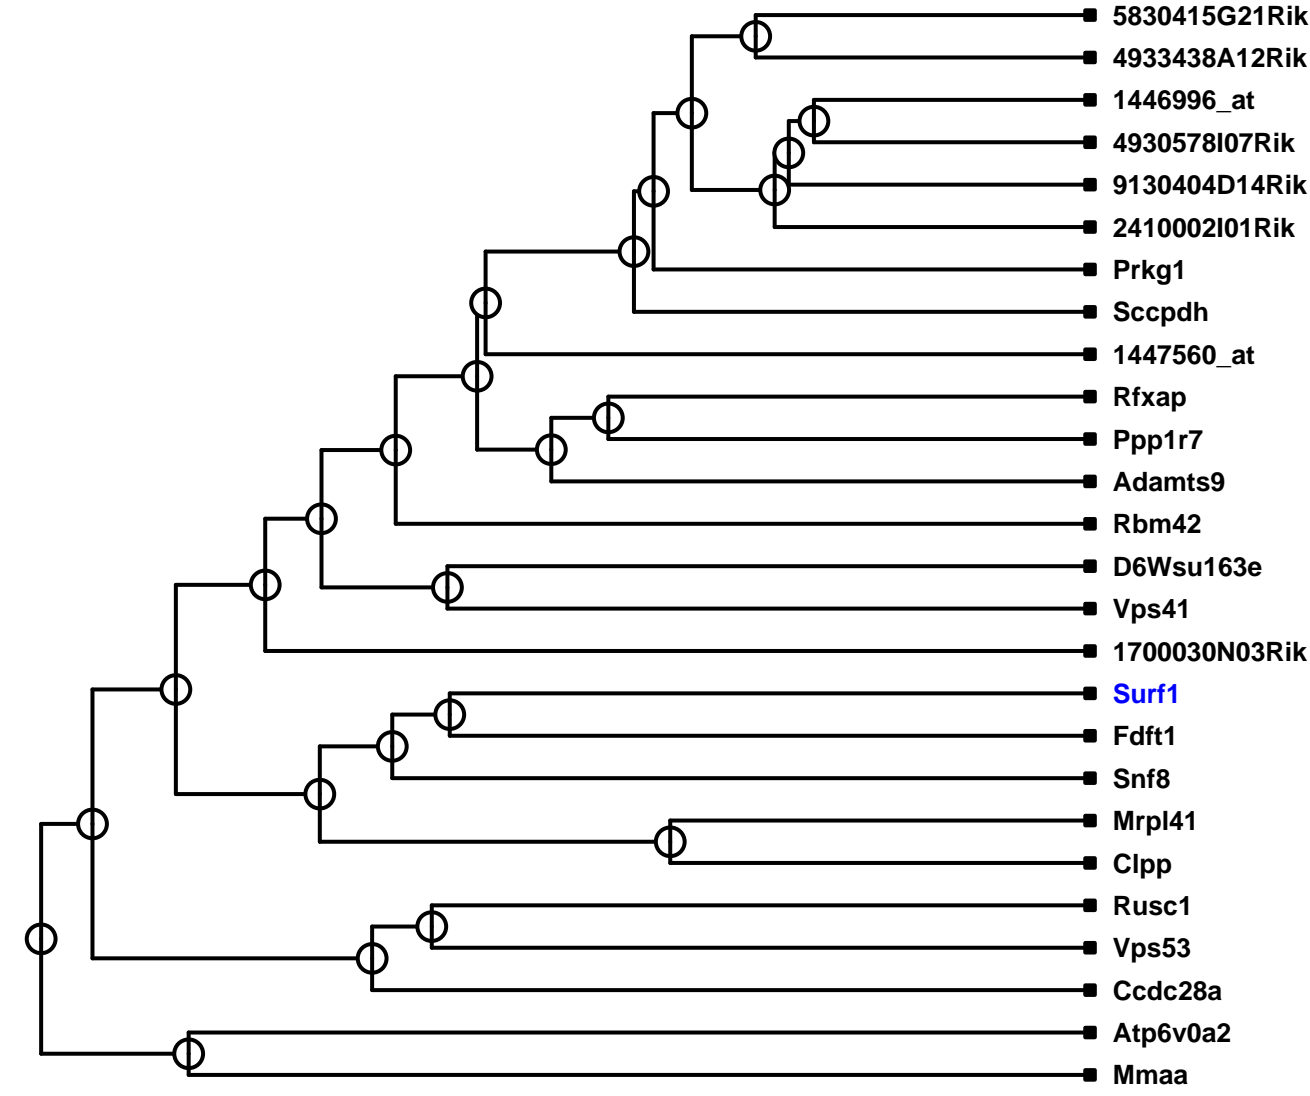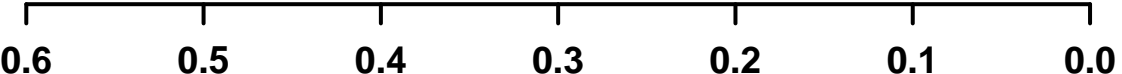

# Insr

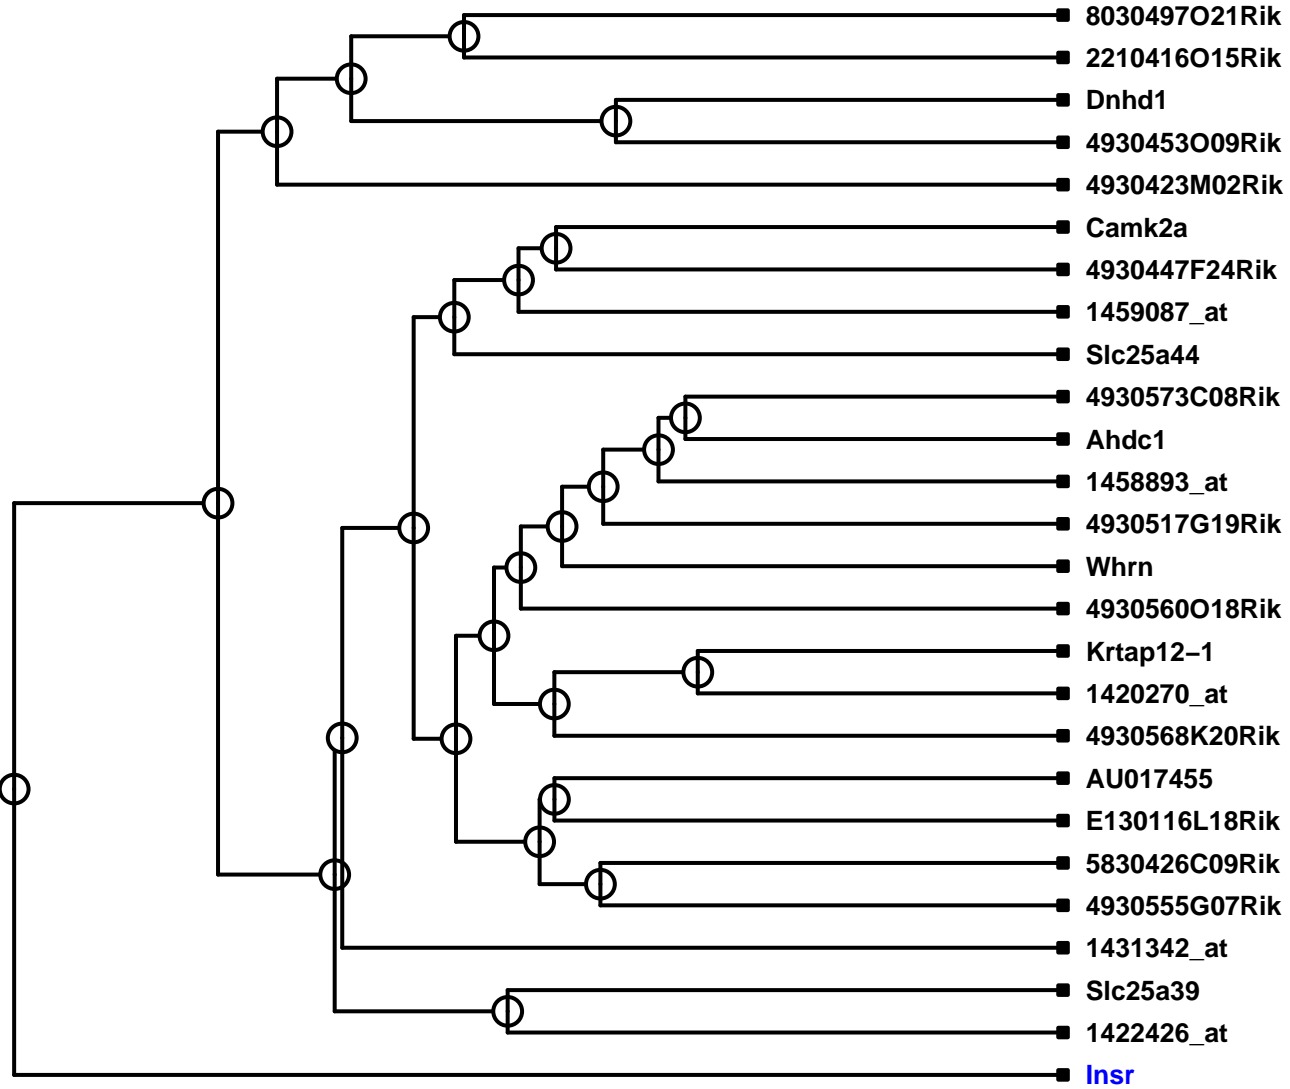

0.20      0.15      0.10      0.05      0.00

# Clk1

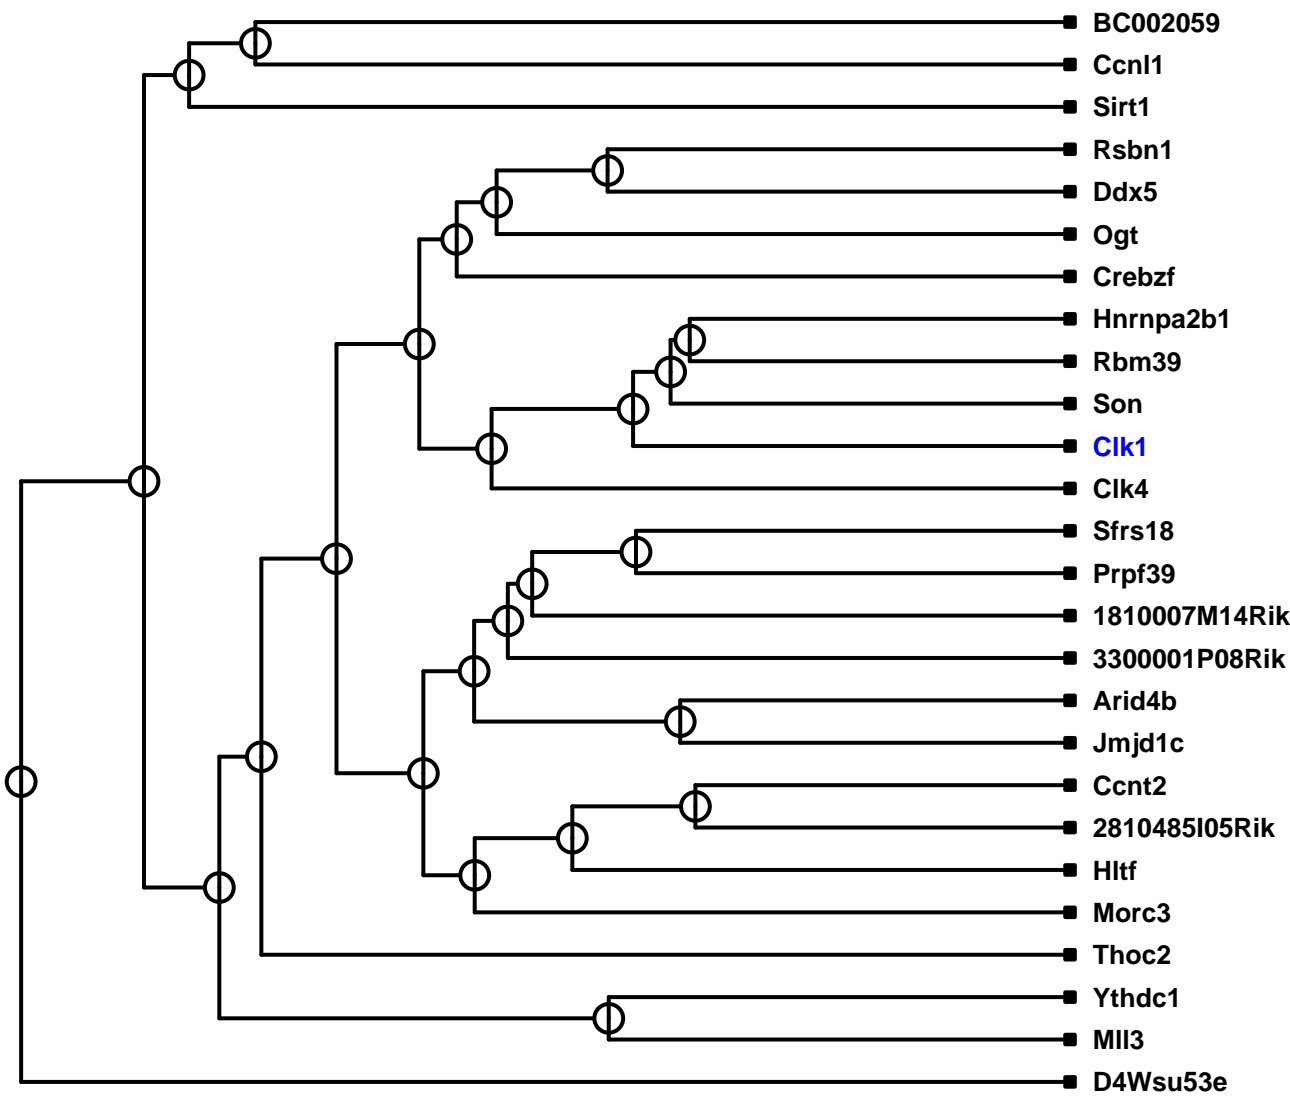

0.3                      0.2                      0.1                      0.0

# Ucp2

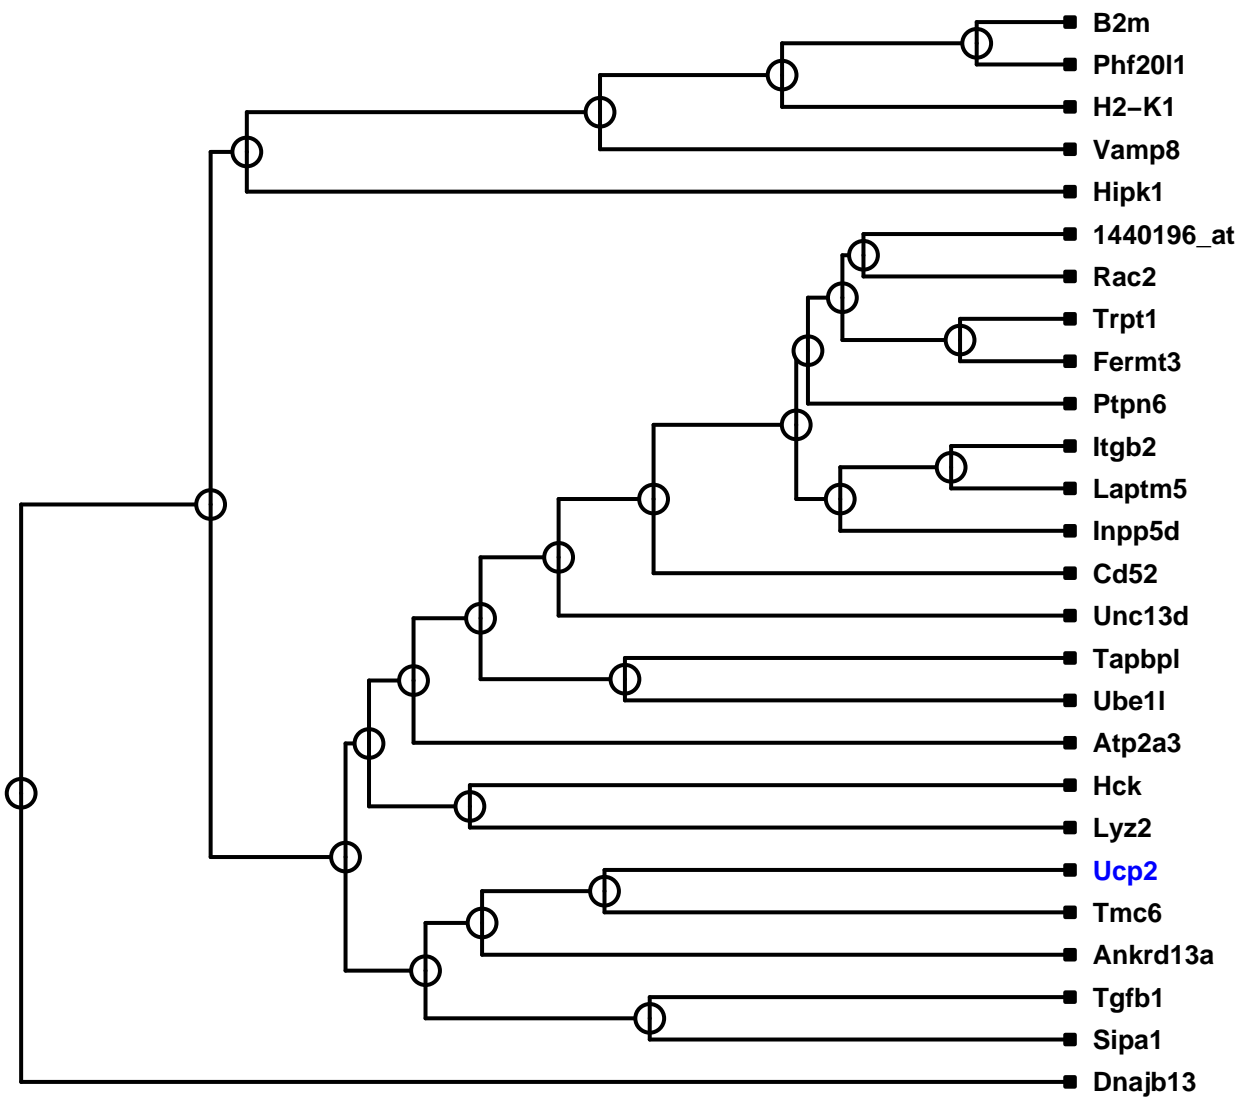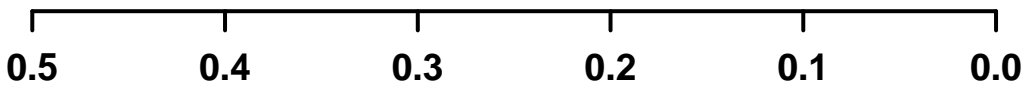

Irs1

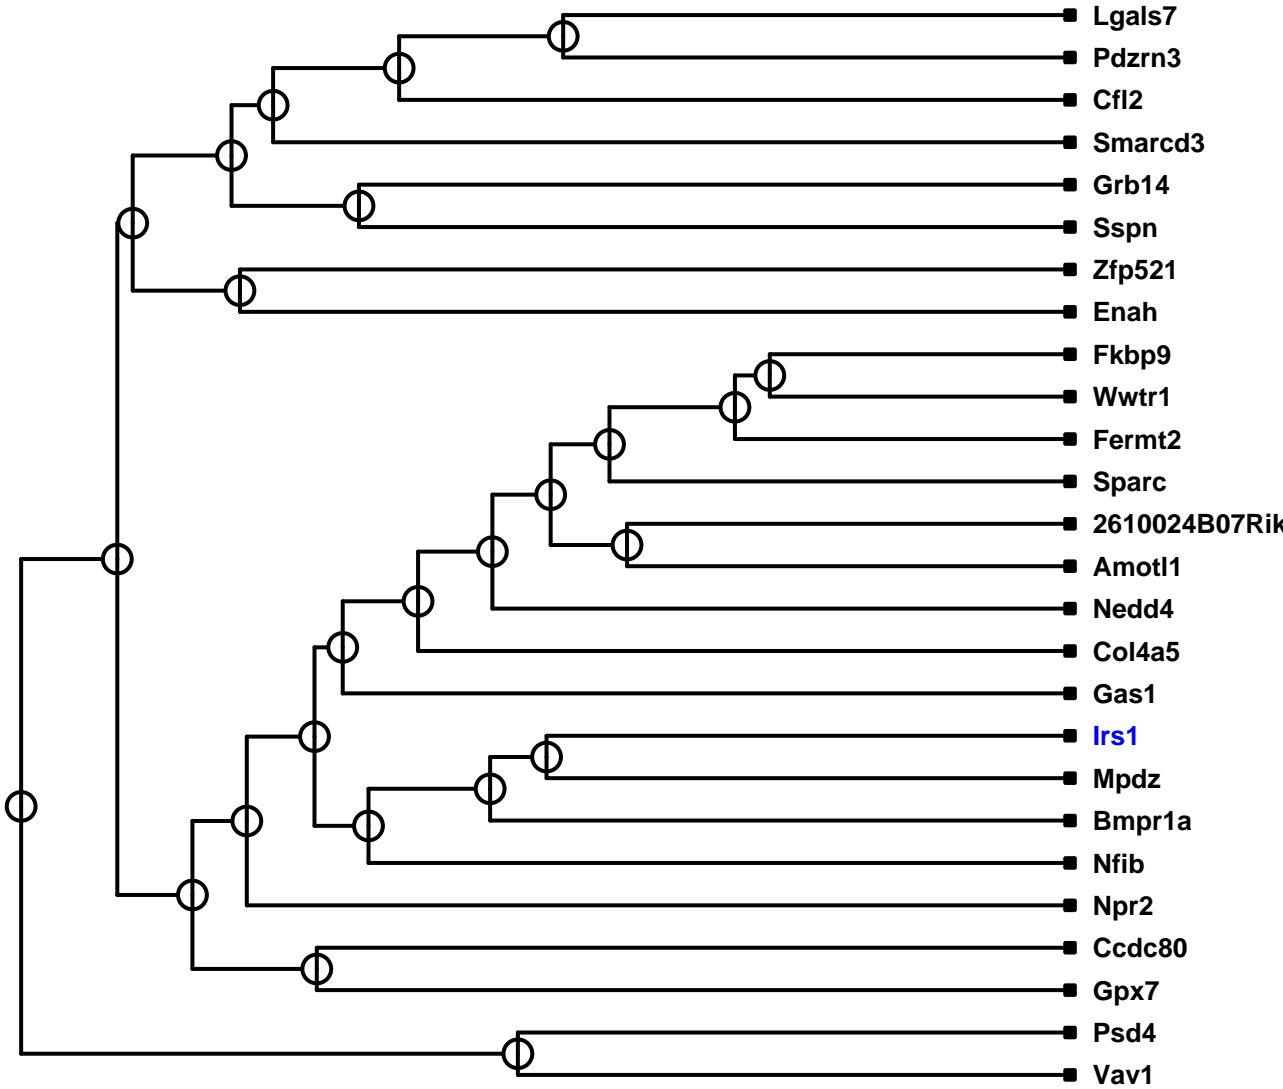



# Gpx4

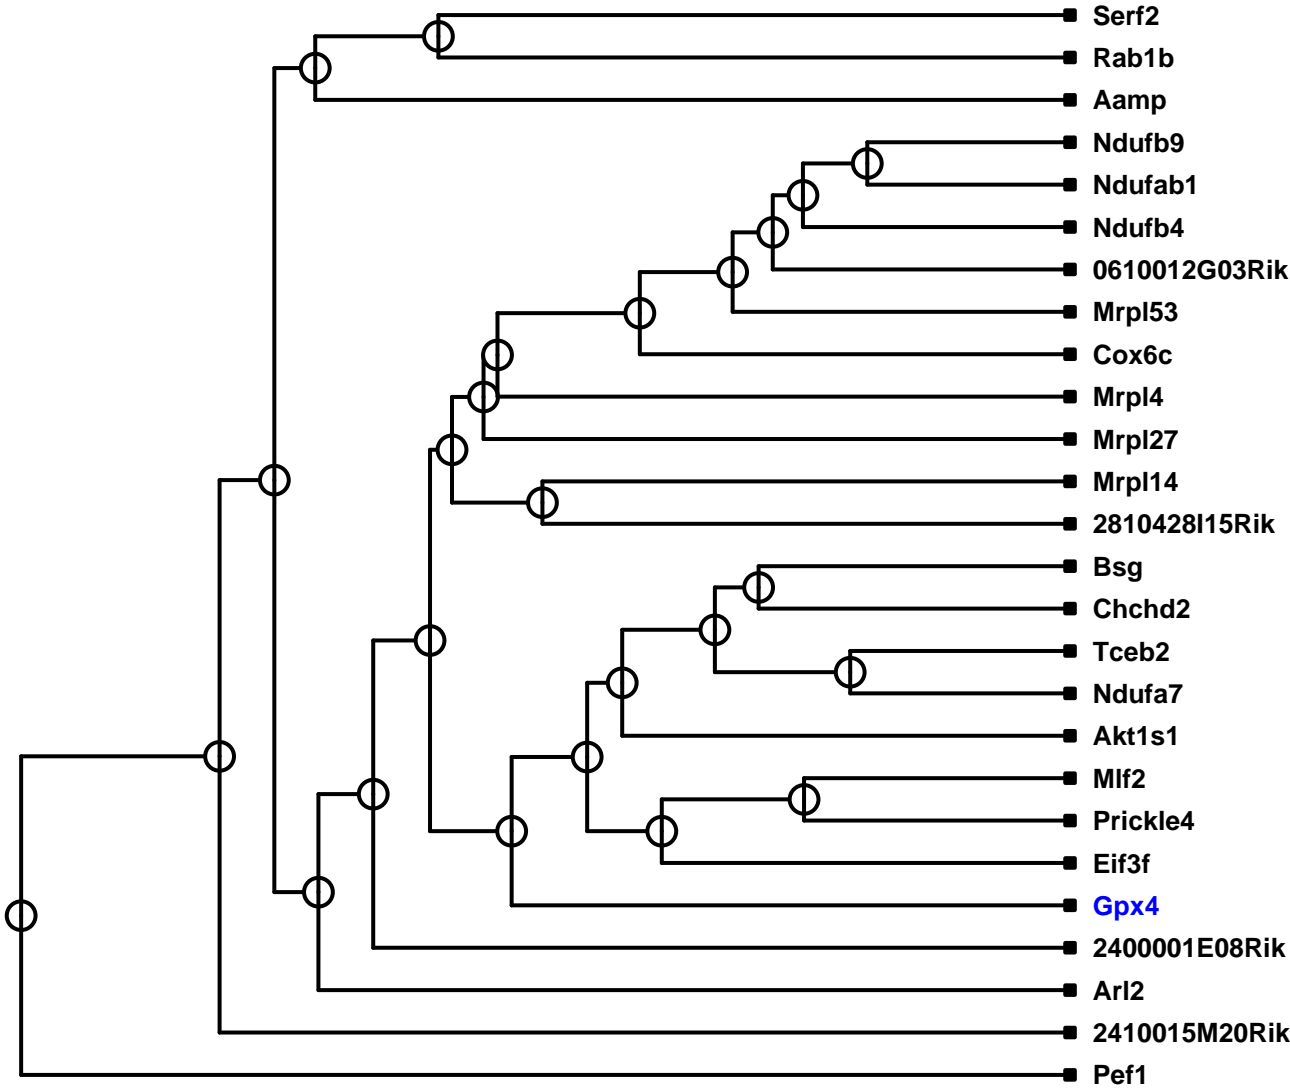

0.3

0.2

0.1

0.0
